# Supplementary material for: A network pharmacology-based strategy deciphers the underlying molecular mechanisms of Qixuehe Capsule in the treatment of menstrual disorders
Source: Springer Nature journal article supplement (doi:10.1186/s13020-017-0145-x), 2017-08-21
Supplement: MOESM2 [file 14226508]

**Tabel S1 Detailed information about the known therapeutic targets for the treatment of menstrual disorders**

| <b>Drugbankid</b> | <b>UniProt_Accession number</b> | <b>Uniprot_ID</b> | <b>Gene_Symbol</b> |
|-------------------|---------------------------------|-------------------|--------------------|
| DB00367           | P03372                          | ESR1_HUMAN        | ESR1               |
| DB00367           | P06401                          | PRGR_HUMAN        | PGR                |
| DB00367           | P10275                          | ANDR_HUMAN        | AR                 |
| DB00367           | P18405                          | S5A1_HUMAN        | SRD5A1             |
| DB00482           | O15530                          | PDPK1_HUMAN       | PDPK1              |
| DB00482           | P35354                          | PGH2_HUMAN        | PTGS2              |
| DB00533           | P15502                          | ELN_HUMAN         | ELN                |
| DB00533           | P35354                          | PGH2_HUMAN        | PTGS2              |
| DB00554           | P23219                          | PGH1_HUMAN        | PTGS1              |
| DB00554           | P35354                          | PGH2_HUMAN        | PTGS2              |
| DB00575           | P08913                          | ADA2A_HUMAN       | ADRA2A             |
| DB00575           | P18089                          | ADA2B_HUMAN       | ADRA2B             |
| DB00575           | P18825                          | ADA2C_HUMAN       | ADRA2C             |
| DB00575           | P25100                          | ADA1D_HUMAN       | ADRA1D             |
| DB00575           | P35348                          | ADA1A_HUMAN       | ADRA1A             |
| DB00575           | P35368                          | ADA1B_HUMAN       | ADRA1B             |
| DB00712           | P23219                          | PGH1_HUMAN        | PTGS1              |
| DB00712           | P35354                          | PGH2_HUMAN        | PTGS2              |
| DB00784           | P23219                          | PGH1_HUMAN        | PTGS1              |
| DB00784           | P35354                          | PGH2_HUMAN        | PTGS2              |
| DB00788           | P23219                          | PGH1_HUMAN        | PTGS1              |
| DB00788           | P35354                          | PGH2_HUMAN        | PTGS2              |
| DB00814           | P23219                          | PGH1_HUMAN        | PTGS1              |
| DB00814           | P35354                          | PGH2_HUMAN        | PTGS2              |
| DB00939           | O43525                          | KCNQ3_HUMAN       | KCNQ3              |
| DB00939           | O43526                          | KCNQ2_HUMAN       | KCNQ2              |
| DB00939           | P09917                          | LOX5_HUMAN        | ALOX5              |
| DB00939           | P23219                          | PGH1_HUMAN        | PTGS1              |
| DB00939           | P35354                          | PGH2_HUMAN        | PTGS2              |
| DB01009           | P23219                          | PGH1_HUMAN        | PTGS1              |
| DB01009           | P25024                          | CXCR1_HUMAN       | CXCR1              |
| DB01009           | P35354                          | PGH2_HUMAN        | PTGS2              |
| DB01050           | P00750                          | TPA_HUMAN         | PLAT               |
| DB01050           | P07204                          | TRBM_HUMAN        | THBD               |
| DB01050           | P10415                          | BCL2_HUMAN        | BCL2               |
| DB01050           | P12104                          | FABPI_HUMAN       | FABP2              |
| DB01050           | P13569                          | CFTR_HUMAN        | CFTR               |
| DB01050           | P23219                          | PGH1_HUMAN        | PTGS1              |
| DB01050           | P35354                          | PGH2_HUMAN        | PTGS2              |
| DB01050           | P37231                          | PPARG_HUMAN       | PPARG              |
| DB01200           | P08908                          | 5HT1A_HUMAN       | HTR1A              |
| DB01200           | P08913                          | ADA2A_HUMAN       | ADRA2A             |
| DB01200           | P14416                          | DRD2_HUMAN        | DRD2               |
| DB01200           | P18089                          | ADA2B_HUMAN       | ADRA2B             |
| DB01200           | P18825                          | ADA2C_HUMAN       | ADRA2C             |
| DB01200           | P21728                          | DRD1_HUMAN        | DRD1               |
| DB01200           | P21917                          | DRD4_HUMAN        | DRD4               |
| DB01200           | P21918                          | DRD5_HUMAN        | DRD5               |
| DB01200           | P25100                          | ADA1D_HUMAN       | ADRA1D             |
| DB01200           | P28221                          | 5HT1D_HUMAN       | HTR1D              |
| DB01200           | P28222                          | 5HT1B_HUMAN       | HTR1B              |
| DB01200           | P28223                          | 5HT2A_HUMAN       | HTR2A              |
| DB01200           | P28335                          | 5HT2C_HUMAN       | HTR2C              |
| DB01200           | P34969                          | 5HT7R_HUMAN       | HTR7               |
| DB01200           | P35348                          | ADA1A_HUMAN       | ADRA1A             |
| DB01200           | P35368                          | ADA1B_HUMAN       | ADRA1B             |
| DB01200           | P35462                          | DRD3_HUMAN        | DRD3               |
| DB01200           | P41595                          | 5HT2B_HUMAN       | HTR2B              |
| DB05749           | P11511                          | CP19A_HUMAN       | CYP19A1            |

**Table S2 List of putative targets for each herb containing Qixuehe Capsule**

| <b>Herbname (abbreviation)</b> | <b>Genesymbol</b> |
|--------------------------------|-------------------|
| CH                             | ABAT              |
| CH                             | ABL1              |
| CH                             | ACADSB            |
| CH                             | ACOT13            |
| CH                             | ACOX1             |
| CH                             | ACSL3             |
| CH                             | ACSL4             |
| CH                             | ADH1B             |
| CH                             | AKR1C1            |
| CH                             | AKR1C2            |
| CH                             | AKR1C3            |
| CH                             | AKR1D1            |
| CH                             | ALDH2             |
| CH                             | ALDH5A1           |
| CH                             | ANXA1             |
| CH                             | AR                |
| CH                             | ARF1              |
| CH                             | ARF6              |
| CH                             | ATP1A1            |
| CH                             | ATP2A1            |
| CH                             | ATP5A1            |
| CH                             | ATP5B             |
| CH                             | ATP5C1            |
| CH                             | ATP6V1C1          |
| CH                             | B3GAT1            |
| CH                             | BCHE              |
| CH                             | BCL2              |
| CH                             | CA1               |
| CH                             | CA12              |
| CH                             | CA14              |
| CH                             | CA2               |
| CH                             | CA3               |
| CH                             | CA4               |
| CH                             | CA5A              |
| CH                             | CA5B              |
| CH                             | CA6               |
| CH                             | CA7               |
| CH                             | CA9               |
| CH                             | CALM1             |
| CH                             | CDK6              |
| CH                             | CFTR              |
| CH                             | COMT              |
| CH                             | CSNK2A1           |
| CH                             | CYP17A1           |
| CH                             | CYP19A1           |
| CH                             | CYP1A2            |
| CH                             | CYP27B1           |
| CH                             | CYP2A6            |
| CH                             | CYP2C8            |

|    |        |
|----|--------|
| CH | DBI    |
| CH | DDX6   |
| CH | E      |
| CH | ECI2   |
| CH | ELOVL4 |
| CH | ESR1   |
| CH | ESR2   |
| CH | FABP2  |
| CH | FADS1  |
| CH | FADS2  |
| CH | FFAR1  |
| CH | FKBP1A |
| CH | FURIN  |
| CH | GABRA1 |
| CH | GABRA2 |
| CH | GABRA3 |
| CH | GABRA4 |
| CH | GABRA5 |
| CH | GABRA6 |
| CH | GABRB1 |
| CH | GABRB2 |
| CH | GABRB3 |
| CH | GABRD  |
| CH | GABRE  |
| CH | GABRG1 |
| CH | GABRG2 |
| CH | GABRG3 |
| CH | GABRP  |
| CH | GABRQ  |
| CH | GLRA3  |
| CH | GLTP   |
| CH | GM2A   |
| CH | GRIN1  |
| CH | GRIN2A |
| CH | GRIN2B |
| CH | GRIN2C |
| CH | GRIN2D |
| CH | GRIN3A |
| CH | GRIN3B |
| CH | GSTP1  |
| CH | GUCA1A |
| CH | HA     |
| CH | HAO1   |
| CH | HCK    |
| CH | HDAC2  |
| CH | HDAC9  |
| CH | HIBCH  |
| CH | HIF1AN |
| CH | HMGCR  |
| CH | HNF4A  |
| CH | HNF4G  |

|    |          |
|----|----------|
| CH | HPGDS    |
| CH | HSD11B1  |
| CH | HSD17B1  |
| CH | HSD17B11 |
| CH | HSD3B1   |
| CH | IGHG1    |
| CH | IGHG2    |
| CH | INS      |
| CH | ISYNA1   |
| CH | ITGB2    |
| CH | ITPR1    |
| CH | LALBA    |
| CH | LIP3     |
| CH | LSS      |
| CH | LY96     |
| CH | MAOB     |
| CH | MT1417   |
| CH | MTTP     |
| CH | NAGA     |
| CH | NCOA1    |
| CH | NCOA2    |
| CH | NR1I2    |
| CH | NR1I3    |
| CH | NR3C1    |
| CH | 72       |
| CH | NR3C2    |
| CH | OGDH     |
| CH | OPRK1    |
| CH | P2RY12   |
| CH | PAEP     |
| CH | PAPSS1   |
| CH | PGR      |
| CH | PIK3CG   |
| CH | PIM1     |
| CH | PKIA     |
| CH | PLA2G1B  |
| CH | PLA2G2A  |
| CH | PLA2G2D  |
| CH | PLA2G2E  |
| CH | PLAT     |
| CH | PMP2     |
| CH | PPARA    |
| CH | PPARD    |
| CH | PPARG    |
| CH | PPP1CC   |
| CH | PPP3CA   |
| CH | PPP3R1   |
| CH | PPT1     |
| CH | PRKACA   |
| CH | PRKCA    |
| CH | PRKCB    |

|    |          |
|----|----------|
| CH | PRLR     |
| CH | PTGIR    |
| CH | PTGIS    |
| CH | PTGS1    |
| CH | PTGS2    |
| CH | PTK2B    |
| CH | PVR      |
| CH | RCVRN    |
| CH | RHO      |
| CH | RORA     |
| CH | RV0233   |
| CH | S100B    |
| CH | SCN10A   |
| CH | SCN11A   |
| CH | SCN1A    |
| CH | SCN1B    |
| CH | SCN2A    |
| CH | SCN2B    |
| CH | SCN3A    |
| CH | SCN3B    |
| CH | SCN4A    |
| CH | SCN4B    |
| CH | SCN5A    |
| CH | SCN7A    |
| CH | SCN8A    |
| CH | SCN9A    |
| CH | SEC14L2  |
| CH | SERPINA1 |
| CH | SIGMAR1  |
| CH | SLC8A1   |
| CH | SOAT1    |
| CH | SOAT2    |
| CH | SP_1951  |
| CH | SQLE     |
| CH | SRD5A1   |
| CH | STK17B   |
| CH | SULT2A1  |
| CH | SULT2B1  |
| CH | SYK      |
| CH | TGFBR2   |
| CH | THBD     |
| CH | TLR4     |
| CH | TOP2A    |
| CH | TRAPPC3  |
| CH | TRDMT1   |
| CH | TREM1    |
| CH | TRPA1    |
| CH | TRPM8    |
| CH | TRPV1    |
| CH | TRPV3    |
| CH | UGT3A1   |

|    |          |
|----|----------|
| CH | VDR      |
| CH | YWHAE    |
| CH | ARGG     |
| CH | BFR      |
| CH | BGLA     |
| CH | CAMC     |
| CH | CC4      |
| CH | CCRA     |
| CH | CELCCF   |
| CH | CELCCG   |
| CH | CELH     |
| CH | CHOB     |
| CH | COBT     |
| CH | CUMD     |
| CH | CYP102A1 |
| CH | CYPC     |
| CH | DCTD     |
| CH | DLGD     |
| CH | ENO      |
| CH | ERYF     |
| CH | FABB     |
| CH | FABG3    |
| CH | FABZ     |
| CH | FADR     |
| CH | FHUA     |
| CH | FUCI     |
| CH | GAG      |
| CH | GAG-POL  |
| CH | GLCB     |
| CH | GLPF     |
| CH | HISD     |
| CH | KSI      |
| CH | LIPB     |
| CH | LPXA     |
| CH | LPXC     |
| CH | LUXF     |
| CH | MALE     |
| CH | MDLB     |
| CH | METE     |
| CH | MEXA     |
| CH | MUTL     |
| CH | MUTY     |
| CH | NAGJ     |
| CH | NCSA     |
| CH | NEF      |
| CH | NPRS     |
| CH | NRDB     |
| CH | ONR      |
| CH | PAB      |
| CH | PFLB     |
| CH | PHNA     |

|    |         |
|----|---------|
| CH | RHAA    |
| CH | RMLC    |
| CH | SERA    |
| CH | TCP14   |
| CH | TESA    |
| CH | TONB    |
| CH | TTGR    |
| CH | XYLA    |
| CS | ABO     |
| CS | AKR1C1  |
| CS | AKR1C2  |
| CS | AKR1C3  |
| CS | AR      |
| CS | ATP1A1  |
| CS | ATP5A1  |
| CS | ATP5B   |
| CS | ATP5C1  |
| CS | CA2     |
| CS | CTRB1   |
| CS | CTSB    |
| CS | DAO     |
| CS | EDNRA   |
| CS | ESR1    |
| CS | ESR2    |
| CS | GABRA1  |
| CS | GABRA2  |
| CS | GABRA3  |
| CS | GABRA4  |
| CS | GABRA5  |
| CS | GABRA6  |
| CS | GABRB1  |
| CS | GABRB2  |
| CS | GABRB3  |
| CS | GABRD   |
| CS | GABRE   |
| CS | GABRG1  |
| CS | GABRG2  |
| CS | GABRG3  |
| CS | GABRP   |
| CS | GABRQ   |
| CS | GRIN1   |
| CS | GRIN2A  |
| CS | GRIN2B  |
| CS | GRIN2C  |
| CS | GRIN2D  |
| CS | GRIN3A  |
| CS | GRIN3B  |
| CS | HRSP12  |
| CS | HSD17B1 |
| CS | LCN2    |
| CS | LIP3    |

|    |         |
|----|---------|
| CS | LSS     |
| CS | MIF     |
| CS | NCOA2   |
| CS | NR1I2   |
| CS | NR1I3   |
| CS | NR3C1   |
| CS | PGR     |
| CS | PPARA   |
| CS | PRDX5   |
| CS | PTGS1   |
| CS | PTGS2   |
| CS | RAB9A   |
| CS | RORA    |
| CS | SIGMAR1 |
| CS | SULT2A1 |
| CS | SULT2B1 |
| CS | VDR     |
| CS | CHOB    |
| CS | CHQB    |
| CS | CLCA    |
| CS | COCE    |
| CS | CPO     |
| CS | CUMD    |
| CS | CUTA    |
| CS | DHBE    |
| CS | ELTB    |
| CS | HUTH    |
| CS | KSI     |
| CS | MALT    |
| CS | NFSB    |
| CS | OXYR    |
| CS | POBA    |
| CS | PPTA    |
| CS | PYP     |
| CS | REPA    |
| CX | 72      |
| CX | 9       |
| CX | ABAT    |
| CX | ABL1    |
| CX | ABO     |
| CX | ACADSB  |
| CX | ACHE    |
| CX | ACOX1   |
| CX | ACSL3   |
| CX | ACSL4   |
| CX | ACTA1   |
| CX | AKR1C1  |
| CX | AKR1C2  |
| CX | AKR1C3  |
| CX | ALDH2   |
| CX | ALDH5A1 |



|    |          |
|----|----------|
| CX | AMY1A    |
| CX | AMY2A    |
| CX | AMY2B    |
| CX | AOX1     |
| CX | AR       |
| CX | ARF1     |
| CX | ARF6     |
| CX | ATOX1    |
| CX | ATP1A1   |
| CX | ATP5A1   |
| CX | ATP5B    |
| CX | ATP5C1   |
| CX | BCHE     |
| CX | CA1      |
| CX | CA12     |
| CX | CA14     |
| CX | CA2      |
| CX | CA3      |
| CX | CA4      |
| CX | CA5A     |
| CX | CA5B     |
| CX | CA6      |
| CX | CA7      |
| CX | CA9      |
| CX | CACNA1A  |
| CX | CACNA1B  |
| CX | CACNA1C  |
| CX | CACNA1D  |
| CX | CACNA1F  |
| CX | CACNA1G  |
| CX | CACNA1H  |
| CX | CACNA1I  |
| CX | CACNA1S  |
| CX | CACNA2D1 |
| CX | CACNA2D2 |
| CX | CACNA2D3 |
| CX | CACNB1   |
| CX | CACNB2   |
| CX | CACNB3   |
| CX | CACNB4   |
| CX | CACNG1   |
| CX | CALM1    |
| CX | CDA      |
| CX | CDK6     |
| CX | COMT     |
| CX | CSNK2A1  |
| CX | CTRB1    |
| CX | CYP11B2  |
| CX | CYP19A1  |
| CX | CYP27B1  |
| CX | CYP2B6   |

|    |        |
|----|--------|
| CX | CYP2C8 |
| CX | DHODH  |
| CX | DPYD   |
| CX | ECI2   |
| CX | ELOVL4 |
| CX | ESR1   |
| CX | ESR2   |
| CX | FADS1  |
| CX | FADS2  |
| CX | FFAR1  |
| CX | FHIT   |
| CX | FKBP1A |
| CX | FURIN  |
| CX | GABRA1 |
| CX | GABRA2 |
| CX | GABRA3 |
| CX | GABRA4 |
| CX | GABRA5 |
| CX | GABRA6 |
| CX | GABRB1 |
| CX | GABRB2 |
| CX | GABRB3 |
| CX | GABRD  |
| CX | GABRE  |
| CX | GABRG1 |
| CX | GABRG2 |
| CX | GABRG3 |
| CX | GABRP  |
| CX | GABRQ  |
| CX | GCK    |
| CX | GLRA3  |
| CX | GLT6D1 |
| CX | GLTP   |
| CX | GM2A   |
| CX | GNPDA1 |
| CX | GRIN1  |
| CX | GRIN2A |
| CX | GRIN2B |
| CX | GRIN2C |
| CX | GRIN2D |
| CX | GRIN3A |
| CX | GRIN3B |
| CX | GUCA1A |
| CX | HAO1   |
| CX | HCK    |
| CX | HDAC2  |
| CX | HDAC9  |
| CX | HIBCH  |
| CX | HK1    |
| CX | HNF4A  |
| CX | HNF4G  |

|    |          |
|----|----------|
| CX | HSD11B1  |
| CX | HSD17B1  |
| CX | IFNB1    |
| CX | IGHG1    |
| CX | INS      |
| CX | KRTAP5-2 |
| CX | KRTAP5-3 |
| CX | LALBA    |
| CX | LCN2     |
| CX | LCTL     |
| CX | LGALS2   |
| CX | LGALS7   |
| CX | LIP3     |
| CX | LSS      |
| CX | LY96     |
| CX | LYZ      |
| CX | MB       |
| CX | MED1     |
| CX | MIF      |
| CX | MT1417   |
| CX | MTTP     |
| CX | NCAN     |
| CX | NCOA1    |
| CX | NCOA2    |
| CX | NR1I2    |
| CX | NR1I3    |
| CX | NR3C1    |
| CX | NR3C2    |
| CX | NUDT9    |
| CX | OGDH     |
| CX | P2RY12   |
| CX | PAEP     |
| CX | PCYT1A   |
| CX | PCYT1B   |
| CX | PGR      |
| CX | PHOSPHO1 |
| CX | PIK3CG   |
| CX | PIM1     |
| CX | PKIA     |
| CX | PLA2G1B  |
| CX | PLA2G2A  |
| CX | PLA2G2D  |
| CX | PLA2G2E  |
| CX | PLD1     |
| CX | PLD2     |
| CX | PMP2     |
| CX | PPARA    |
| CX | PPARD    |
| CX | PPARG    |
| CX | PPP1CC   |
| CX | PPP3CA   |

|    |         |
|----|---------|
| CX | PPP3R1  |
| CX | PPT1    |
| CX | PRKACA  |
| CX | PRKCA   |
| CX | PRKCB   |
| CX | PRLR    |
| CX | PTGIR   |
| CX | PTGIS   |
| CX | PTGS1   |
| CX | PTGS2   |
| CX | PTK2B   |
| CX | PVR     |
| CX | PYGL    |
| CX | PYGM    |
| CX | RCVRN   |
| CX | RHO     |
| CX | RORA    |
| CX | RTCB    |
| CX | RV0233  |
| CX | S100B   |
| CX | SCN10A  |
| CX | SCN11A  |
| CX | SCN1A   |
| CX | SCN1B   |
| CX | SCN2A   |
| CX | SCN2B   |
| CX | SCN3A   |
| CX | SCN3B   |
| CX | SCN4A   |
| CX | SCN4B   |
| CX | SCN5A   |
| CX | SCN7A   |
| CX | SCN8A   |
| CX | SCN9A   |
| CX | SEC14L2 |
| CX | SFTPD   |
| CX | SHBG    |
| CX | SIGLEC1 |
| CX | SIGMAR1 |
| CX | SLC8A1  |
| CX | SMARCA5 |
| CX | SOAT1   |
| CX | SOAT2   |
| CX | SQLE    |
| CX | SRD5A1  |
| CX | SRD5A2  |
| CX | SRD5A3  |
| CX | STK17B  |
| CX | SULT2A1 |
| CX | SULT2B1 |
| CX | SYK     |

|    |             |
|----|-------------|
| CX | TLR4        |
| CX | TOP2A       |
| CX | TRAPPC3     |
| CX | TRPV1       |
| CX | TYMS        |
| CX | UCKL1       |
| CX | UGT3A1      |
| CX | VDR         |
| CX | XDH         |
| CX | YWHAE       |
| CX | ABFA        |
| CX | ACTIII      |
| CX | AGLA        |
| CX | ALGD        |
| CX | ALSB        |
| CX | AMPC        |
| CX | AMS         |
| CX | AMY         |
| CX | AMYA        |
| CX | AMYE        |
| CX | AMYM        |
| CX | AMYP        |
| CX | ARAC        |
| CX | ARAF        |
| CX | ASPA        |
| CX | BGL3        |
| CX | BLA         |
| CX | BLACTX-M-14 |
| CX | BLACTX-M-27 |
| CX | BLACTX-M-9A |
| CX | BOTB        |
| CX | BPHC        |
| CX | BUDC        |
| CX | CATA        |
| CX | CBHA        |
| CX | CEL5A       |
| CX | CELA        |
| CX | CELA1       |
| CX | CELB        |
| CX | CELC307     |
| CX | CELCCF      |
| CX | CELCCG      |
| CX | CELD        |
| CX | CELS        |
| CX | CENC        |
| CX | CEX         |
| CX | CFT         |
| CX | CGT         |
| CX | CHOB        |
| CX | CSLB        |
| CX | CTXB        |

|    |          |
|----|----------|
| CX | CUMD     |
| CX | CYP102A1 |
| CX | CYPC     |
| CX | DEOA     |
| CX | DHBE     |
| CX | DMSA     |
| CX | EBGA     |
| CX | ECO      |
| CX | ENGF     |
| CX | ENTB     |
| CX | FABB     |
| CX | FABI     |
| CX | FABZ     |
| CX | FADR     |
| CX | FHUA     |
| CX | GAG      |
| CX | GAG-POL  |
| CX | GALM     |
| CX | GANB     |
| CX | GDHB     |
| CX | GFO      |
| CX | GLK      |
| CX | HMUO     |
| CX | HUTH     |
| CX | KSI      |
| CX | LACZ     |
| CX | LAMB     |
| CX | LECB     |
| CX | LGTC     |
| CX | LIPB     |
| CX | LPXC     |
| CX | LUXF     |
| CX | MAF      |
| CX | MALE     |
| CX | MALP     |
| CX | MDLB     |
| CX | MGLB     |
| CX | MNDD     |
| CX | MOXC     |
| CX | MUTY     |
| CX | NAHD     |
| CX | NEDA     |
| CX | NEF      |
| CX | NOS      |
| CX | NPLT     |
| CX | PAB      |
| CX | PAC      |
| CX | PCAG     |
| CX | PCAH     |
| CX | PDP      |
| CX | PHR      |

|    |        |
|----|--------|
| CX | POBA   |
| CX | PPGMK  |
| CX | PYP    |
| CX | PYRC   |
| CX | PYRD   |
| CX | PYRDA  |
| CX | PYRE   |
| CX | RBSK   |
| CX | RSUA   |
| CX | SACB   |
| CX | SCRY   |
| CX | SPOII  |
| CX | STX2EB |
| CX | STXB   |
| CX | TCP14  |
| CX | TESA   |
| CX | TETX   |
| CX | TONB   |
| CX | TREZ   |
| CX | TTGR   |
| CX | TVAI   |
| CX | TVAII  |
| CX | UBIC   |
| CX | UDG    |
| CX | UNG    |
| CX | XLNA   |
| CX | XYLA   |
| CX | XYNA   |
| CX | XYNY   |
| CX | XYNZ   |
| DG | 9      |
| DG | AADAT  |
| DG | AARS   |
| DG | AARS2  |
| DG | AASS   |
| DG | ABAT   |
| DG | ABO    |
| DG | ACACB  |
| DG | ACADSB |
| DG | ACCS   |
| DG | ACO2   |
| DG | ACOT13 |
| DG | ACP1   |
| DG | ACTA1  |
| DG | ACY1   |
| DG | ACY3   |
| DG | ADH1B  |
| DG | ADSS   |
| DG | ADSSL1 |
| DG | AGXT   |
| DG | AGXT2  |

|    |          |
|----|----------|
| DG | AKR1B1   |
| DG | AKR1C1   |
| DG | AKR1C2   |
| DG | AKR1D1   |
| DG | ALAD     |
| DG | ALAS1    |
| DG | ALAS2    |
| DG | ALDH18A1 |
| DG | ALDH5A1  |
| DG | AMY1A    |
| DG | AMY2A    |
| DG | AMY2B    |
| DG | ANXA5    |
| DG | AOX1     |
| DG | APRT     |
| DG | AR       |
| DG | ARF1     |
| DG | ARG1     |
| DG | ARG2     |
| DG | ASL      |
| DG | ASNS     |
| DG | ASPA     |
| DG | ASPH     |
| DG | ASRGL1   |
| DG | ASS      |
| DG | ASS1     |
| DG | ATOX1    |
| DG | ATP1A1   |
| DG | ATP2A1   |
| DG | ATP6V1C1 |
| DG | ATP8A1   |
| DG | AZIN2    |
| DG | B2M      |
| DG | B3GAT1   |
| DG | BAAT     |
| DG | BBOX1    |
| DG | BCAT1    |
| DG | BCAT2    |
| DG | BGLAP    |
| DG | BHMT     |
| DG | BHMT2    |
| DG | BPI      |
| DG | CAD      |
| DG | CAMP     |
| DG | CARS     |
| DG | CARS2    |
| DG | CBS      |
| DG | CCBL1    |
| DG | CCBL2    |
| DG | CDO-1    |
| DG | CDO1     |



|    |        |
|----|--------|
| DG | CKM    |
| DG | CLPP   |
| DG | COMT   |
| DG | COX4I1 |
| DG | COX5A  |
| DG | COX5B  |
| DG | COX6A2 |
| DG | COX6B1 |
| DG | COX6C  |
| DG | COX7A1 |
| DG | COX7B  |
| DG | COX7C  |
| DG | COX8A  |
| DG | CPA1   |
| DG | CPQ    |
| DG | CRH    |
| DG | CSAD   |
| DG | CTH    |
| DG | CTNS   |
| DG | CTPS1  |
| DG | CTRB1  |
| DG | CTSB   |
| DG | CTSD   |
| DG | CXCL10 |
| DG | CYP2B6 |
| DG | CYTH2  |
| DG | DAO    |
| DG | DARS   |
| DG | DARS2  |
| DG | DDX6   |
| DG | DGKD   |
| DG | DGKG   |
| DG | DHODH  |
| DG | DNPEP  |
| DG | DPP4   |
| DG | DPYD   |
| DG | DRD1   |
| DG | DRD2   |
| DG | DRD3   |
| DG | DRD4   |
| DG | DRD5   |
| DG | E      |
| DG | EARS2  |
| DG | EGF    |
| DG | ENOPH1 |
| DG | ENPEP  |
| DG | EPOR   |
| DG | EPRS   |
| DG | ESR1   |
| DG | ESR2   |
| DG | F10    |

|    |        |
|----|--------|
| DG | F2     |
| DG | FAAH   |
| DG | FARS2  |
| DG | FARSA  |
| DG | FARSB  |
| DG | FHIT   |
| DG | FOLH1  |
| DG | FPGS   |
| DG | FTCD   |
| DG | GABRA1 |
| DG | GABRA2 |
| DG | GABRA3 |
| DG | GABRA4 |
| DG | GABRA5 |
| DG | GABRA6 |
| DG | GABRB1 |
| DG | GABRB2 |
| DG | GABRB3 |
| DG | GABRD  |
| DG | GABRE  |
| DG | GABRG1 |
| DG | GABRG2 |
| DG | GABRG3 |
| DG | GABRP  |
| DG | GABRQ  |
| DG | GAD1   |
| DG | GAD2   |
| DG | GAMT   |
| DG | GARS   |
| DG | GATB   |
| DG | GATM   |
| DG | GCAT   |
| DG | GCK    |
| DG | GCLC   |
| DG | GCLM   |
| DG | GCSH   |
| DG | GGCX   |
| DG | GIG18  |
| DG | GLDC   |
| DG | GLRA1  |
| DG | GLRA2  |
| DG | GLRA3  |
| DG | GLRB   |
| DG | GLS    |
| DG | GLS2   |
| DG | GLT6D1 |
| DG | GLTP   |
| DG | GLUD1  |
| DG | GLUD2  |
| DG | GLUL   |
| DG | GLYAT  |

|    |         |
|----|---------|
| DG | GLYATL1 |
| DG | GLYATL2 |
| DG | GM2A    |
| DG | GMPS    |
| DG | GNMT    |
| DG | GNPDA1  |
| DG | GOT1    |
| DG | GOT2    |
| DG | GPI     |
| DG | GPR18   |
| DG | GPT     |
| DG | GPT2    |
| DG | GRIA1   |
| DG | GRIA2   |
| DG | GRIA3   |
| DG | GRIA4   |
| DG | GRID1   |
| DG | GRID2   |
| DG | GRIK1   |
| DG | GRIK2   |
| DG | GRIK3   |
| DG | GRIK4   |
| DG | GRIK5   |
| DG | GRIN1   |
| DG | GRIN2A  |
| DG | GRIN2B  |
| DG | GRIN2C  |
| DG | GRIN2D  |
| DG | GRIN3A  |
| DG | GRIN3B  |
| DG | GRM1    |
| DG | GRM4    |
| DG | GRM7    |
| DG | GRM8    |
| DG | GSS     |
| DG | GSTM1   |
| DG | GSTP1   |
| DG | HA      |
| DG | HAL     |
| DG | HARS    |
| DG | HBA1    |
| DG | HBB     |
| DG | HCAR2   |
| DG | HCAR3   |
| DG | HDC     |
| DG | HIF1AN  |
| DG | HK1     |
| DG | HLA-B   |
| DG | HNF1A   |
| DG | HPGDS   |
| DG | HSD17B1 |

|    |          |
|----|----------|
| DG | HSD17B6  |
| DG | IARS     |
| DG | IARS2    |
| DG | IFNB1    |
| DG | IGF2R    |
| DG | IGHG1    |
| DG | IL4I1    |
| DG | INS      |
| DG | ISYNA1   |
| DG | ITPR1    |
| DG | IYD      |
| DG | KARS     |
| DG | KRTAP5-2 |
| DG | KRTAP5-3 |
| DG | KYNU     |
| DG | L3HYPDH  |
| DG | LARS     |
| DG | LARS2    |
| DG | LCMT1    |
| DG | LCMT2    |
| DG | LCTL     |
| DG | LGALS2   |
| DG | LGALS7   |
| DG | LGSN     |
| DG | LIP3     |
| DG | LSS      |
| DG | LYZ      |
| DG | M6PR     |
| DG | MB       |
| DG | ME2      |
| DG | METAP2   |
| DG | MGMT     |
| DG | MIF      |
| DG | MT-CO1   |
| DG | MT-CO2   |
| DG | MT-CO3   |
| DG | MT-ND1   |
| DG | MTAP     |
| DG | MTR      |
| DG | MTRR     |
| DG | MTPP     |
| DG | NADSYN1  |
| DG | NAGA     |
| DG | NAGS     |
| DG | NCAN     |
| DG | NCOA2    |
| DG | NFS1     |
| DG | NME1     |
| DG | NNMT     |
| DG | NOS1     |
| DG | NOS2     |

|    |         |
|----|---------|
| DG | NOS3    |
| DG | NPY     |
| DG | NR1I2   |
| DG | NR1I3   |
| DG | NR3C1   |
| DG | NR5A1   |
| DG | NUDT9   |
| DG | OAT     |
| DG | OAZ1    |
| DG | OAZ2    |
| DG | OAZ3    |
| DG | ODC1    |
| DG | OPLAH   |
| DG | OTC     |
| DG | OXCT1   |
| DG | OXCT2   |
| DG | P2RY12  |
| DG | P3H1    |
| DG | P3H2    |
| DG | P3H3    |
| DG | P4HA1   |
| DG | P4HA2   |
| DG | P5CR2   |
| DG | PAEP    |
| DG | PAH     |
| DG | PAICS   |
| DG | PAPSS1  |
| DG | PARS2   |
| DG | PCCB    |
| DG | PCTP    |
| DG | PECR    |
| DG | PFAS    |
| DG | PGM1    |
| DG | PGR     |
| DG | PHYKPL  |
| DG | PIM1    |
| DG | PIN1    |
| DG | PIPOX   |
| DG | PISD    |
| DG | PITPNA  |
| DG | PKIA    |
| DG | PLA2G1B |
| DG | PLA2G2A |
| DG | PLA2G2E |
| DG | PLOD1   |
| DG | PLOD3   |
| DG | PON1    |
| DG | PPARA   |
| DG | PPAT    |
| DG | PPIA    |
| DG | PPIB    |

|    |          |
|----|----------|
| DG | PPIC     |
| DG | PIIF     |
| DG | PPIG     |
| DG | PPIH     |
| DG | PPP1CC   |
| DG | PRKACA   |
| DG | PRKCA    |
| DG | PROCR    |
| DG | PRODH    |
| DG | PROSC    |
| DG | PRSS1    |
| DG | PSAP     |
| DG | PSAT1    |
| DG | PTDSS1   |
| DG | PTDSS2   |
| DG | PTGIR    |
| DG | PTGIS    |
| DG | PTGS1    |
| DG | PTGS2    |
| DG | PTH      |
| DG | PTPN1    |
| DG | PYCR1    |
| DG | PYCR2    |
| DG | PYCRL    |
| DG | PYGL     |
| DG | PYGM     |
| DG | QPRT     |
| DG | RABGGTA  |
| DG | RABGGTB  |
| DG | RHO      |
| DG | RNASE1   |
| DG | RORA     |
| DG | RTCB     |
| DG | S100B    |
| DG | S100G    |
| DG | SARS     |
| DG | SCARB1   |
| DG | SCN2A    |
| DG | SCN4A    |
| DG | SDHA     |
| DG | SDHB     |
| DG | SDHC     |
| DG | SDHD     |
| DG | SDS      |
| DG | SERPINB3 |
| DG | SERPINC1 |
| DG | SFTPD    |
| DG | SHMT1    |
| DG | SHMT2    |
| DG | SIGLEC1  |
| DG | SIGMAR1  |

|    |          |
|----|----------|
| DG | SLC13A1  |
| DG | SLC13A2  |
| DG | SLC13A3  |
| DG | SLC19A3  |
| DG | SLC1A1   |
| DG | SLC1A2   |
| DG | SLC1A3   |
| DG | SLC1A4   |
| DG | SLC1A6   |
| DG | SLC1A7   |
| DG | SLC25A10 |
| DG | SLC25A12 |
| DG | SLC25A13 |
| DG | SLC25A15 |
| DG | SLC25A18 |
| DG | SLC25A2  |
| DG | SLC25A22 |
| DG | SLC25A4  |
| DG | SLC32A1  |
| DG | SLC36A1  |
| DG | SLC38A3  |
| DG | SLC3A1   |
| DG | SLC6A14  |
| DG | SLC6A5   |
| DG | SLC6A7   |
| DG | SLC6A9   |
| DG | SLC7A1   |
| DG | SLC7A11  |
| DG | SLC7A2   |
| DG | SLC7A3   |
| DG | SLC7A4   |
| DG | SLC7A8   |
| DG | SLC7A9   |
| DG | SMARCA5  |
| DG | SMPD3    |
| DG | SMPD4    |
| DG | SOAT1    |
| DG | SOAT2    |
| DG | SOD2     |
| DG | SPTLC1   |
| DG | SPTLC2   |
| DG | SP_1951  |
| DG | SRC      |
| DG | SRD5A2   |
| DG | SRPK2    |
| DG | SRR      |
| DG | SUCLA2   |
| DG | SUCLG1   |
| DG | SUCLG2   |
| DG | SUCNR1   |
| DG | SULT2A1  |

|    |         |
|----|---------|
| DG | SULT2B1 |
| DG | TARS    |
| DG | TARS2   |
| DG | TAT     |
| DG | TGFBR2  |
| DG | TH      |
| DG | THNSL1  |
| DG | TMLHE   |
| DG | TPI1    |
| DG | TRDMT1  |
| DG | TREM1   |
| DG | TUB     |
| DG | TYMS    |
| DG | TYR     |
| DG | UBC     |
| DG | UCKL1   |
| DG | VARS    |
| DG | VDR     |
| DG | WARS    |
| DG | WARS2   |
| DG | XDH     |
| DG | YARS    |
| DG | YARS2   |
| DG | YWHAE   |
| DG | ABFA    |
| DG | AGLA    |
| DG | ALGC    |
| DG | ALGD    |
| DG | ALSB    |
| DG | AMPC    |
| DG | AMS     |
| DG | AMY     |
| DG | AMYA    |
| DG | AMYE    |
| DG | AMYM    |
| DG | AMYP    |
| DG | ANSB    |
| DG | AQPZ    |
| DG | ARAC    |
| DG | ARAF    |
| DG | ARGB    |
| DG | ARGG    |
| DG | AROB    |
| DG | ASPA    |
| DG | ASPC    |
| DG | ATPE    |
| DG | ATPF    |
| DG | ATPH    |
| DG | ATSA    |
| DG | BFR     |
| DG | BGL3    |



|    |             |
|----|-------------|
| DG | BGLA        |
| DG | BGLT        |
| DG | BLA         |
| DG | BLACTX-M-14 |
| DG | BLACTX-M-27 |
| DG | BLACTX-M-9A |
| DG | BOTB        |
| DG | BUDC        |
| DG | CAMC        |
| DG | CBHA        |
| DG | CC4         |
| DG | CEL5A       |
| DG | CELA        |
| DG | CELA1       |
| DG | CELB        |
| DG | CELC307     |
| DG | CELCCF      |
| DG | CELCCG      |
| DG | CELD        |
| DG | CELS        |
| DG | CENC        |
| DG | CEX         |
| DG | CFT         |
| DG | CGT         |
| DG | CHOB        |
| DG | COBT        |
| DG | CS1         |
| DG | CSLB        |
| DG | CTXB        |
| DG | DADX        |
| DG | DAPA        |
| DG | DAPD        |
| DG | DCTD        |
| DG | DDH         |
| DG | DEOA        |
| DG | DHAK        |
| DG | DLGD        |
| DG | DMSA        |
| DG | EBGA        |
| DG | ECO         |
| DG | ENGF        |
| DG | ENO         |
| DG | ENTB        |
| DG | ENV         |
| DG | FABI        |
| DG | FDHF        |
| DG | FHUA        |
| DG | FMT         |
| DG | FTSI        |
| DG | FUCI        |
| DG | GADA        |

|    |         |
|----|---------|
| DG | GAG-POL |
| DG | GALM    |
| DG | GANB    |
| DG | GDHB    |
| DG | GFO     |
| DG | GLCB    |
| DG | GLK     |
| DG | GLMS    |
| DG | GLPF    |
| DG | GLPG    |
| DG | GLVA    |
| DG | GPT     |
| DG | GSHA    |
| DG | GUDD    |
| DG | HEMB    |
| DG | HISD    |
| DG | HLD     |
| DG | HMP     |
| DG | HMUO    |
| DG | HUTH    |
| DG | ICD     |
| DG | ILVE    |
| DG | KBL     |
| DG | KSI     |
| DG | LACG    |
| DG | LACZ    |
| DG | LAMB    |
| DG | LECB    |
| DG | LEUB    |
| DG | LGTC    |
| DG | LINB    |
| DG | LPXA    |
| DG | LUXS    |
| DG | LYSA    |
| DG | MAF     |
| DG | MALE    |
| DG | MALP    |
| DG | MENC    |
| DG | METE    |
| DG | MEXA    |
| DG | MGLB    |
| DG | MOXC    |
| DG | MRCA    |
| DG | MRCB    |
| DG | MRDA    |
| DG | MRSA    |
| DG | MTNN    |
| DG | MURA    |
| DG | MURE    |
| DG | MURI    |
| DG | MUTL    |

|    |       |
|----|-------|
| DG | MUTY  |
| DG | MXIM  |
| DG | NAHD  |
| DG | NARG  |
| DG | NARH  |
| DG | NARI  |
| DG | NEDA  |
| DG | NIKA  |
| DG | NOS   |
| DG | NPLT  |
| DG | NPRS  |
| DG | NRDB  |
| DG | NTPK  |
| DG | OPPA  |
| DG | OTSA  |
| DG | PAB   |
| DG | PBP1B |
| DG | PBP2A |
| DG | PBP3  |
| DG | PBPA  |
| DG | PBPC  |
| DG | PCP   |
| DG | PDP   |
| DG | PENA  |
| DG | PFLB  |
| DG | PGMB  |
| DG | PHNA  |
| DG | PHR   |
| DG | PLC   |
| DG | POBA  |
| DG | POL   |
| DG | POLA  |
| DG | PPGMK |
| DG | PTD   |
| DG | PUFC  |
| DG | PUFL  |
| DG | PUFM  |
| DG | PUHA  |
| DG | PURF  |
| DG | PURR  |
| DG | PYP   |
| DG | PYRC  |
| DG | PYRD  |
| DG | PYRDA |
| DG | PYRE  |
| DG | RADH  |
| DG | RBSK  |
| DG | RHAA  |
| DG | RMLC  |
| DG | RSUA  |
| DG | RUB   |

|    |         |
|----|---------|
| DG | RUVB    |
| DG | SACB    |
| DG | SCRY    |
| DG | SDSA1   |
| DG | SERA    |
| DG | SHP     |
| DG | SPG     |
| DG | SPOII   |
| DG | STX2EB  |
| DG | STXB    |
| DG | SUFS    |
| DG | TALB    |
| DG | TESA    |
| DG | TETX    |
| DG | TREZ    |
| DG | TRPS    |
| DG | TRPS2   |
| DG | TRXB    |
| DG | TVAI    |
| DG | TVAII   |
| DG | TYRS    |
| DG | UBIC    |
| DG | UDG     |
| DG | ULAG    |
| DG | UNG     |
| DG | XLNA    |
| DG | XYLA    |
| DG | XYNA    |
| DG | XYNY    |
| DG | XYNZ    |
| DG | ZWF     |
| DS | 72      |
| DS | ACO2    |
| DS | ADH1C   |
| DS | AKR1C1  |
| DS | AKR1C2  |
| DS | AKR1D1  |
| DS | ALAD    |
| DS | ALDH5A1 |
| DS | ALOX5   |
| DS | AR      |
| DS | ASPH    |
| DS | ATP1A1  |
| DS | ATP5A1  |
| DS | ATP5B   |
| DS | ATP5C1  |
| DS | BBOX1   |
| DS | BGLAP   |
| DS | CA1     |
| DS | CA12    |
| DS | CA14    |

|    |                |
|----|----------------|
| DS | CA2            |
| DS | CA3            |
| DS | CA4            |
| DS | CA5A           |
| DS | CA5B           |
| DS | CA6            |
| DS | CA7            |
| DS | CA9            |
| DS | CDA            |
| DS | CDK6           |
| DS | CES1           |
| DS | COMT           |
| DS | COX4I1         |
| DS | COX5A          |
| DS | COX5B          |
| DS | COX6A2         |
| DS | COX6B1         |
| DS | COX6C          |
| DS | COX7A1         |
| DS | COX7B          |
| DS | COX7C          |
| DS | COX8A          |
| DS | CSNK2A1        |
| DS | DGKA           |
| DS | DKFZP686P18130 |
| DS | EFTUD1         |
| DS | ESR1           |
| DS | ESR2           |
| DS | ESRRG          |
| DS | F10            |
| DS | F2             |
| DS | F7             |
| DS | F9             |
| DS | FABP6          |
| DS | FECH           |
| DS | GABRA1         |
| DS | GABRA2         |
| DS | GABRA3         |
| DS | GABRA4         |
| DS | GABRA5         |
| DS | GABRA6         |
| DS | GABRB1         |
| DS | GABRB2         |
| DS | GABRB3         |
| DS | GABRD          |
| DS | GABRE          |
| DS | GABRG1         |
| DS | GABRG2         |
| DS | GABRG3         |
| DS | GABRP          |
| DS | GABRQ          |

|    |         |
|----|---------|
| DS | GGCX    |
| DS | GLRA3   |
| DS | GRIN1   |
| DS | GRIN2A  |
| DS | GRIN2B  |
| DS | GRIN2C  |
| DS | GRIN2D  |
| DS | GRIN3A  |
| DS | GRIN3B  |
| DS | HBA1    |
| DS | HBB     |
| DS | HCK     |
| DS | HIBCH   |
| DS | HMGCR   |
| DS | HSD11B1 |
| DS | HSD17B1 |
| DS | HSD17B6 |
| DS | IGHG1   |
| DS | IGHG2   |
| DS | ITGB2   |
| DS | LCN2    |
| DS | LIP3    |
| DS | LSS     |
| DS | MIF     |
| DS | MT-CO1  |
| DS | MT-CO2  |
| DS | MT-CO3  |
| DS | NCOA1   |
| DS | NCOA2   |
| DS | NQO1    |
| DS | NQO2    |
| DS | NR1H4   |
| DS | NR1I2   |
| DS | NR1I3   |
| DS | NR3C1   |
| DS | NR3C2   |
| DS | OXCT1   |
| DS | OXCT2   |
| DS | P3H1    |
| DS | P3H2    |
| DS | P3H3    |
| DS | P4HA1   |
| DS | P4HA2   |
| DS | PGR     |
| DS | PIK3CA  |
| DS | PIK3CG  |
| DS | PIK3R1  |
| DS | PIM1    |
| DS | PLA2G1B |
| DS | PLK1    |
| DS | PLOD1   |

|    |          |
|----|----------|
| DS | PLOD3    |
| DS | PPARA    |
| DS | PPP1CC   |
| DS | PPP2CA   |
| DS | PPP2CB   |
| DS | PRKACA   |
| DS | PRKCA    |
| DS | PRKCB    |
| DS | PRLR     |
| DS | PROC     |
| DS | PROS1    |
| DS | PROZ     |
| DS | PTGS1    |
| DS | PTK2B    |
| DS | PYGM     |
| DS | RORA     |
| DS | SDHA     |
| DS | SDHB     |
| DS | SDHC     |
| DS | SDHD     |
| DS | SEC14L2  |
| DS | SEC14L3  |
| DS | SEC14L4  |
| DS | SIGMAR1  |
| DS | SLC13A1  |
| DS | SLC13A2  |
| DS | SLC13A3  |
| DS | SLC25A10 |
| DS | SQLE     |
| DS | SRD5A2   |
| DS | STK17B   |
| DS | SUCLA2   |
| DS | SUCLG1   |
| DS | SUCLG2   |
| DS | SUCNR1   |
| DS | SULT2A1  |
| DS | SULT2B1  |
| DS | SYK      |
| DS | TMLHE    |
| DS | TOP2A    |
| DS | TYR      |
| DS | UGT3A1   |
| DS | VDR      |
| DS | VKORC1   |
| DS | VKORC1L1 |
| DS | YWHAE    |
| DS | ACRB     |
| DS | ACT11    |
| DS | ALDA     |
| DS | ASPC     |
| DS | BPHC     |

|    |         |
|----|---------|
| DS | CAT     |
| DS | CAT3    |
| DS | CATA    |
| DS | CBH     |
| DS | CCRA    |
| DS | CHOB    |
| DS | COBT    |
| DS | CTAC    |
| DS | CTAD    |
| DS | DAPD    |
| DS | DHBE    |
| DS | DOXG    |
| DS | FABZ    |
| DS | FRDA    |
| DS | FRDB    |
| DS | FRDC    |
| DS | FUSA    |
| DS | GADA    |
| DS | GAG-POL |
| DS | HEMB    |
| DS | HUTH    |
| DS | ILVE    |
| DS | KSI     |
| DS | MNDD    |
| DS | MVAA    |
| DS | NAHD    |
| DS | NCSA    |
| DS | PAC     |
| DS | PCAG    |
| DS | PCAH    |
| DS | POLA    |
| DS | PPCA    |
| DS | PYP     |
| DS | TRXB    |
| DS | TTGR    |
| DS | UBIC    |
| DS | XYNY    |
| DS | XYNZ    |
| GC | 72      |
| GC | 9       |
| GC | AADACL2 |
| GC | ABO     |
| GC | ACHE    |
| GC | ADCY2   |
| GC | ADCY5   |
| GC | ADH1C   |
| GC | AKR1C1  |
| GC | AKR1C2  |
| GC | AKR1C3  |
| GC | AKR1D1  |
| GC | ALDH2   |



|    |                |
|----|----------------|
| GC | ALOX5          |
| GC | AMY1A          |
| GC | AMY2A          |
| GC | AMY2B          |
| GC | ANXA1          |
| GC | APH1A          |
| GC | AR             |
| GC | ARG1           |
| GC | ATP1A1         |
| GC | ATP5A1         |
| GC | ATP5B          |
| GC | ATP5C1         |
| GC | BCHE           |
| GC | CA2            |
| GC | CDA            |
| GC | CDIPT          |
| GC | CDK6           |
| GC | CES1           |
| GC | CHRM2          |
| GC | CHRNA1         |
| GC | CHRNA10        |
| GC | CHRNA2         |
| GC | CHRNA3         |
| GC | CHRNA4         |
| GC | CHRNA5         |
| GC | CHRNA6         |
| GC | CHRNA7         |
| GC | CHRNA9         |
| GC | CHRNB1         |
| GC | CHRNB2         |
| GC | CHRNB3         |
| GC | CHRNB4         |
| GC | CHRND          |
| GC | CHRNE          |
| GC | CHRNG          |
| GC | COMT           |
| GC | COX4I1         |
| GC | COX5A          |
| GC | COX5B          |
| GC | COX6A2         |
| GC | COX6B1         |
| GC | COX6C          |
| GC | COX7A1         |
| GC | COX7B          |
| GC | COX7C          |
| GC | COX8A          |
| GC | CSNK2A1        |
| GC | CTNNB1         |
| GC | CYP27B1        |
| GC | DKFZP686P18130 |
| GC | DRD2           |

|    |          |
|----|----------|
| GC | EDNRA    |
| GC | EFTUD1   |
| GC | ESR1     |
| GC | ESR2     |
| GC | ESRRG    |
| GC | FABP6    |
| GC | FECH     |
| GC | GABRA1   |
| GC | GABRA2   |
| GC | GABRA3   |
| GC | GABRA4   |
| GC | GABRA5   |
| GC | GABRA6   |
| GC | GABRB1   |
| GC | GABRB2   |
| GC | GABRB3   |
| GC | GABRD    |
| GC | GABRE    |
| GC | GABRG1   |
| GC | GABRG2   |
| GC | GABRG3   |
| GC | GABRP    |
| GC | GABRQ    |
| GC | GAPDHS   |
| GC | GBA      |
| GC | GCK      |
| GC | GLO1     |
| GC | GLRA3    |
| GC | GLT6D1   |
| GC | GLTP     |
| GC | GNAS     |
| GC | GNPDA1   |
| GC | GRIN1    |
| GC | GRIN2A   |
| GC | GRIN2B   |
| GC | GRIN2C   |
| GC | GRIN2D   |
| GC | GRIN3A   |
| GC | GRIN3B   |
| GC | HCK      |
| GC | HIBCH    |
| GC | HK1      |
| GC | HMGCR    |
| GC | HSD11B1  |
| GC | HSD17B1  |
| GC | HSD17B11 |
| GC | HSPA5    |
| GC | HTR2A    |
| GC | HTR3A    |
| GC | IFNB1    |
| GC | IGHG1    |

|    |          |
|----|----------|
| GC | IGHG2    |
| GC | IKBKB    |
| GC | ITGB2    |
| GC | KRTAP5-2 |
| GC | KRTAP5-3 |
| GC | LCN2     |
| GC | LCT      |
| GC | LCTL     |
| GC | LGALS2   |
| GC | LGALS7   |
| GC | LIP3     |
| GC | LSS      |
| GC | MAN1B1   |
| GC | MAN2A1   |
| GC | MB       |
| GC | MBL2     |
| GC | MED1     |
| GC | MSDC     |
| GC | MT-CO1   |
| GC | MT-CO2   |
| GC | MT-CO3   |
| GC | MTTP     |
| GC | NCAN     |
| GC | NCOA1    |
| GC | NCOA2    |
| GC | NFKB1    |
| GC | NFKB2    |
| GC | NFKBIA   |
| GC | NOS2     |
| GC | NR0B1    |
| GC | NR1H4    |
| GC | NR1I2    |
| GC | NR1I3    |
| GC | NR3C1    |
| GC | NR3C2    |
| GC | NUDT9    |
| GC | OPRD1    |
| GC | OPRK1    |
| GC | OPRM1    |
| GC | PGR      |
| GC | PIK3CG   |
| GC | PIM1     |
| GC | PLA2G1B  |
| GC | PLA2G2E  |
| GC | PPARA    |
| GC | PPP1CC   |
| GC | PRKAA1   |
| GC | PRKAA2   |
| GC | PRKAB1   |
| GC | PRKAB2   |
| GC | PRKAG1   |

|    |         |
|----|---------|
| GC | PRKAG2  |
| GC | PRKAG3  |
| GC | PRLR    |
| GC | PSENN   |
| GC | PTGS1   |
| GC | PTGS2   |
| GC | PTK2B   |
| GC | PYGL    |
| GC | PYGM    |
| GC | RORA    |
| GC | RPS6KA3 |
| GC | SFTPD   |
| GC | SIGLEC1 |
| GC | SIGMAR1 |
| GC | SLC18A2 |
| GC | SMARCA5 |
| GC | SOAT1   |
| GC | SOAT2   |
| GC | STK17B  |
| GC | SULT2A1 |
| GC | SULT2B1 |
| GC | TOP2A   |
| GC | TP53    |
| GC | UGT3A1  |
| GC | VDR     |
| GC | YWHAE   |
| GC | ACRB    |
| GC | ACTIII  |
| GC | AGLA    |
| GC | AGUA    |
| GC | ALDA    |
| GC | ALSB    |
| GC | AMS     |
| GC | AMY     |
| GC | AMYA    |
| GC | AMYE    |
| GC | AMYM    |
| GC | AMYP    |
| GC | ASPA    |
| GC | BGLA    |
| GC | BOTB    |
| GC | BUDC    |
| GC | CAT     |
| GC | CAT3    |
| GC | CBH     |
| GC | CEL5A   |
| GC | CELA    |
| GC | CELA1   |
| GC | CELB    |
| GC | CELC307 |
| GC | CELCCF  |

|    |          |
|----|----------|
| GC | CELCCG   |
| GC | CELD     |
| GC | CELS     |
| GC | CENC     |
| GC | CEX      |
| GC | CGT      |
| GC | CHOB     |
| GC | CSLA     |
| GC | CSLB     |
| GC | CTAC     |
| GC | CTAD     |
| GC | CTXB     |
| GC | CYP158A2 |
| GC | DMSA     |
| GC | ECO      |
| GC | ENGF     |
| GC | ENTB     |
| GC | ETHR     |
| GC | FABG3    |
| GC | FABI     |
| GC | FABZ     |
| GC | FHUA     |
| GC | FOLA     |
| GC | FUSA     |
| GC | GAG-POL  |
| GC | GALM     |
| GC | GANB     |
| GC | GDHB     |
| GC | GFO      |
| GC | GLK      |
| GC | KSI      |
| GC | LACZ     |
| GC | LAMB     |
| GC | LECB     |
| GC | LGTC     |
| GC | MALE     |
| GC | MALP     |
| GC | MGLB     |
| GC | MOXC     |
| GC | MUTY     |
| GC | MVAA     |
| GC | NAHD     |
| GC | NCSA     |
| GC | NEDA     |
| GC | NPLT     |
| GC | PLCA     |
| GC | PPCA     |
| GC | PPGMK    |
| GC | PUNA     |
| GC | RBSB     |
| GC | RBSD     |

|    |          |
|----|----------|
| GC | SPOII    |
| GC | STX2EB   |
| GC | STXB     |
| GC | TETX     |
| GC | TREZ     |
| GC | TTGR     |
| GC | TVAI     |
| GC | TVAII    |
| GC | UBIC     |
| GC | XLNA     |
| GC | XYL      |
| GC | XYLA     |
| GC | XYN10C   |
| GC | XYNA     |
| GC | XYNC     |
| GC | XYNY     |
| GC | XYNZ     |
| GC | YEDY     |
| HH | AASS     |
| HH | ABAT     |
| HH | ABL1     |
| HH | ACADSB   |
| HH | ACOT13   |
| HH | ACOX1    |
| HH | ACSL3    |
| HH | ACSL4    |
| HH | ADH1B    |
| HH | ADRA2A   |
| HH | AKR1C1   |
| HH | AKR1C2   |
| HH | ALDH1A1  |
| HH | ALDH1A2  |
| HH | ALDH5A1  |
| HH | APH1A    |
| HH | AR       |
| HH | ARF1     |
| HH | ARF6     |
| HH | ARG1     |
| HH | ARG2     |
| HH | ATP1A1   |
| HH | ATP6V1C1 |
| HH | B3GAT1   |
| HH | CALM1    |
| HH | CDA      |
| HH | CTRB1    |
| HH | CYP27B1  |
| HH | CYP2C8   |
| HH | DAO      |
| HH | DBI      |
| HH | DDC      |
| HH | DDX6     |

|    |        |
|----|--------|
| HH | DRD1   |
| HH | DRD2   |
| HH | DRD3   |
| HH | DRD4   |
| HH | DRD5   |
| HH | ECI2   |
| HH | ELOVL4 |
| HH | EPOR   |
| HH | ESR1   |
| HH | ESR2   |
| HH | FADS1  |
| HH | FADS2  |
| HH | FFAR1  |
| HH | FKBP1A |
| HH | FURIN  |
| HH | GABRA1 |
| HH | GABRA2 |
| HH | GABRA3 |
| HH | GABRA4 |
| HH | GABRA5 |
| HH | GABRA6 |
| HH | GABRB1 |
| HH | GABRB2 |
| HH | GABRB3 |
| HH | GABRD  |
| HH | GABRE  |
| HH | GABRG1 |
| HH | GABRG2 |
| HH | GABRG3 |
| HH | GABRP  |
| HH | GABRQ  |
| HH | GATM   |
| HH | GLRA3  |
| HH | GLTP   |
| HH | GM2A   |
| HH | GPRC5A |
| HH | GRIN1  |
| HH | GRIN2A |
| HH | GRIN2B |
| HH | GRIN2C |
| HH | GRIN2D |
| HH | GRIN3A |
| HH | GRIN3B |
| HH | GSTP1  |
| HH | GUCA1A |
| HH | HAO1   |
| HH | HDAC2  |
| HH | HDAC9  |
| HH | HIF1AN |
| HH | HNF4A  |
| HH | HNF4G  |

|    |         |
|----|---------|
| HH | HPGDS   |
| HH | HSD17B1 |
| HH | IGHG1   |
| HH | IGHG2   |
| HH | IGKC    |
| HH | INS     |
| HH | ISYNA1  |
| HH | ITPR1   |
| HH | IYD     |
| HH | KARS    |
| HH | LALBA   |
| HH | LCN2    |
| HH | LCN9    |
| HH | LIP3    |
| HH | LSS     |
| HH | LY96    |
| HH | MIF     |
| HH | MT1417  |
| HH | NAGA    |
| HH | NCOA1   |
| HH | NCOA2   |
| HH | NR0B1   |
| HH | NR1I2   |
| HH | NR1I3   |
| HH | NR3C1   |
| HH | OAT     |
| HH | OAZ1    |
| HH | OAZ2    |
| HH | OAZ3    |
| HH | ODC1    |
| HH | OGDH    |
| HH | OTC     |
| HH | PAEP    |
| HH | PAPSS1  |
| HH | PGR     |
| HH | PKIA    |
| HH | PLA2G1B |
| HH | PLA2G2A |
| HH | PLA2G2D |
| HH | PLA2G2E |
| HH | PMP2    |
| HH | PPARA   |
| HH | PPARD   |
| HH | PPARG   |
| HH | PPP1CC  |
| HH | PPP3CA  |
| HH | PPP3R1  |
| HH | PPT1    |
| HH | PRKACA  |
| HH | PRSS1   |
| HH | PSENN   |



|    |          |
|----|----------|
| HH | PTGS1    |
| HH | PTGS2    |
| HH | PVR      |
| HH | RARA     |
| HH | RARB     |
| HH | RARG     |
| HH | RARRES1  |
| HH | RCVRN    |
| HH | RHO      |
| HH | RORA     |
| HH | RXRA     |
| HH | RXRB     |
| HH | RXRG     |
| HH | RV0233   |
| HH | S100B    |
| HH | SCN10A   |
| HH | SCN11A   |
| HH | SCN1A    |
| HH | SCN1B    |
| HH | SCN2A    |
| HH | SCN2B    |
| HH | SCN3A    |
| HH | SCN3B    |
| HH | SCN4A    |
| HH | SCN4B    |
| HH | SCN5A    |
| HH | SCN7A    |
| HH | SCN8A    |
| HH | SCN9A    |
| HH | SEC14L2  |
| HH | SIGMAR1  |
| HH | SLC25A15 |
| HH | SLC25A2  |
| HH | SLC7A1   |
| HH | SLC7A2   |
| HH | SLC7A3   |
| HH | SLC7A4   |
| HH | SLC8A1   |
| HH | SOD2     |
| HH | SP_1951  |
| HH | SULT2A1  |
| HH | SULT2B1  |
| HH | TAT      |
| HH | TGFBR2   |
| HH | TH       |
| HH | TLR4     |
| HH | TRAPPC3  |
| HH | TRDMT1   |
| HH | TREM1    |
| HH | TRPV1    |
| HH | VDR      |

|    |          |
|----|----------|
| HH | YARS     |
| HH | YARS2    |
| HH | YWHAE    |
| HH | ANSB     |
| HH | ARGG     |
| HH | AROQ     |
| HH | ASPC     |
| HH | BFR      |
| HH | BGLA     |
| HH | BPHC     |
| HH | CATA     |
| HH | CC4      |
| HH | CELCCF   |
| HH | CELCCG   |
| HH | CHOB     |
| HH | COBT     |
| HH | CUMD     |
| HH | CYP102A1 |
| HH | CYPC     |
| HH | DADX     |
| HH | DAPA     |
| HH | DCTD     |
| HH | DHBE     |
| HH | DLGD     |
| HH | DOXG     |
| HH | ENO      |
| HH | ENV      |
| HH | EST      |
| HH | FABB     |
| HH | FADR     |
| HH | FHUA     |
| HH | FUCI     |
| HH | GAG      |
| HH | GAG-POL  |
| HH | GLCB     |
| HH | GLPF     |
| HH | HISD     |
| HH | HUTH     |
| HH | KCSA     |
| HH | KSI      |
| HH | LIPB     |
| HH | LPXA     |
| HH | LPXC     |
| HH | LUXF     |
| HH | LUXS     |
| HH | LYSA     |
| HH | MALE     |
| HH | MDLB     |
| HH | METE     |
| HH | MEXA     |
| HH | MNDD     |

|    |         |
|----|---------|
| HH | MUTL    |
| HH | MUTY    |
| HH | NAHD    |
| HH | NEF     |
| HH | NIKA    |
| HH | NRDB    |
| HH | PAB     |
| HH | PAC     |
| HH | PCAG    |
| HH | PCAH    |
| HH | PCP     |
| HH | PFLB    |
| HH | PHNA    |
| HH | PYP     |
| HH | RHAA    |
| HH | RMLC    |
| HH | SERA    |
| HH | TALB    |
| HH | TCP14   |
| HH | TESA    |
| HH | TONB    |
| HH | TYNA    |
| HH | TYRS    |
| HH | XYLA    |
| HH | XYNY    |
| HH | XYNZ    |
| JG | AKR1C1  |
| JG | AKR1C2  |
| JG | ALOX5   |
| JG | ANXA1   |
| JG | AR      |
| JG | ATP1A1  |
| JG | CDA     |
| JG | CYP27B1 |
| JG | ESR1    |
| JG | ESR2    |
| JG | GABRA1  |
| JG | GABRA2  |
| JG | GABRA3  |
| JG | GABRA4  |
| JG | GABRA5  |
| JG | GABRA6  |
| JG | GABRB1  |
| JG | GABRB2  |
| JG | GABRB3  |
| JG | GABRD   |
| JG | GABRE   |
| JG | GABRG1  |
| JG | GABRG2  |
| JG | GABRG3  |
| JG | GABRP   |

|    |         |
|----|---------|
| JG | GABRQ   |
| JG | GLRA3   |
| JG | GRIN1   |
| JG | GRIN2A  |
| JG | GRIN2B  |
| JG | GRIN2C  |
| JG | GRIN2D  |
| JG | GRIN3A  |
| JG | GRIN3B  |
| JG | HMGCR   |
| JG | HSD11B1 |
| JG | HSD17B1 |
| JG | LIP3    |
| JG | LSS     |
| JG | MED1    |
| JG | NCOA1   |
| JG | NCOA2   |
| JG | NOS2    |
| JG | NR0B1   |
| JG | NR1I2   |
| JG | NR1I3   |
| JG | NR3C1   |
| JG | NR3C2   |
| JG | PGR     |
| JG | PPARA   |
| JG | PPP1CC  |
| JG | PTGS1   |
| JG | RORA    |
| JG | SIGMAR1 |
| JG | SRD5A1  |
| JG | SULT2A1 |
| JG | SULT2B1 |
| JG | VDR     |
| JG | YWHAE   |
| JG | CAT     |
| JG | CAT3    |
| JG | CHOB    |
| JG | FUSA    |
| JG | KSI     |
| JG | MVAA    |
| NX | AADAT   |
| NX | AARS    |
| NX | AARS2   |
| NX | AASS    |
| NX | ABAT    |
| NX | ACY1    |
| NX | ACY3    |
| NX | ADH1B   |
| NX | ADH1C   |
| NX | ADSS    |
| NX | ADSSL1  |

|    |          |
|----|----------|
| NX | AGXT     |
| NX | AGXT2    |
| NX | AKR1C1   |
| NX | AKR1C2   |
| NX | ALAS1    |
| NX | ALAS2    |
| NX | ALDH18A1 |
| NX | ANXA1    |
| NX | AR       |
| NX | ARF1     |
| NX | ARG1     |
| NX | ARG2     |
| NX | ASL      |
| NX | ASNS     |
| NX | ASPA     |
| NX | ASPH     |
| NX | ASRGL1   |
| NX | ASS      |
| NX | ASS1     |
| NX | ATP6V1C1 |
| NX | AZIN2    |
| NX | B3GAT1   |
| NX | BAAT     |
| NX | BCAT1    |
| NX | BCAT2    |
| NX | BGLAP    |
| NX | BHMT     |
| NX | CAD      |
| NX | CAMP     |
| NX | CARS     |
| NX | CARS2    |
| NX | CBS      |
| NX | CCBL1    |
| NX | CCBL2    |
| NX | CDA      |
| NX | CDO-1    |
| NX | CDO1     |
| NX | CES1     |
| NX | CKM      |
| NX | COX4I1   |
| NX | COX5A    |
| NX | COX5B    |
| NX | COX6A2   |
| NX | COX6B1   |
| NX | COX6C    |
| NX | COX7A1   |
| NX | COX7B    |
| NX | COX7C    |
| NX | COX8A    |
| NX | CPA1     |
| NX | CPQ      |

|    |                |
|----|----------------|
| NX | CRH            |
| NX | CSAD           |
| NX | CTH            |
| NX | CTPS1          |
| NX | CTSB           |
| NX | CXCL10         |
| NX | DAO            |
| NX | DARS           |
| NX | DARS2          |
| NX | DDX6           |
| NX | DKFZP686P18130 |
| NX | DNPEP          |
| NX | DPP4           |
| NX | DRD1           |
| NX | DRD2           |
| NX | DRD3           |
| NX | DRD4           |
| NX | DRD5           |
| NX | E              |
| NX | EARS2          |
| NX | EFTUD1         |
| NX | EGF            |
| NX | ENPEP          |
| NX | EPOR           |
| NX | EPRS           |
| NX | ESR1           |
| NX | ESR2           |
| NX | ESRRG          |
| NX | F10            |
| NX | F2             |
| NX | FABP6          |
| NX | FARS2          |
| NX | FARSA          |
| NX | FARSB          |
| NX | FECH           |
| NX | FOLH1          |
| NX | FPGS           |
| NX | FTCD           |
| NX | GABRA1         |
| NX | GABRA2         |
| NX | GABRA3         |
| NX | GABRA4         |
| NX | GABRA5         |
| NX | GABRA6         |
| NX | GABRB1         |
| NX | GABRB2         |
| NX | GABRB3         |
| NX | GABRD          |
| NX | GABRE          |
| NX | GABRG1         |
| NX | GABRG2         |

|    |         |
|----|---------|
| NX | GABRG3  |
| NX | GABRP   |
| NX | GABRQ   |
| NX | GAD1    |
| NX | GAD2    |
| NX | GAMT    |
| NX | GARS    |
| NX | GATB    |
| NX | GATM    |
| NX | GCAT    |
| NX | GCLC    |
| NX | GCLM    |
| NX | GCSH    |
| NX | GGCX    |
| NX | GIG18   |
| NX | GLDC    |
| NX | GLRA1   |
| NX | GLRA2   |
| NX | GLRA3   |
| NX | GLRB    |
| NX | GLS     |
| NX | GLS2    |
| NX | GLUD1   |
| NX | GLUD2   |
| NX | GLUL    |
| NX | GLYAT   |
| NX | GLYATL1 |
| NX | GLYATL2 |
| NX | GMPS    |
| NX | GNMT    |
| NX | GOT1    |
| NX | GOT2    |
| NX | GPR18   |
| NX | GPT     |
| NX | GPT2    |
| NX | GRIA1   |
| NX | GRIA2   |
| NX | GRIA3   |
| NX | GRIA4   |
| NX | GRID1   |
| NX | GRID2   |
| NX | GRIK1   |
| NX | GRIK2   |
| NX | GRIK3   |
| NX | GRIK4   |
| NX | GRIK5   |
| NX | GRIN1   |
| NX | GRIN2A  |
| NX | GRIN2B  |
| NX | GRIN2C  |
| NX | GRIN2D  |

|    |         |
|----|---------|
| NX | GRIN3A  |
| NX | GRIN3B  |
| NX | GRM1    |
| NX | GRM4    |
| NX | GRM7    |
| NX | GRM8    |
| NX | GSS     |
| NX | GSTM1   |
| NX | GSTP1   |
| NX | HIF1AN  |
| NX | HPGDS   |
| NX | HSD11B1 |
| NX | HSD17B1 |
| NX | IGHG1   |
| NX | IGHG2   |
| NX | ISYNA1  |
| NX | ITPR1   |
| NX | IYD     |
| NX | KYNU    |
| NX | L3HYPDH |
| NX | LARS    |
| NX | LARS2   |
| NX | LCMT1   |
| NX | LCMT2   |
| NX | LGSN    |
| NX | LSS     |
| NX | LYZ     |
| NX | ME2     |
| NX | MGMT    |
| NX | MT-CO1  |
| NX | MT-CO2  |
| NX | MT-CO3  |
| NX | NADSYN1 |
| NX | NAGA    |
| NX | NAGS    |
| NX | NCOA1   |
| NX | NCOA2   |
| NX | NFS1    |
| NX | NME1    |
| NX | NOS1    |
| NX | NOS2    |
| NX | NOS3    |
| NX | NPY     |
| NX | NR0B1   |
| NX | NR1H4   |
| NX | NR1I2   |
| NX | NR1I3   |
| NX | NR3C1   |
| NX | NR3C2   |
| NX | OAT     |
| NX | OAZ1    |



|    |          |
|----|----------|
| NX | OAZ2     |
| NX | OAZ3     |
| NX | OPLAH    |
| NX | OTC      |
| NX | P3H1     |
| NX | P3H2     |
| NX | P3H3     |
| NX | P4HA1    |
| NX | P4HA2    |
| NX | P5CR2    |
| NX | PAEP     |
| NX | PAH      |
| NX | PAICS    |
| NX | PAPSS1   |
| NX | PARS2    |
| NX | PCCB     |
| NX | PFAS     |
| NX | PGR      |
| NX | PHYKPL   |
| NX | PIN1     |
| NX | PIPOX    |
| NX | PKIA     |
| NX | PLA2G1B  |
| NX | PLA2G2E  |
| NX | PPARA    |
| NX | PPAT     |
| NX | PPIA     |
| NX | PPIB     |
| NX | PPIC     |
| NX | PPIF     |
| NX | PPIG     |
| NX | PPIH     |
| NX | PPP1CC   |
| NX | PRKACA   |
| NX | PRLR     |
| NX | PRODH    |
| NX | PROSC    |
| NX | PRSS1    |
| NX | PSAT1    |
| NX | PTPN1    |
| NX | PYCR1    |
| NX | PYCR2    |
| NX | PYCRL    |
| NX | RNASE1   |
| NX | RORA     |
| NX | SARS     |
| NX | SDS      |
| NX | SERPINB3 |
| NX | SHMT1    |
| NX | SHMT2    |
| NX | SIGMAR1  |

|    |          |
|----|----------|
| NX | SLC19A3  |
| NX | SLC1A1   |
| NX | SLC1A2   |
| NX | SLC1A3   |
| NX | SLC1A4   |
| NX | SLC1A6   |
| NX | SLC1A7   |
| NX | SLC25A12 |
| NX | SLC25A13 |
| NX | SLC25A15 |
| NX | SLC25A18 |
| NX | SLC25A2  |
| NX | SLC25A22 |
| NX | SLC32A1  |
| NX | SLC36A1  |
| NX | SLC6A14  |
| NX | SLC6A5   |
| NX | SLC6A7   |
| NX | SLC6A9   |
| NX | SLC7A1   |
| NX | SLC7A11  |
| NX | SLC7A2   |
| NX | SLC7A3   |
| NX | SLC7A4   |
| NX | SLC7A8   |
| NX | SOD2     |
| NX | SPTLC1   |
| NX | SPTLC2   |
| NX | SP_1951  |
| NX | SRC      |
| NX | SRR      |
| NX | SULT2A1  |
| NX | SULT2B1  |
| NX | TARS     |
| NX | TARS2    |
| NX | TAT      |
| NX | TGFBR2   |
| NX | TH       |
| NX | THNSL1   |
| NX | TPI1     |
| NX | TRDMT1   |
| NX | TREM1    |
| NX | VARS     |
| NX | VDR      |
| NX | WARS     |
| NX | WARS2    |
| NX | YARS     |
| NX | YARS2    |
| NX | ACRB     |
| NX | ALDA     |
| NX | ANSB     |

|    |         |
|----|---------|
| NX | ARGB    |
| NX | ARGG    |
| NX | ATPF    |
| NX | ATSA    |
| NX | BFR     |
| NX | BGLA    |
| NX | CAT     |
| NX | CAT3    |
| NX | CBH     |
| NX | CC4     |
| NX | CELCCF  |
| NX | CELCCG  |
| NX | CHOB    |
| NX | CS1     |
| NX | CTAC    |
| NX | CTAD    |
| NX | DAPD    |
| NX | DCTD    |
| NX | DDH     |
| NX | DLGD    |
| NX | ENO     |
| NX | ENV     |
| NX | FDHF    |
| NX | FUCI    |
| NX | FUSA    |
| NX | GAG-POL |
| NX | GLCB    |
| NX | GLPF    |
| NX | GUDD    |
| NX | HISD    |
| NX | ICD     |
| NX | ILVE    |
| NX | KBL     |
| NX | KSI     |
| NX | LEUB    |
| NX | LINB    |
| NX | LPXA    |
| NX | MALE    |
| NX | MENC    |
| NX | METE    |
| NX | MEXA    |
| NX | MRSA    |
| NX | MURA    |
| NX | MURE    |
| NX | MURI    |
| NX | MUTL    |
| NX | MUTY    |
| NX | NCSA    |
| NX | NIKA    |
| NX | NPRS    |
| NX | NRDB    |

|    |         |
|----|---------|
| NX | OPPA    |
| NX | PCP     |
| NX | PFLB    |
| NX | PHNA    |
| NX | POL     |
| NX | PPCA    |
| NX | PURF    |
| NX | RHAA    |
| NX | RMLC    |
| NX | SERA    |
| NX | SHP     |
| NX | SUFS    |
| NX | TRPS    |
| NX | TRPS2   |
| NX | TYRS    |
| NX | XYLA    |
| SM | AKR1C1  |
| SM | AKR1C2  |
| SM | AR      |
| SM | ATP1A1  |
| SM | CTRB1   |
| SM | ESR1    |
| SM | ESR2    |
| SM | GABRA1  |
| SM | GABRA2  |
| SM | GABRA3  |
| SM | GABRA4  |
| SM | GABRA5  |
| SM | GABRA6  |
| SM | GABRB1  |
| SM | GABRB2  |
| SM | GABRB3  |
| SM | GABRD   |
| SM | GABRE   |
| SM | GABRG1  |
| SM | GABRG2  |
| SM | GABRG3  |
| SM | GABRP   |
| SM | GABRQ   |
| SM | GAPDHS  |
| SM | GLRA3   |
| SM | GRIN1   |
| SM | GRIN2A  |
| SM | GRIN2B  |
| SM | GRIN2C  |
| SM | GRIN2D  |
| SM | GRIN3A  |
| SM | GRIN3B  |
| SM | HSD17B1 |
| SM | LCN2    |
| SM | LIP3    |

|    |         |
|----|---------|
| SM | LSS     |
| SM | MIF     |
| SM | NCOA2   |
| SM | NR1I2   |
| SM | NR1I3   |
| SM | NR3C1   |
| SM | PGR     |
| SM | PPARA   |
| SM | PPP1CC  |
| SM | RORA    |
| SM | SIGMAR1 |
| SM | SULT2A1 |
| SM | SULT2B1 |
| SM | VDR     |
| SM | YWHAE   |
| SM | ASST    |
| SM | CHOB    |
| SM | DHBE    |
| SM | HUTH    |
| SM | KSI     |
| SM | MNDD    |
| SM | NAHD    |
| SM | PAC     |
| SM | PCAG    |
| SM | PCAH    |
| SM | PYP     |
| SM | UBIC    |
| SM | XYNY    |
| SM | XYNZ    |
| TR | 9       |
| TR | ABL1    |
| TR | ABO     |
| TR | ACSL3   |
| TR | ACSL4   |
| TR | ACTA1   |
| TR | ADH1B   |
| TR | AKR1C1  |
| TR | AKR1C2  |
| TR | AMY1A   |
| TR | AMY2A   |
| TR | AMY2B   |
| TR | AR      |
| TR | ARF1    |
| TR | ARF6    |
| TR | ATOX1   |
| TR | ATP1A1  |
| TR | CALM1   |
| TR | CDA     |
| TR | CYP27B1 |
| TR | CYP2B6  |
| TR | CYP2C8  |

|    |         |
|----|---------|
| TR | DAO     |
| TR | ECI2    |
| TR | ELOVL4  |
| TR | ESR1    |
| TR | ESR2    |
| TR | FADS1   |
| TR | FADS2   |
| TR | FFAR1   |
| TR | FHIT    |
| TR | FKBP1A  |
| TR | FURIN   |
| TR | GABRA1  |
| TR | GABRA2  |
| TR | GABRA3  |
| TR | GABRA4  |
| TR | GABRA5  |
| TR | GABRA6  |
| TR | GABRB1  |
| TR | GABRB2  |
| TR | GABRB3  |
| TR | GABRD   |
| TR | GABRE   |
| TR | GABRG1  |
| TR | GABRG2  |
| TR | GABRG3  |
| TR | GABRP   |
| TR | GABRQ   |
| TR | GCK     |
| TR | GLRA3   |
| TR | GLT6D1  |
| TR | GLTP    |
| TR | GM2A    |
| TR | GNPDA1  |
| TR | GRIN1   |
| TR | GRIN2A  |
| TR | GRIN2B  |
| TR | GRIN2C  |
| TR | GRIN2D  |
| TR | GRIN3A  |
| TR | GRIN3B  |
| TR | GSTM1   |
| TR | GSTP1   |
| TR | GUCA1A  |
| TR | HK1     |
| TR | HNF4A   |
| TR | HNF4G   |
| TR | HPGDS   |
| TR | HSD17B1 |
| TR | IFNB1   |
| TR | IGHG2   |
| TR | IGKC    |

|    |          |
|----|----------|
| TR | INS      |
| TR | ISYNA1   |
| TR | ITPR1    |
| TR | KRTAP5-2 |
| TR | KRTAP5-3 |
| TR | LALBA    |
| TR | LCT      |
| TR | LCTL     |
| TR | LGALS2   |
| TR | LGALS7   |
| TR | LIP3     |
| TR | LSS      |
| TR | LY96     |
| TR | LYZ      |
| TR | MB       |
| TR | MBL2     |
| TR | MT1417   |
| TR | NAGA     |
| TR | NCAN     |
| TR | NCOA1    |
| TR | NCOA2    |
| TR | NR1I2    |
| TR | NR1I3    |
| TR | NR3C1    |
| TR | NUDT9    |
| TR | PAEP     |
| TR | PAPSS1   |
| TR | PGR      |
| TR | PKIA     |
| TR | PLA2G1B  |
| TR | PLA2G2A  |
| TR | PLA2G2D  |
| TR | PLA2G2E  |
| TR | PMP2     |
| TR | PPARA    |
| TR | PPARD    |
| TR | PPARG    |
| TR | PPP1CC   |
| TR | PPP3CA   |
| TR | PPP3R1   |
| TR | PPT1     |
| TR | PRKACA   |
| TR | PTGS1    |
| TR | PTGS2    |
| TR | PVR      |
| TR | PYGL     |
| TR | PYGM     |
| TR | RCVRN    |
| TR | RHO      |
| TR | RORA     |
| TR | RTCB     |

|    |             |
|----|-------------|
| TR | RV0233      |
| TR | S100B       |
| TR | SEC14L2     |
| TR | SFTPD       |
| TR | SIGLEC1     |
| TR | SIGMAR1     |
| TR | SLC8A1      |
| TR | SMARCA5     |
| TR | SULT2A1     |
| TR | SULT2B1     |
| TR | TGFBR2      |
| TR | TLR4        |
| TR | TPI1        |
| TR | TRAPPC3     |
| TR | TRDMT1      |
| TR | TRPV1       |
| TR | VDR         |
| TR | WARS        |
| TR | WARS2       |
| TR | YWHAE       |
| TR | ABFA        |
| TR | AGLA        |
| TR | ALGD        |
| TR | ALSB        |
| TR | AMPC        |
| TR | AMS         |
| TR | AMY         |
| TR | AMYA        |
| TR | AMYE        |
| TR | AMYM        |
| TR | AMYP        |
| TR | ARAC        |
| TR | ARAF        |
| TR | ARGG        |
| TR | AROQ        |
| TR | ASPA        |
| TR | BFR         |
| TR | BGL3        |
| TR | BGLA        |
| TR | BLA         |
| TR | BLACTX-M-14 |
| TR | BLACTX-M-27 |
| TR | BLACTX-M-9A |
| TR | BOTB        |
| TR | BUDC        |
| TR | CBHA        |
| TR | CC4         |
| TR | CEL5A       |
| TR | CELA        |
| TR | CELA1       |
| TR | CELB        |



|    |          |
|----|----------|
| TR | CELC307  |
| TR | CELCCF   |
| TR | CELCCG   |
| TR | CELD     |
| TR | CELS     |
| TR | CENC     |
| TR | CEX      |
| TR | CFT      |
| TR | CGT      |
| TR | CHOB     |
| TR | CSLB     |
| TR | CTXB     |
| TR | CUMD     |
| TR | CYP102A1 |
| TR | CYPC     |
| TR | DCTD     |
| TR | DMSA     |
| TR | EBGA     |
| TR | ECO      |
| TR | ENGF     |
| TR | ENO      |
| TR | ENTB     |
| TR | FABB     |
| TR | FABI     |
| TR | FADR     |
| TR | FHUA     |
| TR | FUCI     |
| TR | GAG      |
| TR | GAG-POL  |
| TR | GALM     |
| TR | GANB     |
| TR | GDHB     |
| TR | GFO      |
| TR | GLCB     |
| TR | GLK      |
| TR | GLPF     |
| TR | HISD     |
| TR | HMUO     |
| TR | KCSA     |
| TR | KSI      |
| TR | LACZ     |
| TR | LAMB     |
| TR | LECB     |
| TR | LGTC     |
| TR | LIPB     |
| TR | LPXC     |
| TR | LUXF     |
| TR | MAF      |
| TR | MALE     |
| TR | MALP     |
| TR | METE     |

|    |        |
|----|--------|
| TR | MEXA   |
| TR | MGLB   |
| TR | MOXC   |
| TR | MUTL   |
| TR | MUTY   |
| TR | NEDA   |
| TR | NEF    |
| TR | NOS    |
| TR | NPLT   |
| TR | NRDB   |
| TR | PAB    |
| TR | PFLB   |
| TR | PPGMK  |
| TR | RBSK   |
| TR | RHAA   |
| TR | SACB   |
| TR | SCRY   |
| TR | SPOII  |
| TR | STX2EB |
| TR | STXB   |
| TR | TCP14  |
| TR | TESA   |
| TR | TETX   |
| TR | TONB   |
| TR | TREZ   |
| TR | TRPS   |
| TR | TRPS2  |
| TR | TVAI   |
| TR | TVAII  |
| TR | XLNA   |
| TR | XYLA   |
| TR | XYNA   |
| WY | ABL1   |
| WY | ACHE   |
| WY | ACSL3  |
| WY | ACSL4  |
| WY | ADRA2A |
| WY | ADRA2B |
| WY | ADRA2C |
| WY | AKR1D1 |
| WY | AR     |
| WY | ARF1   |
| WY | ARF6   |
| WY | CALM1  |
| WY | CALY   |
| WY | CHRNA2 |
| WY | CYP2C8 |
| WY | DRD1   |
| WY | DRD2   |
| WY | DRD3   |
| WY | DRD4   |

|    |          |
|----|----------|
| WY | DRD5     |
| WY | ECI2     |
| WY | ELOVL4   |
| WY | ESR2     |
| WY | FADS1    |
| WY | FADS2    |
| WY | FFAR1    |
| WY | FKBP1A   |
| WY | FURIN    |
| WY | GABRA1   |
| WY | GABRA2   |
| WY | GABRA3   |
| WY | GABRA4   |
| WY | GABRA5   |
| WY | GABRA6   |
| WY | GLTP     |
| WY | GM2A     |
| WY | GUCA1A   |
| WY | HNF4A    |
| WY | HNF4G    |
| WY | HSD17B1  |
| WY | HSD17B11 |
| WY | HTR1A    |
| WY | HTR1B    |
| WY | HTR1D    |
| WY | HTR2A    |
| WY | HTR2B    |
| WY | HTR2C    |
| WY | HTR3A    |
| WY | IGHG2    |
| WY | INS      |
| WY | LALBA    |
| WY | LIP3     |
| WY | LSS      |
| WY | LY96     |
| WY | MT1417   |
| WY | NCOA1    |
| WY | NCOA2    |
| WY | NR1I3    |
| WY | OPRK1    |
| WY | PAEP     |
| WY | PKIA     |
| WY | PLA2G1B  |
| WY | PLA2G2A  |
| WY | PLA2G2D  |
| WY | PLA2G2E  |
| WY | PMP2     |
| WY | PPARD    |
| WY | PPARG    |
| WY | PPP3CA   |
| WY | PPP3R1   |

|    |          |
|----|----------|
| WY | PPT1     |
| WY | PRKACA   |
| WY | PTGS1    |
| WY | PTGS2    |
| WY | PVR      |
| WY | RCVRN    |
| WY | RHO      |
| WY | RXRA     |
| WY | RV0233   |
| WY | SEC14L2  |
| WY | SLC8A1   |
| WY | SULT2A1  |
| WY | TLR4     |
| WY | TRAPPC3  |
| WY | TRPA1    |
| WY | TRPM8    |
| WY | TRPV1    |
| WY | TRPV3    |
| WY | VDR      |
| WY | CAMC     |
| WY | CYP102A1 |
| WY | CYPC     |
| WY | FABB     |
| WY | FABG3    |
| WY | FADR     |
| WY | FHUA     |
| WY | GAG      |
| WY | GAG-POL  |
| WY | LIPB     |
| WY | LPXC     |
| WY | LUXF     |
| WY | NEF      |
| WY | PAB      |
| WY | TCP14    |
| WY | TESA     |
| WY | TONB     |
| XF | ADH1B    |
| XF | AKR1C1   |
| XF | AKR1C2   |
| XF | AKR1C3   |
| XF | AKR1D1   |
| XF | AR       |
| XF | ARF1     |
| XF | CDA      |
| XF | CYP17A1  |
| XF | CYP19A1  |
| XF | CYP27B1  |
| XF | ESR1     |
| XF | ESR2     |
| XF | GABRA1   |
| XF | GABRA2   |

|    |          |
|----|----------|
| XF | GABRA3   |
| XF | GABRA4   |
| XF | GABRA5   |
| XF | GABRA6   |
| XF | GABRB1   |
| XF | GABRB2   |
| XF | GABRB3   |
| XF | GABRD    |
| XF | GABRE    |
| XF | GABRG1   |
| XF | GABRG2   |
| XF | GABRG3   |
| XF | GABRP    |
| XF | GABRQ    |
| XF | GRIN1    |
| XF | GRIN2A   |
| XF | GRIN2B   |
| XF | GRIN2C   |
| XF | GRIN2D   |
| XF | GRIN3A   |
| XF | GRIN3B   |
| XF | GSTP1    |
| XF | HPGDS    |
| XF | HSD17B1  |
| XF | HSD17B11 |
| XF | HSD3B1   |
| XF | IGHG2    |
| XF | ISYNA1   |
| XF | ITPR1    |
| XF | LCN9     |
| XF | LIP3     |
| XF | LSS      |
| XF | MED1     |
| XF | NAGA     |
| XF | NCOA1    |
| XF | NCOA2    |
| XF | NR1I2    |
| XF | NR1I3    |
| XF | NR3C1    |
| XF | NR3C2    |
| XF | OPRK1    |
| XF | PAEP     |
| XF | PAPSS1   |
| XF | PGR      |
| XF | PLA2G2E  |
| XF | PPARA    |
| XF | RORA     |
| XF | SIGMAR1  |
| XF | SULT2A1  |
| XF | SULT2B1  |
| XF | TGFBR2   |

|     |        |
|-----|--------|
| XF  | TRDMT1 |
| XF  | VDR    |
| XF  | ARGG   |
| XF  | BFR    |
| XF  | BGLA   |
| XF  | CAMC   |
| XF  | CC4    |
| XF  | CELCCF |
| XF  | CELCCG |
| XF  | CHOB   |
| XF  | DCTD   |
| XF  | DHAK   |
| XF  | ENO    |
| XF  | ERYF   |
| XF  | FABG3  |
| XF  | FUCI   |
| XF  | GLCB   |
| XF  | GLPF   |
| XF  | HISD   |
| XF  | KSI    |
| XF  | MALE   |
| XF  | METE   |
| XF  | MEXA   |
| XF  | MUTL   |
| XF  | MUTY   |
| XF  | NRDB   |
| XF  | ONR    |
| XF  | PFLB   |
| XF  | RHAA   |
| XF  | XYLA   |
| YHS | ACHE   |
| YHS | ADRA2A |
| YHS | ADRA2B |
| YHS | ADRA2C |
| YHS | AKR1C1 |
| YHS | AKR1C2 |
| YHS | AR     |
| YHS | CALY   |
| YHS | CHRM2  |
| YHS | CHRNA2 |
| YHS | CHRNA3 |
| YHS | CHRNA4 |
| YHS | CHRNA7 |
| YHS | CHRNB2 |
| YHS | CHRNB4 |
| YHS | CYBA   |
| YHS | CYBB   |
| YHS | DRD1   |
| YHS | DRD2   |
| YHS | DRD3   |
| YHS | DRD4   |

|     |         |
|-----|---------|
| YHS | DRD5    |
| YHS | ESR1    |
| YHS | ESR2    |
| YHS | GABRA1  |
| YHS | GABRA2  |
| YHS | GABRA3  |
| YHS | GABRA4  |
| YHS | GABRA5  |
| YHS | GABRA6  |
| YHS | GABRB1  |
| YHS | GABRB2  |
| YHS | GABRB3  |
| YHS | GABRD   |
| YHS | GABRE   |
| YHS | GABRG1  |
| YHS | GABRG2  |
| YHS | GABRG3  |
| YHS | GABRP   |
| YHS | GABRQ   |
| YHS | GRIN1   |
| YHS | GRIN2A  |
| YHS | GRIN2B  |
| YHS | GRIN2C  |
| YHS | GRIN2D  |
| YHS | GRIN3A  |
| YHS | GRIN3B  |
| YHS | HSD17B1 |
| YHS | HTR1A   |
| YHS | HTR1B   |
| YHS | HTR1D   |
| YHS | HTR2A   |
| YHS | HTR2B   |
| YHS | HTR2C   |
| YHS | HTR3A   |
| YHS | LIP3    |
| YHS | LSS     |
| YHS | NCF1    |
| YHS | NCF2    |
| YHS | NCF4    |
| YHS | NCOA2   |
| YHS | NR1I2   |
| YHS | NR1I3   |
| YHS | NR3C1   |
| YHS | OPRD1   |
| YHS | OPRK1   |
| YHS | OPRM1   |
| YHS | PGR     |
| YHS | PGRMC1  |
| YHS | PPARA   |
| YHS | RAC1    |
| YHS | RAC2    |

|     |         |
|-----|---------|
| YHS | RORA    |
| YHS | SIGMAR1 |
| YHS | SLC18A2 |
| YHS | SLC6A2  |
| YHS | SLC6A4  |
| YHS | SULT2A1 |
| YHS | SULT2B1 |
| YHS | TOP1    |
| YHS | VDR     |
| YHS | CHOB    |
| YHS | KSI     |
| YHS | QACR    |
| ZQ  | 72      |
| ZQ  | 9       |
| ZQ  | ABCA1   |
| ZQ  | ABCB11  |
| ZQ  | ABCC8   |
| ZQ  | ABCC9   |
| ZQ  | ABO     |
| ZQ  | ACHE    |
| ZQ  | ACOT13  |
| ZQ  | ADRA1A  |
| ZQ  | ADRA1B  |
| ZQ  | ADRA1D  |
| ZQ  | ADRA2A  |
| ZQ  | ADRA2B  |
| ZQ  | ADRA2C  |
| ZQ  | ADRB1   |
| ZQ  | ADRB2   |
| ZQ  | ADRB3   |
| ZQ  | AKR1C3  |
| ZQ  | ALDH2   |
| ZQ  | AMY1A   |
| ZQ  | AMY2A   |
| ZQ  | AMY2B   |
| ZQ  | ATF1    |
| ZQ  | ATF2    |
| ZQ  | ATF3    |
| ZQ  | ATF4    |
| ZQ  | ATF5    |
| ZQ  | ATF6    |
| ZQ  | ATF7    |
| ZQ  | ATP1A1  |
| ZQ  | ATP5A1  |
| ZQ  | ATP5B   |
| ZQ  | ATP5C1  |
| ZQ  | CA1     |
| ZQ  | CA12    |
| ZQ  | CA14    |
| ZQ  | CA2     |
| ZQ  | CA3     |



|    |          |
|----|----------|
| ZQ | CA4      |
| ZQ | CA5A     |
| ZQ | CA5B     |
| ZQ | CA6      |
| ZQ | CA7      |
| ZQ | CA9      |
| ZQ | CDK6     |
| ZQ | CFTR     |
| ZQ | COMT     |
| ZQ | CPT1A    |
| ZQ | CSNK2A1  |
| ZQ | CYP2A6   |
| ZQ | CYP2B6   |
| ZQ | DBI      |
| ZQ | DRD1     |
| ZQ | ESR1     |
| ZQ | ESR2     |
| ZQ | FOS      |
| ZQ | GCK      |
| ZQ | GLT6D1   |
| ZQ | GLTP     |
| ZQ | GNPDA1   |
| ZQ | HCK      |
| ZQ | HIBCH    |
| ZQ | HK1      |
| ZQ | IFNB1    |
| ZQ | IGHG1    |
| ZQ | IL2      |
| ZQ | JDP2     |
| ZQ | JUN      |
| ZQ | KCNJ1    |
| ZQ | KCNJ11   |
| ZQ | KCNJ5    |
| ZQ | KCNJ8    |
| ZQ | KRTAP5-2 |
| ZQ | KRTAP5-3 |
| ZQ | LCT      |
| ZQ | LCTL     |
| ZQ | LGALS2   |
| ZQ | LGALS7   |
| ZQ | MAOB     |
| ZQ | MB       |
| ZQ | MBL2     |
| ZQ | MTTP     |
| ZQ | NCAN     |
| ZQ | NCOA1    |
| ZQ | NCOA2    |
| ZQ | NFATC1   |
| ZQ | NR3C1    |
| ZQ | NUDT9    |
| ZQ | P2RY12   |

|    |         |
|----|---------|
| ZQ | PAH     |
| ZQ | PIK3CA  |
| ZQ | PIK3CG  |
| ZQ | PIK3R1  |
| ZQ | PIM1    |
| ZQ | PLK1    |
| ZQ | PRKACA  |
| ZQ | PRKCA   |
| ZQ | PRKCB   |
| ZQ | PTGIR   |
| ZQ | PTGIS   |
| ZQ | PTGS1   |
| ZQ | PTK2B   |
| ZQ | PYGL    |
| ZQ | PYGM    |
| ZQ | RHO     |
| ZQ | SFTPD   |
| ZQ | SIGLEC1 |
| ZQ | SLC18A1 |
| ZQ | SLC18A2 |
| ZQ | SLC6A2  |
| ZQ | SLC6A3  |
| ZQ | SLC6A4  |
| ZQ | SMARCA5 |
| ZQ | SOAT1   |
| ZQ | SOAT2   |
| ZQ | SQLE    |
| ZQ | STK17B  |
| ZQ | SYK     |
| ZQ | TNF     |
| ZQ | TOP2A   |
| ZQ | TOP2B   |
| ZQ | UGT3A1  |
| ZQ | AGLA    |
| ZQ | ALSB    |
| ZQ | AMS     |
| ZQ | AMY     |
| ZQ | AMYA    |
| ZQ | AMYE    |
| ZQ | AMYM    |
| ZQ | AMYP    |
| ZQ | ASPA    |
| ZQ | ASST    |
| ZQ | BLA     |
| ZQ | BOTB    |
| ZQ | BUDC    |
| ZQ | CBHA    |
| ZQ | CCRA    |
| ZQ | CEL5A   |
| ZQ | CELA    |
| ZQ | CELA1   |

|    |         |
|----|---------|
| ZQ | CELB    |
| ZQ | CELC307 |
| ZQ | CELCCF  |
| ZQ | CELCCG  |
| ZQ | CELD    |
| ZQ | CELS    |
| ZQ | CENC    |
| ZQ | CEX     |
| ZQ | CGT     |
| ZQ | CSLB    |
| ZQ | CTXB    |
| ZQ | DMSA    |
| ZQ | ECO     |
| ZQ | ENGF    |
| ZQ | ENTB    |
| ZQ | FABI    |
| ZQ | FABZ    |
| ZQ | FHUA    |
| ZQ | GALM    |
| ZQ | GANB    |
| ZQ | GDHB    |
| ZQ | GFO     |
| ZQ | GLK     |
| ZQ | LACZ    |
| ZQ | LAMB    |
| ZQ | LECB    |
| ZQ | LGTC    |
| ZQ | MALE    |
| ZQ | MALP    |
| ZQ | MGLB    |
| ZQ | MOXC    |
| ZQ | MUTY    |
| ZQ | NEDA    |
| ZQ | NPLT    |
| ZQ | PKN3    |
| ZQ | PPGMK   |
| ZQ | SPOII   |
| ZQ | STX2EB  |
| ZQ | STXB    |
| ZQ | TETX    |
| ZQ | TREZ    |
| ZQ | TTGR    |
| ZQ | TVAI    |
| ZQ | TVAII   |
| ZQ | XLNA    |
| ZQ | XYLA    |
| ZQ | XYNA    |

**Table S3 Detailed information of drug target-disease gene network**

| <b>Node1</b> | <b>Node2</b> |
|--------------|--------------|
| EPRS         | KARS         |
| JUN          | FOS          |
| NCOA2        | ESR1         |
| SUCLG1       | SUCLA2       |
| PTPN1        | SRC          |
| TLR4         | LY96         |
| PRKAA1       | PRKAG1       |
| NFKB1        | NFKBIA       |
| MT-CO2       | COX5A        |
| JUN          | ATF3         |
| SRC          | RAC1         |
| LARS         | DARS         |
| ABCC8        | KCNJ11       |
| ACTA1        | UBC          |
| GLDC         | GCSH         |
| ATP5A1       | ATP5B        |
| EPRS         | DARS         |
| MED1         | POLR2E       |
| MED1         | ESR1         |
| SDHD         | SDHC         |
| UBC          | NFKBIA       |
| NCF2         | CYBA         |
| GRIN1        | GRIN2A       |
| MED1         | PPARG        |
| AR           | UBC          |
| NCOA2        | AR           |
| UBC          | HMGCR        |
| IKBKB        | NFKB1        |
| PRKAG2       | PRKAB1       |
| CTNNB1       | RUVBL1       |
| MT-CO2       | COX7C        |
| SDHB         | SDHA         |
| MT-CO2       | COX4I1       |
| ASL          | ASS1         |
| COX5A        | COX4I1       |
| JDP2         | ATF2         |
| PRKAG1       | PRKAB1       |
| NFKB2        | UBC          |
| SRC          | PGR          |
| F10          | SERPINC1     |
| MT-CO2       | COX6B1       |
| NCF4         | NCF2         |
| NCOA1        | RARA         |
| PPP3CA       | PPP3R1       |
| NCOA1        | ESR1         |
| SERPINC1     | F9           |
| SRC          | PIK3R1       |
| CAD          | DHODH        |
| GCLM         | GCLC         |
| PIK3R1       | PIK3CA       |
| AR           | CTNNB1       |
| NCF2         | RAC1         |
| PRKAA1       | PRKAB1       |
| NCF1         | CYBA         |
| SUCLG2       | SUCLG1       |
| JUN          | CSNK2A1      |
| UBC          | CTNNB1       |
| ATP5C1       | ATP5A1       |
| HDAC2        | TP53         |
| BCL2         | TP53         |
| ATP5C1       | ATP5B        |
| CYTH2        | ARF1         |
| IARS         | DARS         |
| UBC          | HSPA5        |
| SRC          | ESR1         |
| IKBKB        | UBC          |
| ATF3         | ATF4         |
| CYTH2        | ARF6         |
| MT-CO3       | MT-CO2       |
| HDAC2        | SMARCA5      |
| IARS         | EPRS         |

|          |         |
|----------|---------|
| LARS     | KARS    |
| UBC      | ESR1    |
| MT-CO2   | COX5B   |
| AR       | SRC     |
| NCOA1    | PPARG   |
| HBB      | HBA1    |
| MT-CO2   | COX6C   |
| GRIN1    | GRIN2B  |
| NR0B1    | NR5A1   |
| UBC      | ALDOA   |
| COX5A    | COX5B   |
| VDR      | MED1    |
| PAICS    | PFAS    |
| SERPINC1 | F2      |
| TP53     | PIN1    |
| IARS     | KARS    |
| VDR      | NCOA1   |
| NCF2     | RAC2    |
| FARSA    | FARSB   |
| IKBKB    | NFKBIA  |
| RAC1     | UBC     |
| SDHD     | SDHB    |
| PRKAA1   | PRKAG2  |
| MT-CO3   | MT-CO1  |
| MT-CO2   | MT-CO1  |
| UBC      | CFTR    |
| PPP2CA   | UBC     |
| NCOA1    | NR3C1   |
| UBC      | TP53    |
| JUN      | JDP2    |
| SDHC     | SDHA    |
| PRKAA2   | PRKAG1  |
| PRKAA2   | PRKAB1  |
| RABGGTB  | RABGGTA |
| ESR2     | NCOA1   |
| LARS     | EPRS    |
| JUN      | ATF2    |
| SDHB     | SDHC    |
| B2M      | HLA-B   |
| NCF2     | NCF1    |
| JUN      | UBC     |
| AR       | NCOA1   |
| LARS     | IARS    |
| ESR2     | ESR1    |
| VDR      | NCOA2   |
| PAICS    | PPAT    |
| MT-CO1   | COX4I1  |
| KARS     | DARS    |
| ATF3     | TP53    |
| HDAC2    | CSNK2A1 |
| THBD     | F2      |
| SDHD     | SDHA    |
| NR0B1    | AR      |
| ARF1     | PLD2    |
| GNAS     | PTGIR   |
| SUCLA2   | OGDH    |
| NCOA2    | NCOA1   |
| GNAS     | UBC     |
| UBC      | PLK1    |
| GARS     | IARS    |
| COX5A    | COX6B1  |
| COX5A    | COX7C   |
| MT-CO1   | COX5A   |
| NCOA2    | NR3C1   |
| GARS     | AARS    |
| LARS     | LARS2   |
| GPI      | UBC     |
| TOP2A    | TOP1    |
| COX5B    | COX7C   |
| NCOA2    | PPARG   |
| YARS     | EPRS    |
| SUCLG2   | OGDH    |
| LARS     | AARS    |
| JUN      | ESR1    |
| NCOA1    | PPARA   |

|          |         |
|----------|---------|
| ABL1     | CTNNB1  |
| NCOA2    | ESR2    |
| ALDH5A1  | ABAT    |
| ALDH18A1 | PYCR1   |
| SRC      | PTK2B   |
| ASS1     | OTC     |
| TOP2A    | TOP2B   |
| UBC      | ADRB2   |
| PPIA     | UBC     |
| COX7C    | COX6B1  |
| UBC      | PPP2CB  |
| MT-CO3   | COX5A   |
| YARS     | UBC     |
| JUN      | NR3C1   |
| NCF4     | CYBA    |
| PTGS2    | TP53    |
| ATF3     | ATF2    |
| EPRS     | UBC     |
| CTNNB1   | PIK3R1  |
| IKKBK    | NFKB2   |
| COX5B    | COX4I1  |
| NOS3     | ESR1    |
| TOP2B    | TOP1    |
| TP53     | CSNK2A1 |
| UBC      | ATP5A1  |
| NCOA2    | RARA    |
| JUN      | TP53    |
| SPTLC1   | SPTLC2  |
| ATP5C1   | ATP5E   |
| RHO      | RCVRN   |
| CTH      | CBS     |
| COX5B    | COX6B1  |
| PPIB     | LEPRE1  |
| ATF6     | HSPA5   |
| PPIA     | PPP3CA  |
| MED1     | RARA    |
| ATP5A1   | ATP5E   |
| SRC      | ESR2    |
| PRKAG3   | PRKAB1  |
| UBC      | NR3C1   |
| COX6C    | COX5B   |
| NAGS     | ASS1    |
| RXRG     | RARA    |
| ATP5B    | ATP5E   |
| MED1     | PPARA   |
| ABCC8    | KCNJ8   |
| GLDC     | SHMT1   |
| PPIA     | PPP3R1  |
| SRC      | CTNNB1  |
| CTNNB1   | HNF4A   |
| GPI      | PGM1    |
| UBC      | YWHAE   |
| JUN      | ATF4    |
| PSAT1    | PHGDH   |
| FOS      | TP53    |
| OXCT2    | OXCT1   |
| CAD      | ASS1    |
| GMPS     | APRT    |
| NR3C1    | NFKB1   |
| PFAS     | PPAT    |
| CACNB3   | CACNA1C |
| TP53     | MLH1    |
| SRC      | UBC     |
| PPP2CA   | LCMT1   |
| GLDC     | SHMT2   |
| RAC1     | ARF6    |
| UBC      | NFKB1   |
| ABCA1    | PPARA   |
| SHMT1    | TYMS    |
| UBC      | ACTG2   |
| HNF4A    | HNF1A   |
| VDR      | SRC     |
| RPS6KA3  | PDPK1   |
| COX6A2   | COX5B   |
| YARS     | FARS2   |

|          |          |
|----------|----------|
| UBC      | NOS2     |
| IARS     | AARS     |
| SRC      | GRIN2A   |
| RAC1     | PLD1     |
| TOP2A    | UBC      |
| SYK      | UBC      |
| MT-CO1   | COX5B    |
| PRKCA    | RAC1     |
| RAC1     | NFKB1    |
| UBC      | NOS1     |
| UBC      | UNG      |
| PTPN1    | INS      |
| SRC      | NFKBIA   |
| RAC1     | NME1     |
| PRKAA2   | ACACB    |
| OAZ1     | ODC1     |
| PHGDH    | UBC      |
| P5CR2    | ALDH18A1 |
| UBC      | PPARG    |
| CTNNB1   | HNF1A    |
| ABL1     | SRC      |
| PRKAG1   | PRKAG2   |
| PIK3R1   | ESR1     |
| CALM1    | NOS3     |
| HNF4A    | NR0B2    |
| OAT      | OTC      |
| JUN      | NOS3     |
| HDAC2    | UBC      |
| ABL1     | JUN      |
| ALDH18A1 | PYCRL    |
| GARS     | EPRS     |
| CAD      | PPAT     |
| CPT1A    | PPARA    |
| ESRRG    | NR0B2    |
| SLC3A1   | SLC7A9   |
| PPARG    | ESR1     |
| JUN      | IL2      |
| DPYD     | CAD      |
| FOS      | IL2      |
| ESR2     | MED1     |
| COX5A    | COX6C    |
| UBC      | GLUL     |
| UBC      | SQLE     |
| ATF4     | ASNS     |
| SUCLA2   | SDHA     |
| MAF      | FOS      |
| GMPS     | CAD      |
| CACNB1   | CACNA1D  |
| PRKAA1   | PRKAG3   |
| JUN      | CTNNB1   |
| IKBKB    | PRKCB    |
| COX6C    | COX6B1   |
| NFKB2    | NFKB1    |
| AR       | CDK6     |
| FXN      | NFS1     |
| RAC1     | CYBA     |
| MT-CO3   | COX6B1   |
| FOS      | ATF2     |
| RAC1     | CTNNB1   |
| ATF6     | ATF4     |
| PRKCA    | RARA     |
| PRKCA    | NCF1     |
| COX4I1   | COX6B1   |
| ALDH18A1 | OAT      |
| TLR2     | NFKB1    |
| FOS      | ESR1     |
| PGM1     | PYGL     |
| HSD3B1   | HSD17B6  |
| SRC      | F2       |
| PIM1     | NFATC1   |
| GNAS     | ADCY2    |
| SUCLG2   | SDHA     |
| PIK3CA   | ESR1     |
| GMPS     | PFAS     |
| COX4I1   | COX7C    |

|          |         |
|----------|---------|
| GCLC     | GSS     |
| PSAT1    | UBC     |
| UBC      | ACSL4   |
| UBC      | ATP1A1  |
| S100B    | TP53    |
| PGR      | NCOA1   |
| GMPS     | PRKAG2  |
| CYP17A1  | HSD3B1  |
| NCF4     | NCF1    |
| JUN      | PTGS2   |
| INS      | GCK     |
| PRKCA    | PLD1    |
| FARSB    | AARS    |
| PLK1     | TP53    |
| MT-CO3   | COX4I1  |
| UBC      | CHMP4B  |
| MT-CO1   | COX7C   |
| LSS      | UBC     |
| HDAC2    | NFKB1   |
| PARS2    | EPRS    |
| IARS     | UBC     |
| SERPINC1 | PROC    |
| SUCLG1   | SDHA    |
| GARS     | ASNS    |
| ESR2     | NOS3    |
| AR       | TP53    |
| FARSB    | FARS2   |
| MTR      | MTRR    |
| MT-CO3   | COX5B   |
| CSNK2A1  | NFKBIA  |
| PTK2B    | GRIN2A  |
| TH       | DDC     |
| ADSS     | CAD     |
| F7       | GGCX    |
| PRKAA2   | PRKAG2  |
| AGXT     | AGXT2   |
| ACACB    | CAD     |
| ATF4     | FOS     |
| ABCC9    | KCNJ8   |
| JUN      | BCL2    |
| UBC      | TARS    |
| IARS     | FARSB   |
| UBC      | SPTLC1  |
| ABL1     | TP53    |
| PLA2G2A  | PTGS2   |
| UBC      | RARA    |
| UBC      | ANXA1   |
| PFAS     | CAD     |
| ATF2     | INS     |
| PPP1CC   | PLK1    |
| MT-CO1   | COX6B1  |
| CACNB2   | CACNA1C |
| NR5A1    | NR0B2   |
| CACNA2D1 | CACNA1D |
| ARF6     | NME1    |
| COX6C    | COX4I1  |
| NFATC1   | IL2     |
| PLD2     | RAC2    |
| GAD1     | ABAT    |
| ATF4     | HSPA5   |
| JUN      | RAC1    |
| YARS     | YARS2   |
| FADS1    | PPARA   |
| OAT      | ARG2    |
| SRC      | PIK3CA  |
| SYK      | SRC     |
| CTPS1    | UBC     |
| CACNB2   | CACNA1D |
| OAZ3     | ODC1    |
| UBC      | NME1    |
| ABL1     | PIK3R1  |
| LSS      | SQLE    |
| NR0B2    | ESR1    |
| BGLAP    | ATF4    |
| CTNNB1   | NFKB1   |



|         |          |
|---------|----------|
| HSD17B6 | CYP19A1  |
| SRC     | RARA     |
| GCLM    | GSS      |
| ALAD    | ALAS1    |
| GGCX    | F9       |
| RUVBL1  | SMARCA5  |
| JUN     | ATF1     |
| HSD3B1  | CYP19A1  |
| AR      | JUN      |
| ADSSL1  | CAD      |
| GLUL    | GLUD1    |
| COX6C   | COX7C    |
| NAGS    | OTC      |
| HNF4A   | MED1     |
| ABAT    | GAD2     |
| FKBP1A  | PPP3R1   |
| NR1H4   | MED1     |
| MT-CO3  | COX7C    |
| BGLAP   | PTH      |
| PGR     | ESR1     |
| NOS3    | ARG2     |
| PPP3CA  | FKBP1A   |
| PRKAA2  | PRKAG3   |
| PPARG   | IL2      |
| GRIN1   | GRIN3A   |
| DRD2    | SLC6A3   |
| ACTA1   | RAC1     |
| UBC     | SHMT1    |
| PPARA   | NFKBIA   |
| CYBB    | NCF2     |
| PAICS   | UBC      |
| ABL1    | FOS      |
| SYK     | PIK3R1   |
| GMPS    | UBC      |
| GRM8    | NPY      |
| AARS    | ASNS     |
| ALAS1   | INS      |
| OAZ1    | OAZ3     |
| B2M     | JUN      |
| UBC     | PYGL     |
| KCNJ11  | ABCC9    |
| LY96    | TLR2     |
| SUCLG1  | OGDH     |
| GARS    | DARS     |
| GLS     | GLUL     |
| GPI     | GCK      |
| UBC     | PFAS     |
| NFATC1  | PPP3R1   |
| GPI     | HK1      |
| PTGS2   | PLA2G1B  |
| SYK     | TLR4     |
| NAGS    | CAD      |
| KCNQ3   | KCNQ2    |
| CYP17A1 | HSD17B6  |
| ESR2    | FOS      |
| OAT     | ARG1     |
| HCK     | ABL1     |
| DARS    | AARS     |
| MT-CO1  | COX6C    |
| NR0B2   | RARA     |
| UBC     | ATF4     |
| UBC     | C22orf28 |
| ARG1    | OTC      |
| PRKCA   | UBC      |
| PPP3CA  | NFATC1   |
| THBD    | PROC     |
| TGFBR2  | UBC      |
| SUCLG1  | SDHB     |
| HTR1B   | HTR1A    |
| TP53    | PRKAB1   |
| FKBP1A  | ITPR1    |
| COX6A2  | COX7C    |
| KCNJ11  | KCNJ8    |
| PPP2CA  | PIN1     |
| CBS     | BHMT     |

|         |         |
|---------|---------|
| OPRM1   | OPRD1   |
| TLR4    | SRC     |
| OAZ2    | ODC1    |
| MAOB    | COMT    |
| WARS    | WARS2   |
| GAMT    | GATM    |
| MED1    | SULT2A1 |
| NFATC1  | PPARG   |
| SRD5A1  | SRD5A3  |
| ADCY5   | PRKACA  |
| ADSS    | ASS1    |
| GPI     | ALDOA   |
| SRC     | GRIN2B  |
| IARS    | ASNS    |
| CACNB4  | CACNA1A |
| ALAD    | ALAS2   |
| NOS1    | GRIN2A  |
| BCL2    | ITPR1   |
| PTGS1   | PTGIS   |
| SRC     | FOS     |
| SUCLA2  | SDHC    |
| TARS    | SARS    |
| PDPK1   | PIK3CA  |
| PRKCB   | NCF1    |
| NR0B1   | ESR1    |
| PIK3CG  | PIK3R1  |
| RPS6KA3 | ATF4    |
| MT-CO3  | COX6C   |
| UBC     | CDK6    |
| CYBB    | CYBA    |
| PTGS2   | PTGIS   |
| TOP1    | TP53    |
| UBC     | ARF6    |
| SUCLA2  | SDHB    |
| UBC     | PPP1CC  |
| NR0B1   | ESR2    |
| PLD1    | ARF6    |
| ATF4    | ATF2    |
| PSAP    | GBA     |
| PROC    | GGCX    |
| SCN5A   | SCN2B   |
| DCTD    | TYMS    |
| GOT1    | CAD     |
| HAO1    | AGXT    |
| AR      | MED1    |
| CAD     | GOT2    |
| HDAC9   | TP53    |
| TOP1    | UBC     |
| COMT    | DDC     |
| FOS     | CSNK2A1 |
| SRC     | PDPK1   |
| HARS    | TARS    |
| UBC     | GLUD1   |
| FOS     | NFKB1   |
| GRIN1   | GRIN2D  |
| ARF6    | PLD2    |
| TNF     | PTGS2   |
| TH      | FOS     |
| PDPK1   | PRKCB   |
| PRKAA1  | ACACB   |
| CACNA1B | CACNB3  |
| NR5A1   | CYP19A1 |
| GMPS    | PRKAG3  |
| GMPS    | PAICS   |
| GMPS    | PRKAG1  |
| UBC     | ARF1    |
| NOS1    | GRIN2B  |
| NR112   | NCOA1   |
| PPARG   | NFKB1   |
| UBC     | SDHA    |
| ALDOA   | GAPDHS  |
| ACOX1   | PPARA   |
| TNF     | NFKB2   |
| SHMT2   | GCSH    |
| PRKAA2  | PRKAA1  |

|          |          |
|----------|----------|
| ACOX1    | CPT1A    |
| HNF4A    | GCK      |
| NCF4     | RAC1     |
| CALM1    | CSNK2A1  |
| UBC      | CSNK2A1  |
| PPARG    | INS      |
| TARS2    | FARS2    |
| ADCY5    | GNAS     |
| PRKACA   | NFKB1    |
| GMPS     | CTPS1    |
| HK1      | UBC      |
| PIK3CG   | PDPK1    |
| PPP2CA   | BCL2     |
| PPARA    | INS      |
| CACNA2D1 | CACNB3   |
| SLC6A3   | DRD4     |
| TGFBR2   | CTNNB1   |
| HDAC9    | JUN      |
| GNAS     | ADRB2    |
| VDR      | TP53     |
| RXRG     | RARB     |
| SOD2     | CAT      |
| CALM1    | CACNA1C  |
| UBC      | SLC25A4  |
| FARS2    | TARS     |
| GRIN2A   | GRIN2B   |
| CACNB1   | CACNA1S  |
| UBC      | SHMT2    |
| CACNB1   | CACNA2D1 |
| GPI      | TPI1     |
| GCSH     | SHMT1    |
| EPRS     | CAD      |
| CRH      | NPY      |
| GPI      | GNPDA1   |
| CACNB1   | CACNA1C  |
| SUCLG2   | SDHC     |
| PRKCA    | PLD2     |
| HSD17B1  | CYP19A1  |
| PRKCA    | NFKBIA   |
| MTR      | CBS      |
| BCL2     | PIN1     |
| TP53     | ESR1     |
| RAC1     | ARF1     |
| SRC      | NCF1     |
| NCOA2    | MED1     |
| ADH1B    | ALDH1A1  |
| SLC25A4  | PPIF     |
| PTPN1    | CTNNB1   |
| HNF4G    | HNF1A    |
| PROS1    | PROC     |
| CYP1A2   | GSTM1    |
| SRC      | NFKB1    |
| IARS2    | FARS2    |
| UBC      | ATP5B    |
| CALM1    | NOS2     |
| COX5A    | COX6A2   |
| GLUL     | CAD      |
| JUN      | SRC      |
| CBS      | SHMT1    |
| CAD      | GAD2     |
| ACACB    | PRKAG2   |
| SCN3B    | SCN2B    |
| SHMT2    | TYMS     |
| COX6A2   | COX6B1   |
| GNAS     | PTH      |
| MT-CO2   | NOS2     |
| ALDH18A1 | NAGS     |
| SYK      | PIK3CG   |
| GAD1     | CAD      |
| PPARG    | NR0B2    |
| CTSD     | ESR1     |
| SUCLG2   | SDHB     |
| ARG1     | ODC1     |
| UBC      | ANXA5    |
| PTGS1    | PLA2G1B  |

|          |          |
|----------|----------|
| CTNNB1   | PPARD    |
| ESR2     | NR0B2    |
| SRC      | ADRB2    |
| SRD5A1   | AKR1D1   |
| HDAC2    | FOS      |
| BCL2     | PPIF     |
| AR       | ESR1     |
| RAC1     | PIK3CA   |
| TLR4     | NFKB1    |
| YARS     | FARSA    |
| PAH      | TAT      |
| PTDSS1   | PISD     |
| CACNA2D1 | CACNB2   |
| SCN4B    | SCN3B    |
| CTNNB1   | PIK3CA   |
| UBC      | TYMS     |
| RAC1     | NCF1     |
| AR       | NR0B2    |
| UBC      | AKR1B1   |
| RXRA     | RARA     |
| CALM1    | ITPR1    |
| PIK3CG   | SRC      |
| SRC      | NOS2     |
| PRKAG2   | PRKAB2   |
| ARG1     | ASL      |
| ARG1     | NOS1     |
| GRIN3A   | GRIN2B   |
| SRD5A1   | CYP19A1  |
| TP53     | NR0B2    |
| PRKCA    | SRC      |
| HNF4A    | TP53     |
| GRIN3A   | GRIN2A   |
| NCOA1    | RORA     |
| RXRA     | PPARG    |
| SLC25A18 | GUCA1A   |
| SUCLG1   | SDHC     |
| GLDC     | AGXT     |
| GAD2     | SLC32A1  |
| CACNB3   | CACNA1D  |
| RAC1     | PIK3R1   |
| LARS     | UBC      |
| PIK3R1   | EPOR     |
| NR1I3    | CYP1A2   |
| ALDH18A1 | CAD      |
| IKBKB    | PPP2CA   |
| F2       | PROC     |
| AR       | HNF4A    |
| VDR      | HNF4A    |
| ARG2     | OTC      |
| ACTA1    | SRC      |
| ADCY5    | ADCY2    |
| RUVBL1   | POLR2E   |
| PTPN1    | CSNK2A1  |
| MTR      | SHMT1    |
| HNF4A    | ESR1     |
| RAC1     | BCL2     |
| SRC      | EPOR     |
| GNAS     | ADRB3    |
| HK1      | PGM1     |
| F7       | F9       |
| CACNA1S  | CACNB2   |
| SYK      | JUN      |
| SHMT1    | AGXT     |
| TOP2A    | CSNK2A1  |
| BCL2     | NFKB1    |
| CAD      | ASNS     |
| ASL      | NAGS     |
| CACNB4   | CACNA2D1 |
| MAOB     | DDC      |
| INS      | NPY      |
| PRKAA1   | CFTR     |
| TP53     | NFKB1    |
| F10      | GGCX     |
| F2       | GGCX     |
| F7       | F10      |

|          |          |
|----------|----------|
| NCOA2    | CTNNB1   |
| TH       | TYR      |
| NCOA2    | RORA     |
| RARG     | RXRG     |
| ASL      | OTC      |
| SYK      | PTK2B    |
| CYP17A1  | SRD5A1   |
| CACNA1F  | CACNA2D1 |
| XDH      | CAT      |
| PDPK1    | INS      |
| OAT      | ODC1     |
| VDR      | RXRA     |
| APRT     | UBC      |
| PKIA     | PRKACA   |
| ESR2     | PPARG    |
| F2       | F9       |
| RAC1     | NOS2     |
| TAT      | GOT2     |
| HDAC2    | HDAC9    |
| JUN      | PPARA    |
| POLA1    | TYMS     |
| AR       | NR3C1    |
| RXRA     | NR1I2    |
| CDA      | UCKL1    |
| NR1H4    | ABCB11   |
| GSTP1    | CYP1A2   |
| AR       | NR5A1    |
| SLC7A1   | UBC      |
| SMPD4    | SMPD3    |
| NR1I2    | CYP2B6   |
| SHMT2    | AGXT     |
| CACNB4   | CACNA1S  |
| HTR7     | CRH      |
| CAD      | OTC      |
| UBC      | PRKCB    |
| PRKCA    | NOS1     |
| PRKACA   | CFTR     |
| ABCC8    | INS      |
| IGF2R    | M6PR     |
| CBS      | SHMT2    |
| FARS2    | WARS2    |
| CACNB1   | CACNG1   |
| JUN      | INS      |
| COMT     | SLC6A4   |
| HAO1     | CAT      |
| SLC25A15 | ASS1     |
| FOS      | ATF1     |
| GLUD1    | GOT2     |
| RAC1     | TLR2     |
| NOS3     | INS      |
| UBC      | AARS     |
| SRC      | INS      |
| SRC      | FHIT     |
| GLUD2    | GLUL     |
| CTSB     | CTSD     |
| NFATC1   | FOS      |
| PROS1    | F2       |
| RARA     | ESR1     |
| GAD2     | INS      |
| FOS      | NR3C1    |
| RXRG     | PPARG    |
| HSPG2    | SLAMF7   |
| ACSL3    | UBC      |
| RAC1     | PTK2B    |
| HSD3B1   | CYP11B2  |
| PROS1    | GGCX     |
| RXRA     | NR1I3    |
| YARS     | TARS2    |
| HDAC2    | JUN      |
| UBC      | FOS      |
| KCNJ1    | CFTR     |
| PGM1     | GCK      |
| SRC      | PLD2     |
| VDR      | RXRG     |
| SYK      | RAC1     |

|          |          |
|----------|----------|
| UBC      | FARSA    |
| CACNA2D1 | CACNG1   |
| EPRS     | ASNS     |
| CTNNB1   | YWHAE    |
| CHRNA4   | CHRNA2   |
| HSD11B1  | AKR1D1   |
| JUN      | NFKBIA   |
| PIK3R1   | NFKBIA   |
| ARG2     | ODC1     |
| CHRNA2   | CHRNA2   |
| F2       | PLAT     |
| TNF      | HSPA5    |
| CHRNA3   | CHRNA4   |
| ADRB3    | ADRB2    |
| ASS1     | SLC25A2  |
| GRIA1    | GRIA2    |
| RARA     | NR3C1    |
| IKBKB    | PRKCA    |
| PIK3CG   | FOS      |
| OAZ1     | OAZ2     |
| HTR1A    | HTR1D    |
| CHRNA4   | CHRNA4   |
| MED1     | RORA     |
| HSD3B1   | SRD5A1   |
| ABL1     | RAC1     |
| CYP17A1  | ESR1     |
| CACNA2D1 | CACNA1C  |
| CACNA1S  | CACNA2D1 |
| NAT1     | CYP1A2   |
| ADRA1A   | ADRA1B   |
| OPRK1    | OPRD1    |
| PRKACA   | NR3C1    |
| NR1I2    | ABCB11   |
| CACNB4   | CACNA1D  |
| RXRG     | NR0B2    |
| CHRNA2   | CHRNA4   |
| SIGMAR1  | SQLE     |
| TP53     | CTSD     |
| HSD17B6  | SRD5A1   |
| PIK3CA   | RAC2     |
| PTGS2    | FOS      |
| B2M      | LYZ      |
| CCBL1    | KYNU     |
| HMGCR    | PPARA    |
| YARS     | TARS     |
| HTR1B    | HTR1D    |
| CACNB4   | CACNA1C  |
| IKBKB    | TLR4     |
| CYP11B2  | HSD17B6  |
| AR       | NFKB1    |
| HDAC2    | CTNNB1   |
| SHMT2    | SDS      |
| UBC      | MIF      |
| KYNU     | AADAT    |
| ADRA1A   | ADRA1D   |
| SHMT1    | SDS      |
| HDAC2    | ISYNA1   |
| CTH      | MTR      |
| UBC      | DARS     |
| SRC      | ARF6     |
| HSD3B1   | HSD11B1  |
| HCK      | SRC      |
| ASS1     | ASNS     |
| AMY1A    | PYGL     |
| CYP2B6   | GSTM1    |
| MTR      | SHMT2    |
| UBC      | SCARB1   |
| GMPS     | ADSS     |
| GSTM1    | CYP2A6   |
| CXCL10   | CXCR1    |
| PAH      | DDC      |
| JUN      | NFATC1   |
| MT-CO3   | COX6A2   |
| PRKAG1   | PRKAB2   |
| GSTM1    | ADH1B    |

|          |         |
|----------|---------|
| HTR1A    | NPY     |
| IARS     | FARS2   |
| ABCA1    | SPTLC1  |
| HSD17B6  | AKR1D1  |
| CARS     | EPRS    |
| ARG1     | NOS2    |
| AMY2B    | PYGL    |
| AMY2A    | PYGL    |
| SUCLG1   | OXCT1   |
| FOS      | NPY     |
| FOS      | CRH     |
| GLDC     | AGXT2   |
| ADCY2    | PRKACA  |
| CTNNB1   | FOS     |
| RPS6KA3  | UBC     |
| CACNA1S  | CACNB3  |
| ACTA1    | PIK3CA  |
| AOX1     | ADH1B   |
| ALDH18A1 | UBC     |
| ALDH18A1 | GLUD1   |
| ALDH18A1 | GLUD2   |
| NCOA1    | MED1    |
| GSTP1    | CYP2B6  |
| ODC1     | OTC     |
| YARS2    | FARS2   |
| RAC2     | NFKB1   |
| VDR      | NR0B2   |
| UBC      | POLR2E  |
| TH       | JUN     |
| TP53     | NR3C1   |
| GLS      | GLUD1   |
| PGR      | JDP2    |
| TRPM8    | TRPA1   |
| NCOA2    | PPARA   |
| TNF      | BCL2    |
| UBC      | GSS     |
| ADCY5    | PRKCA   |
| INS      | ESR1    |
| CYBB     | NCF1    |
| PTH      | CRH     |
| UBC      | SLC7A11 |
| CACNA1D  | CACNG1  |
| PCTP     | ACOT13  |
| PTH      | CYP27B1 |
| PROC     | PROCR   |
| FOS      | INS     |
| MGMT     | TP53    |
| SYK      | IL2     |
| PRKACA   | YWHAE   |
| F2       | FURIN   |
| GSTP1    | GSS     |
| CACNA1F  | CACNB2  |
| COX8A    | COX7C   |
| ABL1     | GRIN2D  |
| F2       | PPARA   |
| CTH      | BHMT    |
| PIK3R1   | INS     |
| DPYD     | CYP2A6  |
| B2M      | IL2     |
| NFKB2    | NFKBIA  |
| SYK      | NFKB1   |
| IKBKB    | TLR2    |
| TP53     | PIK3CA  |
| FARSA    | FARS2   |
| HTR2A    | GRM1    |
| UBC      | ASNS    |
| CACNB4   | CACNA1F |
| CMPK2    | NME1    |
| SHMT2    | MTFMT   |
| SRC      | NOS3    |
| PIK3CA   | INS     |
| NR1H4    | NR0B2   |
| UBC      | PPIH    |
| GRIA2    | GRIA3   |
| FARS2    | LARS2   |

|          |          |
|----------|----------|
| LARS     | TARS     |
| PRKCA    | BCL2     |
| HSPA5    | PPIB     |
| MT-ND1   | MT-CO1   |
| RPS6KA3  | FOS      |
| ALDH18A1 | PYCR2    |
| ADSS     | PFAS     |
| GRIN1    | GRIN2C   |
| PRKCA    | PIK3CA   |
| GAD1     | GLS      |
| NR0B1    | CYP19A1  |
| GARS     | UBC      |
| GARS     | SARS     |
| XDH      | AOX1     |
| SYK      | FOS      |
| TP53     | PPIF     |
| PRKCA    | PDPK1    |
| DGKA     | PLD2     |
| HTR1B    | NPY      |
| CACNA1F  | CACNB3   |
| PTGS2    | NFKB1    |
| CYP17A1  | CYP19A1  |
| COX6A2   | COX4I1   |
| JUN      | NCOA1    |
| FURIN    | PROC     |
| GLS      | CAD      |
| TNF      | NFKB1    |
| PTDSS2   | PISD     |
| ACACB    | CPT1A    |
| GLS      | GAD2     |
| PGR      | MED1     |
| GSTP1    | CYP2A6   |
| ADCY5    | ADRA2A   |
| SYK      | RAC2     |
| PTGS2    | MT-CO2   |
| CTSA     | CTSD     |
| GNMT     | SHMT1    |
| PDPK1    | PIK3R1   |
| FOS      | HNF1A    |
| IKBKB    | SRC      |
| PAICS    | CAD      |
| ACSL3    | CPT1A    |
| UBC      | FADS1    |
| PRKAA1   | PRKAB2   |
| PPARA    | NR0B2    |
| CA9      | CTNNB1   |
| TNF      | IL2      |
| PROS1    | SERPINC1 |
| UBC      | KARS     |
| FURIN    | F9       |
| HSD17B6  | SULT1E1  |
| EPRS     | CARS2    |
| SHMT2    | PFAS     |
| GRM8     | CHRM2    |
| MT-CO1   | COX6A2   |
| MED1     | TP53     |
| PTGS2    | BCL2     |
| HNF1A    | INS      |
| GSTP1    | ADH1B    |
| ARG1     | NOS3     |
| PPARA    | SCARB1   |
| EPRS     | AARS     |
| PRKAB2   | PRKAG3   |
| CACNA1G  | CACNB2   |
| SOAT1    | UBC      |
| ACSL4    | CPT1A    |
| PPP3CA   | UBC      |
| SRC      | NR0B2    |
| PTPN1    | PIK3CA   |
| CTH      | CDO1     |
| GAD1     | GLUL     |
| HTR3A    | HTR7     |
| NR1H4    | FABP6    |
| CTPS1    | CAD      |
| BCL2     | ATF2     |



|         |         |
|---------|---------|
| SHMT2   | FTCD    |
| CACNB1  | CACNA1G |
| ACTA1   | PLD1    |
| ADH1B   | ALDH1A2 |
| SHMT1   | FTCD    |
| PIK3CA  | NFKB1   |
| JUN     | ACTA1   |
| GSTP1   | UBC     |
| HTR2A   | FOS     |
| NOS2    | ARG2    |
| PTK2B   | ITGB2   |
| TRPV1   | TRPA1   |
| AGXT    | SDS     |
| SRR     | SHMT1   |
| CYP2C8  | PTGS2   |
| CYP2B6  | SULT2A1 |
| ABCA1   | PPARG   |
| HSD17B6 | ALDH1A1 |
| HCK     | ITGB2   |
| GOT1    | ASNS    |
| GSTM1   | GSS     |
| GLUL    | GAD2    |
| IARS    | TARS    |
| GPI     | GAPDHS  |
| HARS    | UBC     |
| GOT2    | ASNS    |
| BCL2    | IL2     |
| TP53    | NME1    |
| GAMT    | CKM     |
| UBC     | PIK3R1  |
| DDC     | TYR     |
| HAO1    | DAO     |
| NOS3    | ASS1    |
| SUCLA2  | ALAS2   |
| HNF4A   | F2      |
| CARS    | YARS    |
| GLUL    | PPAT    |
| BCL2    | PGR     |
| UBC     | CBS     |
| FPGS    | TYMS    |
| PTGS2   | CTNNB1  |
| DRD2    | NPY     |
| MT-CO2  | MT-ND1  |
| UBC     | SCN5A   |
| SCN4B   | SCN2A   |
| NCOA2   | FOS     |
| IKBKB   | CTNNB1  |
| PLA2G2A | PTGS1   |
| TRAPPC3 | UBC     |
| GNAS    | ADRB1   |
| CTH     | CCBL1   |
| ATP2A1  | FURIN   |
| UBC     | FARSB   |
| NCOA2   | JUN     |
| NOS2    | NFKBIA  |
| GPT2    | GOT2    |
| EXT1    | HSPG2   |
| GOT1    | GPT2    |
| COX8A   | COX5A   |
| CACNA1I | CACNA1D |
| PDPK1   | NFKB1   |
| PRKCA   | NFKB1   |
| ABL1    | CDK6    |
| CALM1   | SCN5A   |
| CACNA1I | CACNA1C |
| TAT     | NR3C1   |
| P2RY12  | NPY     |
| MTR     | FTCD    |
| TH      | TAT     |
| F2      | CFTR    |
| CTH     | GOT1    |
| SRR     | SHMT2   |
| CTPS1   | NME1    |
| TRPV1   | KCNQ2   |
| CACNA1I | CACNA1S |

|          |          |
|----------|----------|
| PPP2CA   | YWHAE    |
| ALDH18A1 | ASS1     |
| GRM4     | HTR1A    |
| RPS6KA3  | ATF1     |
| YARS     | WARS2    |
| PTPN1    | EPOR     |
| GRM7     | HTR1A    |
| SHMT1    | MTFMT    |
| MAF      | SMARCA5  |
| JUN      | NOS2     |
| CYP2C8   | GSTM1    |
| MT-CO2   | PTGS1    |
| GPT      | GOT1     |
| SUCLA2   | SDHD     |
| UBC      | BCL2     |
| ACACB    | PRKAG3   |
| CTNNB1   | ACP1     |
| WARS     | UBC      |
| OPRM1    | NPY      |
| SCN1B    | SCN2B    |
| CTH      | GOT2     |
| PPP2CA   | RPS6KA3  |
| PPARA    | SULT2A1  |
| GRIN1    | NOS1     |
| JUN      | ACHE     |
| CYP19A1  | SULT1E1  |
| CACNA1G  | CACNA1C  |
| FKBP1A   | NFATC1   |
| GAD1     | SLC32A1  |
| PROS1    | SERPINA1 |
| PPP3CA   | NOS1     |
| ADCY2    | DRD1     |
| PPARG    | HSD11B1  |
| HTR7     | PTGIR    |
| TNF      | TP53     |
| CYP17A1  | CYP11B2  |
| NFKB1    | EPOR     |
| PRKCB    | PPP2CB   |
| NCOA1    | FOS      |
| OAT      | UBC      |
| UBC      | SIGMAR1  |
| CALM1    | UBC      |
| ITPR1    | INS      |
| ATF2     | ESR1     |
| PLD1     | PISD     |
| TARS2    | SARS     |
| TRPV3    | TRPM8    |
| CTNNB1   | CSNK2A1  |
| CACNA1H  | CACNA1C  |
| PRKCB    | NFKBIA   |
| AR       | PIK3CA   |
| GRIK2    | GRIK5    |
| CACNA1G  | CACNA1D  |
| LGALS7   | TP53     |
| AGXT     | DAO      |
| ABL1     | NFKBIA   |
| L3HYPDH  | DAO      |
| PGM1     | ALDOA    |
| YARS     | FARSB    |
| PIK3CG   | RAC1     |
| OPRM1    | DRD4     |
| CACNA1S  | CACNA1G  |
| SRR      | SDS      |
| TNF      | SRC      |
| KYNU     | CCBL2    |
| NOS2     | PPARA    |
| PPARD    | MED1     |
| CACNA1H  | CACNA1D  |
| NOS2     | ASS1     |
| CCBL1    | AADAT    |
| MGAM     | AMY2A    |
| NCF1     | RAC2     |
| HNF4G    | NR0B2    |
| ITGB2    | NFKB1    |
| CARS     | AARS     |

|         |         |
|---------|---------|
| GLDC    | GNMT    |
| HTR1D   | NPY     |
| GSTP1   | CYP2C8  |
| SOD2    | UBC     |
| GNMT    | SHMT2   |
| F2      | ESR1    |
| HSD17B6 | ALDH1A2 |
| RXRG    | PPARA   |
| CYP11B2 | HSD11B1 |
| AR      | FOS     |
| PRKCA   | ATF2    |
| CYP17A1 | SRD5A3  |
| DGKG    | PLD2    |
| RAB9A   | M6PR    |
| OPRK1   | NPY     |
| ACACB   | PRKAG1  |
| SDHB    | OGDH    |
| TP53    | CAT     |
| GSTP1   | TP53    |
| ASL     | CAD     |
| COMT    | UBC     |
| COMT    | ADH1B   |
| PPP1CC  | INS     |
| PLD1    | DGKG    |
| PAPSS1  | MTRR    |
| PISD    | PLD2    |
| HMGCR   | INS     |
| TOP2B   | UBC     |
| GRIN1   | CALM1   |
| SUCLG1  | SDHD    |
| PLD1    | DGKA    |
| VDR     | ESR1    |
| GLDC    | DAO     |
| APH1A   | PSENN   |
| JUN     | ARG1    |
| HTR7    | PTH     |
| HPGDS   | PTGIS   |
| CYP2C8  | CYP1A2  |
| GNAS    | ESR1    |
| DRD1    | CALY    |
| BCHE    | INS     |
| CACNB4  | CACNA1H |
| HK1     | ALDOA   |
| CACNB1  | CACNA1H |
| CACNA1I | CACNB2  |
| BCAT2   | GLUD1   |
| TARS2   | FARSB   |
| JUN     | HNF4A   |
| SCN1B   | SCN2A   |
| FXN     | ACO2    |
| CYP1A2  | CYP2B6  |
| ADRB2   | CFTR    |
| MT-CO2  | PPARA   |
| ADH1B   | ALDH2   |
| HSD3B1  | AKR1D1  |
| RAC1    | NOS3    |
| IL2     | NFKB1   |
| CACNB4  | CACNA1G |
| VDR     | AR      |
| NFKB1   | ESR1    |
| SYK     | PIK3CA  |
| CYP1A2  | CYP2A6  |
| HNF4A   | PPARA   |
| UBC     | PSENN   |
| F10     | FURIN   |
| SCN1B   | SCN4B   |
| PRKACA  | ITPR1   |
| PIK3R1  | NFKB1   |
| CBS     | SDS     |
| HLA-B   | UBC     |
| MED1    | NR0B2   |
| GLS     | PPAT    |
| PAH     | GOT1    |
| PROZ    | GGCX    |
| MTAP    | UBC     |

|         |         |
|---------|---------|
| RORA    | NR0B2   |
| CACNA1G | CACNB3  |
| COX8A   | COX5B   |
| ADRA2C  | ADRA2A  |
| DRD2    | GRM7    |
| CTNNB1  | BCL2    |
| TRPV1   | SRC     |
| RARG    | MED1    |
| PGR     | NR0B2   |
| SCN5A   | SCN4B   |
| P2RY12  | ADRA2A  |
| GCAT    | GLDC    |
| CACNA1S | CACNA1H |
| COX8A   | COX6C   |
| PLK1    | PIN1    |
| PPARA   | ESR1    |
| PIK3CA  | NFKBIA  |
| PPP2CA  | PPP3R1  |
| ALAS1   | PPARA   |
| EPRS    | ACACB   |
| HSD3B1  | CYP1A2  |
| GRM1    | HTR2B   |
| F7      | FURIN   |
| UBC     | PRKACA  |
| GALM    | GCK     |
| ADCY5   | HTR7    |
| RARB    | RARA    |
| SUCLG1  | ACACB   |
| CYP2B6  | ALDH1A1 |
| FECH    | FXN     |
| SUCLG2  | SDHD    |
| CYP11B2 | CYP19A1 |
| SYK     | NFKBIA  |
| MTR     | UBC     |
| ADCY2   | HTR7    |
| PGM1    | UBC     |
| ABCA1   | UBC     |
| PTGS2   | NFATC1  |
| ADCY5   | DRD2    |
| PTK2B   | IL2     |
| DRD2    | GRM8    |
| NOS1    | OTC     |
| HDAC9   | NOS3    |
| UBC     | GPRC5A  |
| PTGS2   | CYP2B6  |
| MTTP    | INS     |
| RUVBL1  | CAD     |
| IARS    | YARS    |
| PPARG   | TP53    |
| YARS2   | WARS2   |
| ADCY5   | DRD1    |
| DPP4    | CXCL10  |
| PAH     | GOT2    |
| NOS1    | ASS1    |
| CALM1   | PPP3R1  |
| PPP3R1  | PPP2CB  |
| SRC     | HNF1A   |
| ADSSL1  | ASS1    |
| RXRG    | MED1    |
| FOS     | PTH     |
| UBC     | METAP2  |
| NOS2    | OTC     |
| FARSB   | TARS    |
| SDHA    | COX4I1  |
| PRKCA   | YWHAE   |
| ASPA    | FOLH1   |
| CBS     | AGXT    |
| CHRM2   | NPY     |
| VDR     | PGR     |
| COX8A   | COX4I1  |
| KARS    | TARS    |
| HNF4A   | PPARG   |
| SCN4B   | SCN2B   |
| OPRM1   | DRD2    |
| ESR2    | PGR     |

|          |         |
|----------|---------|
| YARS     | AARS    |
| TRPV1    | TRPM8   |
| IARS     | TARS2   |
| SYK      | ITPR1   |
| GNAS     | F2      |
| OPRM1    | GRM8    |
| GOT1     | CDO1    |
| HCK      | SYK     |
| JUN      | F2      |
| ATF2     | IL2     |
| SRC      | ADRB3   |
| HCK      | PTK2B   |
| CACNA1A  | RAC1    |
| OPRD1    | DRD4    |
| IFNB1    | JUN     |
| CACNA1H  | CACNB2  |
| CACNA1I  | CACNB1  |
| NQO1     | ODC1    |
| TAT      | TYR     |
| PRKACA   | CACNA1C |
| ADCY5    | ADRB2   |
| PPARD    | NR0B2   |
| CACNB4   | CACNA1I |
| GRM7     | CHRM2   |
| GRM8     | HTR1A   |
| AR       | PIK3R1  |
| DCTD     | CMPK2   |
| ADCY5    | ADRB1   |
| AR       | ESR2    |
| LARS     | FARS2   |
| CTH      | CCBL2   |
| CYP11B2  | SRD5A1  |
| NPY      | DRD4    |
| TH       | GOT1    |
| NOS3     | OTC     |
| GSTP1    | GSTM1   |
| TH       | GOT2    |
| CA9      | TP53    |
| SRR      | AGXT    |
| ACTA1    | FOS     |
| GOT1     | GLUD1   |
| PTPN1    | PLD2    |
| SLC25A12 | GOT2    |
| GRM4     | NPY     |
| SUCLG2   | ACACB   |
| ADCY2    | DRD5    |
| UBC      | COX6B1  |
| TLR2     | CYP27B1 |
| AR       | PPARA   |
| SCN5A    | SCN3B   |
| HCK      | F2      |
| NR1H4    | RXRG    |
| NR5A1    | JUN     |
| GALM     | LCT     |
| COX8A    | COX6B1  |
| PTGS2    | HPGDS   |
| AR       | PPARG   |
| ADRB2    | PTH     |
| GABRB2   | GABRA1  |
| YARS     | IARS2   |
| CYP17A1  | INS     |
| UBC      | SARS    |
| MTR      | IL411   |
| ABCA1    | MED1    |
| GRM8     | OPRD1   |
| CHRNA1   | CHRND   |
| TH       | ATF2    |
| AOX1     | NNMT    |
| GRM4     | DRD2    |
| ANXA1    | NR3C1   |
| ARF1     | PIK3CA  |
| GRM4     | HTR1B   |
| CYP1A2   | ALDH1A1 |
| IFNB1    | NR3C1   |
| ARF6     | ARF1    |

|         |         |
|---------|---------|
| NPY     | OPRD1   |
| GMPS    | EPRS    |
| CACNB1  | CACNA1A |
| ABCA1   | RXRG    |
| PPIA    | PIN1    |
| CYP17A1 | CYP1A2  |
| GNAS    | HTR7    |
| LCT     | GCK     |
| CDO1    | GOT2    |
| NCF2    | ARF1    |
| EDNRA   | ANXA1   |
| UBC     | PLD2    |
| GAD1    | GAD2    |
| VDR     | PPARA   |
| YWHAE   | NFKB1   |
| CYP2C8  | ALDH1A1 |
| NOS2    | ATF2    |
| GNAS    | CRH     |
| MAOB    | ADH1B   |
| GLDC    | PIPOX   |
| B2M     | HSPG2   |
| NAT1    | CYP2A6  |
| PVR     | SRC     |
| PTGS2   | UBC     |
| GATM    | AGXT2   |
| GRM4    | CHRM2   |
| AOX1    | HSD17B6 |
| PGM1    | TPI1    |
| JUN     | MT-CO2  |
| UBC     | LYZ     |
| SUCLA2  | ACACB   |
| NCF4    | RAC2    |
| RAC1    | SH3RF1  |
| ADCY5   | DRD5    |
| GATM    | AGXT    |
| GABRB1  | GABRA1  |
| GRM7    | NPY     |
| PTPN1   | PIK3R1  |
| RXRG    | RORA    |
| DPYD    | SDHA    |
| HCAR2   | SUCNR1  |
| UBC     | EPOR    |
| HSD17B1 | SULT1E1 |
| GLO1    | AKR1B1  |
| PIK3CG  | RAC2    |
| NR5A1   | RORA    |
| MT-CO1  | COX8A   |
| PIPOX   | DAO     |
| F2      | TUB     |
| CTNNB1  | PSENEN  |
| PGR     | PPARA   |
| GLUD2   | GAD2    |
| CTNNB1  | PROC    |
| PRKACA  | NOS3    |
| PPP3CA  | PPP1CC  |
| PLA2G2A | PLD2    |
| POLR2E  | NME1    |
| HSPG2   | LYZ     |
| GAD1    | GLUD2   |
| PRKACA  | GRIA1   |
| NOS1    | NOS2    |
| PIK3R1  | IL2     |
| NFATC1  | MAF     |
| PTDSS1  | PTDSS2  |
| GABRA5  | GABRB2  |
| PAICS   | SHMT2   |
| GRM7    | DRD4    |
| GRIK2   | GRIA1   |
| GRM7    | OPRD1   |
| JUN     | FHIT    |
| ASPA    | ACY3    |
| IFNB1   | PTPN1   |
| FKBP1A  | TGFBR2  |
| HTR1B   | GRM7    |
| PGR     | HNF4A   |

|          |         |
|----------|---------|
| IFNB1    | FOS     |
| DRD2     | KCNJ5   |
| DRD1     | PTH     |
| CACNA1I  | CACNB3  |
| GNAS     | ADRA1B  |
| GABRA5   | GABRB3  |
| PTK2B    | GRIA1   |
| CTNNB1   | MED1    |
| HCAR3    | SUCNR1  |
| CACNA1H  | CACNB3  |
| SMPD4    | UGT8    |
| ALDOA    | GCK     |
| SLC25A12 | GOT1    |
| GNAS     | DRD1    |
| HDC      | HAL     |
| PRKCA    | GNAS    |
| SLC25A13 | GOT1    |
| HCK      | PIK3CG  |
| CACNA1I  | CACNA1G |
| PTGS2    | PPARA   |
| AR       | PGR     |
| PDPK1    | NFKBIA  |
| UCKL1    | CMPK2   |
| DDC      | TAT     |
| GABRA2   | GABRB1  |
| HNF4A    | PPARD   |
| DRD3     | GRM8    |
| VDR      | ESR2    |
| PROZ     | FURIN   |
| GRM4     | HTR1D   |
| XDH      | CYP1A2  |
| CACNA1G  | CTNNB1  |
| CYP19A1  | AKR1D1  |
| RPS6KA3  | HTR2A   |
| F10      | F2      |
| GABRB2   | GABRA4  |
| ESRRG    | MED1    |
| ADCY5    | OPRM1   |
| CYP17A1  | AKR1D1  |
| GABRB1   | GABRA4  |
| NR5A1    | RXRG    |
| SLC25A15 | OTC     |
| GABRA3   | GABRB2  |
| SLC25A13 | GOT2    |
| GABRB2   | GABRA6  |
| GABRA5   | GABRB1  |
| PIK3CG   | PIK3CA  |
| HTR1B    | DRD2    |
| UGT8     | SMPD3   |
| GPT      | GOT2    |
| HNF4G    | MED1    |
| GNAS     | PRKACA  |
| HTR7     | DRD5    |
| TAT      | BHMT    |
| ADRB1    | ADRB2   |
| HSPG2    | NCAN    |
| RARG     | NR0B2   |
| VDR      | PPARG   |
| UBC      | GOT2    |
| ADSS     | ASNS    |
| GABRB3   | GABRA1  |
| HTR1B    | DRD4    |
| AOX1     | ABAT    |
| ESR2     | RORA    |
| PTGS1    | HPGDS   |
| UBC      | OPRD1   |
| GABRG2   | GABRB2  |
| PROS1    | THBD    |
| PLD1     | PLA2G1B |
| GABRG2   | GABRA1  |
| NOS1     | ARG2    |
| GABRA3   | GABRB1  |
| RXRG     | PPARD   |
| TLR4     | RAC1    |
| CYP2A6   | ALDH1A1 |

|         |          |
|---------|----------|
| GNAS    | ESR2     |
| NR3C1   | ESR1     |
| PRKCA   | PIK3R1   |
| PTGIR   | PTH      |
| ESRRG   | PPARG    |
| CYP17A1 | SULT2B1  |
| TNF     | FOS      |
| HSD17B6 | SRD5A3   |
| GABRA2  | GABRB2   |
| OPRM1   | GRM7     |
| MAOB    | IL411    |
| RARB    | NR0B2    |
| PGR     | PPARG    |
| GRM4    | DRD4     |
| ADCY2   | PTH      |
| CHRM2   | OPRK1    |
| ESR2    | PPARA    |
| ESR2    | HNF4A    |
| OPRM1   | GRM4     |
| PLA2G2E | PTDSS2   |
| HTR1B   | GRM8     |
| GRM8    | OPRK1    |
| NCF4    | CYBB     |
| OAZ2    | OAZ3     |
| GABRB1  | GABRA6   |
| SHMT2   | AGXT2    |
| GCSH    | AGXT     |
| GLDC    | ALAS1    |
| ADRA1B  | ADRB2    |
| NAGS    | GLUD1    |
| HCAR3   | DRD3     |
| NR5A1   | ESR1     |
| GRIN2A  | GRIN2C   |
| HTR7    | DRD1     |
| DRD2    | OPRK1    |
| DARS2   | FARS2    |
| ESRRG   | HNF4G    |
| EDNRA   | NOS3     |
| CACNB2  | PRKACA   |
| HCAR2   | DRD3     |
| GRM8    | DRD4     |
| HTR7    | ADRB2    |
| PPARD   | HNF1A    |
| POLA1   | UBC      |
| GRIN2B  | GRIN2D   |
| HDAC9   | AR       |
| GABRA3  | GABRB3   |
| MT-CO3  | COX8A    |
| AR      | RORA     |
| PTK2B   | ARF1     |
| NOS3    | TP53     |
| OPRM1   | DRD3     |
| HNF4G   | RARG     |
| TGFBR2  | PPP1CC   |
| PPP3CA  | CALM1    |
| F7      | SERPINC1 |
| GABRG3  | GABRB2   |
| OPRM1   | HTR1B    |
| HK1     | GNPDA1   |
| PTGS1   | CYP2B6   |
| SUCLA2  | OXCT1    |
| ADRA2A  | NPY      |
| ARF6    | PIK3CA   |
| PIK3R1  | NR3C1    |
| GABRB3  | GABRA4   |
| VDR     | RARA     |
| MTR     | MTFMT    |
| VAR5    | EPRS     |
| HNF4A   | RARA     |
| DRD2    | HTR1A    |
| PPARA   | RORA     |
| UBC     | RUVBL1   |
| DRD2    | OPRD1    |
| ACTA1   | CTNNB1   |
| NR5A1   | RARA     |



|         |         |
|---------|---------|
| AR      | SULT2A1 |
| ADRB1   | ADRB3   |
| CHRM2   | HTR1D   |
| GRIK2   | GRIK1   |
| HK1     | GALM    |
| DRD3    | DRD4    |
| TLR4    | INS     |
| HCAR2   | GRM8    |
| F2      | HTR2C   |
| CYP2A6  | HSD11B1 |
| CHRNA7  | CHRNA4  |
| RORA    | ESR1    |
| HCAR2   | NPY     |
| DRD2    | DRD4    |
| NR5A1   | ESR2    |
| EDNRA   | EGF     |
| PPP1CC  | PPP3R1  |
| HTR1D   | OPRD1   |
| PRKACA  | GRIA4   |
| RORA    | RARA    |
| JUN     | CPT1A   |
| PGR     | RORA    |
| OPRM1   | HTR1A   |
| ABCA1   | INS     |
| PROS1   | FURIN   |
| GNAS    | EDNRA   |
| F10     | F9      |
| CTPS1   | POLR2E  |
| RAB9A   | IGF2R   |
| IARS    | INS     |
| CHRM2   | OPRD1   |
| GCAT    | ALAS1   |
| CYP1A2  | SULT2B1 |
| LARS    | IARS2   |
| NR1I2   | CYP2A6  |
| GRIN2A  | GRIN2D  |
| UBC     | OGDH    |
| PLA2G2A | FADS2   |
| ASPH    | JUN     |
| PPARD   | ESR1    |
| ESRRG   | PPARA   |
| PPP2CA  | SRC     |
| CTNNB1  | CDK6    |
| PLA2G1B | PLD2    |
| SDHB    | ATP5C1  |
| HNF4G   | PPARD   |
| GABRG2  | GABRA2  |
| DRD3    | OPRD1   |
| CHRNA7  | CHRNA2  |
| ADRA2C  | DRD4    |
| CYP11B2 | AKR1D1  |
| HTR1D   | DRD4    |
| VDR     | HNF4G   |
| ADCY5   | CHRM2   |
| GATM    | GLDC    |
| ASS1    | GOT2    |
| AOX1    | CYP1A2  |
| ADCY2   | CHRM2   |
| ATP5C1  | COX5A   |
| ADCY2   | NPY     |
| CYP19A1 | ESR1    |
| GRM4    | OPRD1   |
| DRD2    | CHRM2   |
| ESRRG   | RORA    |
| ADRA2A  | DRD4    |
| GABRA2  | GABRB3  |
| GLUD2   | GLS     |
| HARS    | KARS    |
| HTR1B   | CHRM2   |
| DRD3    | NPY     |
| GRM4    | OPRK1   |
| PRKCA   | GRIN2B  |
| AR      | RARA    |
| GABRG3  | GABRB3  |
| SRD5A3  | CYP19A1 |

|         |         |
|---------|---------|
| ADRB1   | HTR7    |
| DRD3    | OPRK1   |
| HNF4A   | RORA    |
| HNF4G   | PPARG   |
| ASPA    | ASS1    |
| PPARG   | RORA    |
| GRIN2C  | GRIN2B  |
| PTDSS1  | PLA2G2E |
| HNF4G   | RARB    |
| GABRG2  | GABRB1  |
| OPRM1   | ADCY2   |
| PPP1CC  | PRKACA  |
| HCAR3   | GRM8    |
| VDR     | RARG    |
| DRD3    | HTR1A   |
| RARB    | ESR1    |
| SHMT1   | ALAS1   |
| VDR     | PPARD   |
| NOS1    | PRKCB   |
| ADRA2B  | CHRM2   |
| GNMT    | AGXT    |
| GABRG2  | GABRA5  |
| HTR3A   | HTR1A   |
| RARG    | RORA    |
| HCAR2   | ADRA2A  |
| GABRG2  | GABRA3  |
| GABRB3  | GABRA6  |
| VDR     | RORA    |
| PLA2G2E | PTGS1   |
| NAT1    | XDH     |
| ADCY5   | ADRA2B  |
| CACNA1I | CACNA1H |
| HNF4G   | RARA    |
| MED1    | ACOX1   |
| HNF4G   | PPARA   |
| CYP1A2  | PPIG    |
| HNF4G   | NR5A1   |
| ESRRG   | HNF4A   |
| KYNU    | CAT     |
| GOT1    | ASS1    |
| GABRG2  | GABRB3  |
| CACNA1G | CACNA1H |
| PPP2CA  | PPP1CC  |
| ADRB3   | CRH     |
| OPRM1   | CHRM2   |
| HTR1A   | DRD4    |
| UBC     | SMARCA5 |
| MT-CO3  | MT-ND1  |
| ADCY5   | HTR1A   |
| HTR1B   | ADRA2A  |
| GMPS    | DHODH   |
| HTR3A   | FOS     |
| CYP17A1 | ESR2    |
| RARG    | HNF4A   |
| DRD2    | HTR1D   |
| ITGB2   | PROC    |
| NR5A1   | HNF4A   |
| F2      | ADRB2   |
| CYP2B6  | ALDH1A2 |
| CHRNA7  | CHRNA2  |
| ESR2    | RARB    |
| NOS2    | RAC2    |
| MT-CO2  | COX8A   |
| ADRB3   | HTR7    |
| GABRG3  | GABRB1  |
| NR5A1   | RARB    |
| CBS     | SRR     |
| HNF4G   | ESR2    |
| CYP2A6  | ALDH1A2 |
| NR5A1   | PPARA   |
| SHBG    | SULT2A1 |
| CHRNA7  | CHRN4   |
| F2      | NFKB1   |
| HNF4G   | RORA    |
| FPGS    | UBC     |

|         |         |
|---------|---------|
| GCAT    | ALAS2   |
| RARB    | HNF4A   |
| GRM1    | PIK3CA  |
| PPARG   | RARA    |
| DRD3    | GRM4    |
| DRD2    | ADCY2   |
| DRD3    | GRM7    |
| CTSB    | BCL2    |
| NOS1    | GRIN2D  |
| ADRA2C  | DRD3    |
| PGR     | RARA    |
| ADCY2   | HTR1A   |
| GNMT    | AGXT2   |
| ARF6    | PIK3R1  |
| JUN     | ACOX1   |
| GABRG2  | GABRA4  |
| ADCY5   | GRM4    |
| RARB    | RORA    |
| CYP2C8  | ALDH1A2 |
| ESR2    | RARA    |
| HNF4G   | ESR1    |
| PGR     | PGRMC1  |
| ERVW-1  | ENPEP   |
| HCAR2   | GRM7    |
| PPARA   | RARA    |
| VDR     | NR5A1   |
| GABRA5  | GABRG3  |
| GRM8    | GRM1    |
| CTNNB1  | GRIA2   |
| HCAR2   | GRM4    |
| CYP1A2  | ALDH1A2 |
| PTGIR   | CRH     |
| PIK3CA  | IL2     |
| HCAR3   | GRM4    |
| HNF4G   | RXRG    |
| GRM7    | GRM1    |
| VDR     | RARB    |
| GMPS    | ADSSL1  |
| DRD3    | CHRM2   |
| GRM8    | HTR1D   |
| CYP2C8  | PTGS1   |
| PGM1    | PYGM    |
| SUCNR1  | P2RY12  |
| UBC     | FADS2   |
| RAC1    | EDNRA   |
| CHRNA7  | CHRNA3  |
| PLA2G2E | FADS2   |
| HCAR3   | GRM7    |
| NFKB1   | PSENN   |
| PPP1CC  | PPP2CB  |
| NR5A1   | PGR     |
| RARG    | ESR1    |
| ESRRG   | AR      |
| ADCY5   | PTH     |
| PPARD   | RORA    |
| GABRG2  | GABRA6  |
| TLR4    | CXCL10  |
| RARG    | PPARG   |
| RARB    | PGR     |
| ESRRG   | PPARD   |
| GRM4    | GRM1    |
| OPRM1   | HTR1D   |
| HNF4G   | AR      |
| GCAT    | PIPOX   |
| ADRA1D  | HTR2B   |
| RARB    | PPARG   |
| HTR1B   | OPRD1   |
| ESRRG   | ESR1    |
| GATM    | DAO     |
| GLRA1   | GLRB    |
| RARG    | PPARA   |
| IKBKB   | LY96    |
| ADCY5   | ADRB3   |
| CSAD    | CDO1    |
| AKR1B1  | LCT     |

|          |          |
|----------|----------|
| ESRRG    | ESR2     |
| HCAR3    | OPRK1    |
| ESRRG    | PGR      |
| EPRS     | LARS2    |
| PIPOX    | AGXT     |
| ESR2     | PPARD    |
| HCAR3    | GPR18    |
| AR       | PPARD    |
| ADRA2C   | DRD2     |
| GOT1     | TAT      |
| HCAR2    | OPRK1    |
| ADSSL1   | ASNS     |
| HTR1A    | OPRK1    |
| PIK3R1   | RAC2     |
| HCAR3    | ADRA2A   |
| PTDSS2   | PLD2     |
| GLUD1    | GAD2     |
| MAOB     | AOX1     |
| GCAT     | SHMT2    |
| DRD2     | ADRA2A   |
| GLUD2    | NAGS     |
| SRC      | TLR2     |
| HTR2A    | HTR2B    |
| CHRM2    | DRD4     |
| SRC      | EGF      |
| DRD3     | HTR1B    |
| HTR1A    | P2RY12   |
| ADCY2    | ANXA1    |
| HNF4G    | PGR      |
| PAICS    | SHMT1    |
| DRD1     | CRH      |
| ADRA1B   | HTR2B    |
| ADRB2    | HTR2C    |
| IKBKB    | PDPK1    |
| NCOA2    | ABCA1    |
| SDHA     | OGDH     |
| ALDOA    | ESR1     |
| YWHAE    | PIN1     |
| ADRA2C   | GRM4     |
| ADRA1A   | HTR2A    |
| ALAS2    | AGXT     |
| SCN3B    | TP53     |
| SERPINA1 | ALDOA    |
| SMPD4    | UBC      |
| RARG     | PPARD    |
| ADCY5    | CRH      |
| ALAD     | FECH     |
| RARB     | PPARA    |
| PGM1     | RBKS     |
| PLA2G2E  | PTGS2    |
| ARG1     | SLC25A15 |
| OPRK1    | DRD4     |
| PGR      | PPARD    |
| ESRRG    | NR5A1    |
| AKR1B1   | GALM     |
| RXRG     | HNF4A    |
| HTR1A    | ADRA2A   |
| F10      | ITGB2    |
| PPARD    | RARA     |
| ACTA1    | CHRNA1   |
| RXRG     | BCL2     |
| ADCY5    | PTGIR    |
| UBC      | PLD1     |
| ADCY5    | NPY      |
| GAD1     | GLUD1    |
| SLC25A2  | OTC      |
| ALAS1    | AGXT     |
| HTR1A    | OPRD1    |
| UBC      | PRKAG1   |
| PRKCA    | PTK2B    |
| NOS2     | NR0B2    |
| HTR1B    | OPRK1    |
| CYP2C8   | CYP2B6   |
| PIK3R1   | ARF1     |
| AOX1     | CYP2A6   |

|          |         |
|----------|---------|
| DRD3     | HTR1D   |
| SDHB     | HSPA5   |
| CHRNA1   | CHRNA1  |
| ADRA2B   | ADRA2A  |
| ADRA2C   | CHRM2   |
| RARG     | AR      |
| PRKCB    | IL2     |
| ADRA2B   | DRD2    |
| NR5A1    | PPARD   |
| GRM7     | ADCY2   |
| NR5A1    | CYP17A1 |
| GABRG3   | GABRA1  |
| RUVBL1   | NME1    |
| PPP2CA   | PPP3CA  |
| RARG     | NR5A1   |
| ADRA2C   | HTR1D   |
| ADRA1D   | GRM1    |
| HTR1D    | OPRK1   |
| GABRA3   | GABRG3  |
| GABRA2   | GABRG3  |
| NOS2     | NOS3    |
| ALAS2    | AGXT2   |
| HCAR3    | NPY     |
| ADRA1D   | HTR2A   |
| ADCY5    | GRM7    |
| GRM7     | OPRK1   |
| HCK      | EGF     |
| ADSS     | UBC     |
| ADSSL1   | ASPA    |
| RARG     | ESR2    |
| ATF2     | NR3C1   |
| ADRA1B   | GRM1    |
| DRD3     | ADRA2A  |
| SHMT2    | DAO     |
| ADCY2    | NME1    |
| CYP2B6   | CYP2A6  |
| OPRM1    | ADRA2A  |
| ADCY5    | GRM8    |
| HSD3B1   | SRD5A3  |
| RARG     | PGR     |
| RARB     | MED1    |
| CHRNA2   | CHRNA3  |
| EDNRA    | HTR2B   |
| GRIN2C   | GRIN2D  |
| HTR2A    | EDNRA   |
| ADRA2B   | ADRA2C  |
| GATM     | SHMT2   |
| DRD1     | ADRB2   |
| NR5A1    | PPARG   |
| RARB     | PPARD   |
| GRIN2A   | GRIN3B  |
| NCOA1    | ACOX1   |
| ADRA1A   | GRM1    |
| GRM8     | ADRA2A  |
| GPR18    | ADRA2A  |
| GRM8     | ADCY2   |
| GRM4     | ADCY2   |
| HTR1B    | P2RY12  |
| VDR      | UBC     |
| GLDC     | ALAS2   |
| DRD5     | CRH     |
| ARAF     | JUN     |
| THBD     | F10     |
| VDR      | ESRRG   |
| HTR1D    | ADRA2A  |
| RXRG     | ESR1    |
| ADRA1D   | EDNRA   |
| GATM     | SHMT1   |
| AR       | RARB    |
| ALDH18A1 | ASNS    |
| LEPREL1  | LEPRE1  |
| CHRNA4   | CHRNA3  |
| CHRM2    | ADRA2A  |
| GLRB     | GLRA2   |
| CALM1    | CACNA1D |

|         |         |
|---------|---------|
| PIPOX   | AGXT2   |
| RXRG    | ESR2    |
| ADRA1D  | ADRA1B  |
| GPR18   | P2RY12  |
| ADRA2B  | DRD3    |
| DRD5    | ADRB2   |
| ESRRG   | RXRG    |
| GLRA3   | GLRB    |
| PLK1    | YWHAE   |
| ADRB2   | CRH     |
| PRKAG2  | PRKAG3  |
| WARS    | FARS2   |
| SHMT2   | ALAS2   |
| PTK2B   | PRKCB   |
| ADRA2A  | OPRD1   |
| F2      | FOS     |
| GRIN1   | GRIN3B  |
| ADCY5   | NME1    |
| ESRRG   | RARG    |
| CHRM2   | HTR1A   |
| EDNRA   | GRM1    |
| DRD3    | DRD2    |
| PPP3CA  | PPP2CB  |
| TH      | IL411   |
| ADRA2C  | OPRD1   |
| PTGS2   | NOS2    |
| ADRA1A  | HTR2B   |
| POLA1   | NME1    |
| GABRG3  | GABRA4  |
| GARS    | YARS    |
| PPIA    | NFATC1  |
| NOS1    | NOS3    |
| ADRA2A  | OPRK1   |
| DRD1    | DRD5    |
| ADCY5   | SUCNR1  |
| FARS2   | AARS    |
| SUCNR1  | GRM7    |
| PLA2G2A | CYP2B6  |
| GABRG3  | GABRA6  |
| GNMT    | DAO     |
| CACNA1D | CACNA1C |
| ADRA1B  | PIK3R1  |
| ALAS2   | SHMT1   |
| ADRB3   | DRD1    |
| SHMT2   | ALAS1   |
| ADRA2B  | OPRD1   |
| CYBB    | RAC1    |
| GAD1    | CDO1    |
| SRC     | CHRNA1  |
| SCN1B   | SCN5A   |
| ADRB1   | CRH     |
| CHRNA2  | CHRNA4  |
| GNAS    | PRKCB   |
| OPRM1   | OPRK1   |
| GCAT    | AGXT    |
| ADRA2B  | OPRK1   |
| IL2     | EPOR    |
| GABRA5  | GABRA4  |
| ADCY2   | EDNRA   |
| ADCY5   | HTR1D   |
| ADRA2C  | HTR1B   |
| SDHC    | OGDH    |
| ADRA2B  | DRD4    |
| SUCNR1  | GRM8    |
| ASPA    | ASNS    |
| GABRA2  | GABRA4  |
| PPARG   | PPARA   |
| HCK     | PIK3CA  |
| ADRB1   | PTH     |
| GRM4    | SUCNR1  |
| PRKCA   | RXRG    |
| MED1    | CPT1A   |
| GRM7    | HTR1D   |
| ADRA1D  | PIK3R1  |
| OPRM1   | ADRA2B  |

|         |         |
|---------|---------|
| DRD1    | PTGIR   |
| ESRRG   | RARA    |
| ADRA2B  | P2RY12  |
| RXRG    | PGR     |
| NR1I2   | SULT2A1 |
| ESRRG   | RARB    |
| PIK3CA  | NR3C1   |
| SRC     | CHRNA1  |
| CAD     | ASPA    |
| MT-CO2  | CTNNB1  |
| CHRNA2  | CHRNA3  |
| ADRA2C  | GRM8    |
| GABRA2  | GABRA6  |
| ADRA1A  | PIK3CA  |
| CACNB4  | CACNB2  |
| DRD5    | PTGIR   |
| GABRA4  | GABRA1  |
| GRM7    | ADRA2A  |
| ADSSL1  | GOT2    |
| PRKAG1  | PRKAG3  |
| AR      | RXRG    |
| ADRA2B  | HTR1B   |
| ADRA2B  | GRM7    |
| ADRA2B  | HTR1A   |
| ADRA1A  | PIK3R1  |
| ADRA2C  | HTR1A   |
| GOT1    | ADSSL1  |
| PLOD3   | PLOD1   |
| ADRA1B  | PIK3CA  |
| ADCY2   | ADRB2   |
| ADSS    | GOT2    |
| AOX1    | CYP2C8  |
| ADRB3   | ADCY2   |
| ADCY2   | CRH     |
| CACNB4  | CACNB3  |
| GOT1    | ADSS    |
| ADRA2B  | GRM4    |
| GABRA3  | GABRA4  |
| ADCY5   | EDNRA   |
| PIK3R1  | ANXA1   |
| HCAR3   | ANXA1   |
| CACNB2  | CACNB3  |
| PPARD   | PPARA   |
| UBC     | CPT1A   |
| GPR18   | HTR1A   |
| GRM4    | ADRA2A  |
| HK1     | LCT     |
| HTR2A   | ADRA1B  |
| ADRA2C  | GRM7    |
| SHMT2   | PIPOX   |
| ALOX5   | PTGS2   |
| SHMT1   | DAO     |
| CAD     | ACY3    |
| NCOA2   | CPT1A   |
| SHMT1   | PIPOX   |
| ADRA2B  | GRM8    |
| UBC     | ITPR1   |
| DRD2    | P2RY12  |
| GOT1    | ASPA    |
| CACNB4  | CACNB1  |
| CACNA1S | CACNA1D |
| ADRA1D  | PIK3CA  |
| ADRA1A  | EDNRA   |
| PPARD   | PPARG   |
| ADCY2   | OPRK1   |
| HTR1B   | CXCR1   |
| ABL1    | UBC     |
| CACNA1F | CACNA1D |
| HTR2B   | FFAR1   |
| HCAR2   | P2RY12  |
| GABRA5  | GABRA6  |
| CHRNA2  | CHRNA4  |
| NCOA1   | HMGCR   |
| CACNA1S | CACNA1C |
| ADRB1   | DRD1    |

|         |         |
|---------|---------|
| HCK     | CXCR1   |
| GATM    | GNMT    |
| CXCR1   | ADRA2A  |
| PIK3CA  | ANXA1   |
| KCNJ11  | PRKACA  |
| ANXA1   | NPY     |
| GATM    | SHMT1   |
| CACNB1  | CACNB2  |
| CACNA1F | CACNA1S |
| ADRB1   | ADCY2   |
| GABRA6  | GABRA1  |
| GRM1    | FFAR1   |
| CYP2B6  | PLA2G1B |
| ADCY2   | DRD4    |
| ABCA1   | NCOA1   |
| GRM8    | ANXA1   |
| GABRG2  | GABRG3  |
| CACNA1F | CACNA1C |
| GRM4    | GRM7    |
| GABRB3  | GABRB1  |
| GABRA3  | GABRA2  |
| OPRM1   | P2RY12  |
| GABRA2  | GABRA5  |
| ABCA1   | SCARB1  |
| RAC1    | RAC2    |
| DRD3    | ADCY2   |
| PLA2G2A | PISD    |
| UBC     | SLC7A2  |
| GLRA1   | GLRA2   |
| GABRA3  | GABRA6  |
| JUN     | CHRNA1  |
| GABRA3  | GABRA5  |
| GRM4    | GRM8    |
| PROS1   | EGF     |
| HNF4G   | HNF4A   |
| GATM    | PIPOX   |
| IL4I1   | TYR     |
| NCOA1   | SULT2A1 |
| GABRA3  | GABRA1  |
| PTDSS1  | PLD2    |
| ADCY2   | P2RY12  |
| PRKCA   | PRKCB   |
| NR5A1   | MED1    |
| CACNB1  | CACNB3  |
| DRD2    | GPR18   |
| GABRA6  | GABRA4  |
| PRKACA  | PTGIR   |
| GABRA2  | GABRA1  |
| HTR2A   | FFAR1   |
| NR0B2   | NFKBIA  |
| GPR18   | ANXA1   |
| HCAR3   | CHRM2   |
| GAD2    | CDO1    |
| GABRB1  | GABRB2  |
| GRM7    | GRM8    |
| GRM4    | ANXA1   |
| RARG    | RARA    |
| TAT     | MIF     |
| AOX1    | CYP2B6  |
| GRM4    | P2RY12  |
| GATM    | GCAT    |
| GNAS    | HTR2C   |
| GABRA5  | GABRA1  |
| ADCY5   | P2RY12  |
| PAH     | IL4I1   |
| ADRB1   | DRD5    |
| RARG    | RARB    |
| HSD3B1  | SULT2B1 |
| PLA2G2A | CYP1A2  |
| GRM1    | PIK3R1  |
| CTH     | SDS     |
| GOT1    | DDC     |
| FOS     | PPARG   |
| HCAR2   | HTR1B   |
| ADRA2B  | CXCL10  |



|          |        |
|----------|--------|
| CHRNA1   | PTK2B  |
| CXCR1    | ANXA1  |
| CHRM2    | ANXA1  |
| ADCY2    | HTR1D  |
| ABCC8    | PRKACA |
| HCAR3    | ADCY2  |
| UBC      | EGF    |
| DRD2     | ANXA1  |
| GNMT     | ALAS1  |
| ADRA1B   | HTR2C  |
| GRM8     | CXCR1  |
| ADRA2B   | ANXA1  |
| SUCNR1   | ADCY2  |
| CSAD     | BAAT   |
| TARS2    | IARS2  |
| ADRA2B   | NPY    |
| GPR18    | HTR1D  |
| GRM8     | GPR18  |
| ADSS     | ACY3   |
| SRD5A3   | AKR1D1 |
| PLA2G2E  | CYP1A2 |
| DRD2     | CXCR1  |
| PLA2G2E  | PLD2   |
| ADRA2C   | OPRK1  |
| PHOSPHO1 | ACHE   |
| PYCR1    | P4HA2  |
| GRM4     | CXCR1  |
| OPRM1    | GPR18  |
| PLD1     | PTDSS2 |
| ADRA1A   | FFAR1  |
| P2RY12   | CXCL10 |
| NCOA2    | FADS1  |
| HTR1B    | ADCY2  |
| ACTA1    | NFATC1 |
| PIK3R1   | HTR2B  |
| GRM7     | CXCL10 |
| ADSS     | ASPA   |
| NQO1     | GGCX   |
| GCAT     | DAO    |
| EGF      | PIK3CA |
| ADCY5    | HCAR2  |
| ADRA2C   | CXCR1  |
| ADRA2B   | ADCY2  |
| GRM8     | CXCL10 |
| PIK3CA   | FFAR1  |
| HTR1D    | P2RY12 |
| PLA2G2E  | CYP2C8 |
| P5CR2    | P4HA2  |
| ARF6     | EGF    |
| ADRA2B   | HTR1D  |
| PISD     | ESR1   |
| PRKAA1   | UBC    |
| ADCY5    | DRD3   |
| ADCY2    | CXCR1  |
| CXCR1    | OPRD1  |
| CHRNA1   | SRC    |
| NCOA1    | CPT1A  |
| PLA2G1B  | PTDSS2 |
| GRM7     | CXCR1  |
| RAC1     | EGF    |
| HCAR2    | CXCL10 |
| GRM4     | CXCL10 |
| ASPA     | GOT2   |
| ADRA2C   | GPR18  |
| GOT2     | MIF    |
| PYCR1    | P4HA1  |
| ADCY5    | DRD4   |
| DDC      | GOT2   |
| ARG1     | ATF2   |
| DDC      | IL4I1  |
| ADRA2A   | ANXA1  |
| P2RY12   | CXCR1  |
| HCAR2    | ADCY2  |
| ACY3     | ASS1   |
| SUCNR1   | NPY    |

|          |         |
|----------|---------|
| ADCY2    | PTGIR   |
| SUCNR1   | CHRM2   |
| ACY3     | GOT2    |
| GPR18    | CXCL10  |
| PHOSPHO1 | PCYT1B  |
| MED1     | HMGCR   |
| PLA2G1B  | PISD    |
| HTR1B    | SUCNR1  |
| NCOA1    | ALAS1   |
| PRKCB    | EGF     |
| GRM8     | P2RY12  |
| BAAT     | GAD2    |
| OPRM1    | CXCL10  |
| CYTH2    | EGF     |
| NFATC1   | CSNK2A1 |
| ADSS     | NFATC1  |
| P4HA1    | PYCRL   |
| ALAS2    | PIPOX   |
| CHRM2    | CXCL10  |
| SUCNR1   | OPRD1   |
| F2       | ADRA1B  |
| CXCL10   | ANXA1   |
| ANXA1    | DRD4    |
| DRD3     | ANXA1   |
| HCAR3    | HTR1D   |
| CTNNB1   | EGF     |
| SUCNR1   | CXCL10  |
| ADCY2    | CXCL10  |
| GATM     | ALAS2   |
| SUCNR1   | DRD4    |
| FOLH1    | ACY3    |
| CXCL10   | OPRK1   |
| ADRA2C   | HCAR2   |
| ADRA2C   | P2RY12  |
| HTR1B    | ANXA1   |
| IL411    | BHMT    |
| HCAR2    | ANXA1   |
| DRD3     | GPR18   |
| ADCY5    | ADRA2C  |
| SUCNR1   | HTR1D   |
| IFNB1    | ATF2    |
| HCAR3    | CXCR1   |
| TYR      | GOT2    |
| DRD5     | PTH     |
| ADRB1    | PTGIR   |
| IL411    | ASS1    |
| GNMT     | ALAS2   |
| GPR18    | CXCR1   |
| HCAR3    | ADRA2C  |
| SUCNR1   | GPR18   |
| HTR1D    | CXCR1   |
| HTR1D    | ANXA1   |
| HCAR3    | ADCY5   |
| CXCR1    | DRD4    |
| PLA2G2A  | PLD1    |
| GPR18    | OPRD1   |
| HCAR3    | ADRA2B  |
| PRKCA    | EGF     |
| NFATC1   | PRKACA  |
| HTR2A    | PIK3CA  |
| EDNRA    | FFAR1   |
| ADCY5    | CXCL10  |
| IL411    | ASNS    |
| PLD1     | DGKD    |
| ADSS     | IL411   |
| CXCL10   | NPY     |
| P2RY12   | ANXA1   |
| PIK3R1   | EGF     |
| NCOA2    | ALAS1   |
| PIPOX    | ALAS1   |
| LARS     | SARS    |
| PLA2G2A  | PTDSS2  |
| PPP2CA   | EGF     |
| GRM7     | ANXA1   |
| HCAR3    | HTR1B   |

|          |         |
|----------|---------|
| P2RY12   | DRD4    |
| HCAR2    | HTR1D   |
| CYP1A2   | PLA2G1B |
| HTR1A    | CXCR1   |
| HTR2A    | PIK3R1  |
| P2RY12   | OPRK1   |
| HTR1A    | CXCL10  |
| LALBA    | LCT     |
| GNAS     | DRD5    |
| ADRB2    | PTGIR   |
| ADRA2C   | NPY     |
| HCAR3    | CXCL10  |
| P5CR2    | P4HA1   |
| ADCY5    | ANXA1   |
| OPRK1    | ANXA1   |
| ALDOA    | EGF     |
| ADRA2B   | SUCNR1  |
| ADCY5    | CXCR1   |
| DRD3     | CXCR1   |
| ADRA2C   | SUCNR1  |
| DDC      | HAL     |
| ANXA1    | OPRD1   |
| ANXA1    | FFAR1   |
| ADRA1D   | ANXA1   |
| SUCNR1   | CXCR1   |
| PLA2G2A  | CYP2C8  |
| PRKACA   | RARA    |
| PIK3CA   | HTR2B   |
| HCAR2    | CXCR1   |
| MT-CO2   | NFKBIA  |
| ADRA1B   | FFAR1   |
| GRM1     | ANXA1   |
| GCAT     | AGXT2   |
| CYP2C8   | PLA2G1B |
| PTDSS1   | PLD1    |
| SLC25A22 | GUCA1A  |
| HTR1D    | CXCL10  |
| PLA2G2E  | PLD1    |
| DRD3     | P2RY12  |
| OPRM1    | ADRA2C  |
| GRM4     | GPR18   |
| SHMT1    | AGXT2   |
| PTPN1    | EGF     |
| DRD3     | SUCNR1  |
| IL411    | CAD     |
| ACY3     | ASNS    |
| PGM1     | NUDT9   |
| ALAS1    | DAO     |
| DGKD     | PLD2    |
| ADRB2    | ARF6    |
| PTDSS1   | PLA2G2A |
| ADRA1B   | ANXA1   |
| HCAR2    | OPRD1   |
| NCOA2    | SULT2A1 |
| CHRM2    | CXCR1   |
| MTR      | TAT     |
| CYP11B2  | SRD5A3  |
| ADRA1D   | FFAR1   |
| HCAR2    | DRD2    |
| PTK2B    | CHRN1B1 |
| HCAR2    | CHRM2   |
| GPR18    | DRD4    |
| OPRM1    | SUCNR1  |
| ADCY2    | ADRA2A  |
| ADRA2B   | CXCR1   |
| OPRM1    | HCAR2   |
| ADSSL1   | ACY3    |
| CXCL10   | ADRA2A  |
| CPT1A    | RORA    |
| DRD2     | CXCL10  |
| GLRA1    | GLRA3   |
| PLA2G1B  | FADS2   |
| EDNRA    | PIK3R1  |
| PPP2CA   | PPP2CB  |
| HCAR3    | P2RY12  |

|          |         |
|----------|---------|
| ALAS1    | AGXT2   |
| CXCL10   | DRD4    |
| HCAR3    | OPRM1   |
| PROS1    | ALDOA   |
| HCAR2    | GPR18   |
| ADRA1A   | ANXA1   |
| EDNRA    | PIK3CA  |
| CXCR1    | NPY     |
| GPR18    | OPRK1   |
| CHRM2    | P2RY12  |
| FTCD     | MTFMT   |
| TGFBR2   | PDPK1   |
| GOT1     | MIF     |
| GRM7     | GPR18   |
| JUN      | CHRNE   |
| ADRA2B   | GPR18   |
| PYCR1    | P4HA2   |
| HCAR2    | HTR1A   |
| PIK3R1   | FFAR1   |
| OPRM1    | ANXA1   |
| IKBKB    | PRKACA  |
| ADRB3    | PTGIR   |
| HCAR3    | OPRD1   |
| GRM7     | P2RY12  |
| MT-CO2   | NR0B2   |
| FADS1    | MED1    |
| GLRA3    | GLRA2   |
| HCAR3    | HCAR2   |
| ARG1     | SLC25A2 |
| CXCL10   | OPRD1   |
| ADCY5    | HTR1B   |
| ADCY5    | GPR18   |
| GPR18    | ADCY2   |
| LARS2    | AARS    |
| THBD     | JUN     |
| ADRA2B   | HCAR2   |
| ADCY5    | OPRK1   |
| DRD3     | CXCL10  |
| AR       | PRKACA  |
| IL411    | MIF     |
| HCAR2    | DRD4    |
| PGR      | PRKACA  |
| OPRM1    | CXCR1   |
| HTR2A    | ANXA1   |
| ADRB3    | PTH     |
| ALAS2    | DAO     |
| ALAS1    | MED1    |
| IL411    | ADSSL1  |
| HCAR3    | HTR1A   |
| ADRA2C   | CXCL10  |
| GAD1     | BAAT    |
| PHOSPHO1 | PCYT1A  |
| ADCY2    | POLR2E  |
| IL411    | ACY3    |
| HTR1B    | GPR18   |
| ADCY2    | OPRD1   |
| P2RY12   | OPRD1   |
| GABRB3   | GABRB2  |
| HTR1B    | CXCL10  |
| SUCNR1   | ANXA1   |
| GPR18    | CHRM2   |
| PTDSS1   | PLA2G1B |
| SERPINA1 | EGF     |
| SUCNR1   | OPRK1   |
| EDNRA    | ADRA1B  |
| PLA2G2E  | PISD    |
| GPR18    | NPY     |
| GOT1     | TYR     |
| SUCNR1   | DRD2    |
| ACHE     | ATF2    |
| HTR2B    | ANXA1   |
| SUCNR1   | HTR1A   |
| SUCNR1   | ADRA2A  |
| PLA2G2E  | CYP2B6  |
| CYTH2    | ADRB2   |

|          |         |
|----------|---------|
| GOT1     | ACY3    |
| HCAR3    | DRD2    |
| ATP6V1C1 | INS     |
| VDR      | TOP2B   |
| FADS1    | NCOA1   |
| ATF2     | RORA    |
| ADRB3    | DRD5    |
| IL411    | ASPA    |
| ACTA1    | PIK3R1  |
| ADCY5    | OPRD1   |
| ADRA2C   | ADCY2   |
| NCOA2    | HMGCR   |
| GATM     | ALAS1   |
| ITGB2    | PLAT    |
| PRKACA   | PLK1    |
| HCAR3    | DRD4    |
| HTR1A    | ANXA1   |
| ADRA2C   | ANXA1   |
| GCAT     | GNMT    |
| ADCY5    | POLR2E  |
| CXCR1    | OPRK1   |
| ALDH18A1 | GOT2    |
| JUN      | CDK6    |
| TLR4     | PPARA   |
| IKBKB    | TP53    |
| ADRB3    | PPARG   |
| HTR2A    | HTR3A   |
| YARS     | SARS    |
| EPRS     | AARS2   |
| BCL2     | F2      |
| PPARG    | SCARB1  |
| CTNNB1   | NME1    |
| GSTP1    | JUN     |
| PPARA    | FAAH    |
| PRKCA    | FOS     |
| ALDH18A1 | GOT1    |
| TLR4     | SFTPD   |
| PGR      | PAEP    |
| CACNB1   | CACNA1F |
| XDH      | NOS1    |
| UBC      | PPAT    |
| HARS     | TARS2   |
| XDH      | NOS3    |
| ATF6     | INS     |
| TNF      | NOS3    |
| PRKAG1   | HMGCR   |
| PAH      | TYR     |
| LARS2    | TARS    |
| KARS     | AARS    |
| EPRS     | IARS2   |
| ATF4     | INS     |
| HTR2A    | SLC6A4  |
| PGR      | PIK3CA  |
| GNAS     | IGF2R   |
| PDPK1    | PKN3    |
| CYP2B6   | HNF4A   |
| TP53     | LYZ     |
| TNF      | NFKBIA  |
| ADSSL1   | PFAS    |
| HMGCR    | PRKAG2  |
| TNF      | TLR4    |
| TP53     | CDK6    |
| TRPV1    | FOS     |
| UCKL1    | CAD     |
| MT-CO2   | COX6A2  |
| SLC13A2  | PPIB    |
| UBC      | P4HA2   |
| DPYD     | TYMS    |
| HTR3A    | HTR2C   |
| GARS     | TARS2   |
| GRIN1    | SRC     |
| PTGS2    | SRC     |
| EPRS     | FARS2   |
| YARS     | KARS    |
| PRODH    | PYCR1   |

|         |         |
|---------|---------|
| IARS2   | WARS2   |
| UBC     | ASS1    |
| NOS1    | GRIN2C  |
| MAF     | TP53    |
| PTK2B   | TP53    |
| PIM1    | UBC     |
| AKR1C3  | AR      |
| HCK     | RAC2    |
| PTGS2   | PPARG   |
| DPP4    | IL2     |
| JUN     | ESR2    |
| UBC     | PIN1    |
| NR1H4   | INS     |
| PPARA   | PON1    |
| CRH     | IL2     |
| RAC1    | F2      |
| GLUL    | GCLC    |
| ABL1    | INS     |
| MGAM    | ALAD    |
| PTDSS1  | UBC     |
| CTNNB1  | CAD     |
| GLUD1   | CAD     |
| ABL1    | IL2     |
| TARS    | AARS    |
| UBC     | PRDX5   |
| HDAC2   | PPARD   |
| SRC     | RAC2    |
| GLUD1   | ASNS    |
| GLUD2   | CAD     |
| UBC     | ACO2    |
| HTR1B   | FOS     |
| SCN10A  | SCN4B   |
| TP53    | PSENN   |
| HTR1B   | HTR3A   |
| ATF4    | SLC7A11 |
| PRLR    | IL2     |
| YARS2   | IARS2   |
| UBC     | GLS     |
| GRIA1   | GRIA4   |
| GMPS    | DPYD    |
| SRC     | ITGB2   |
| PPARG   | PON1    |
| NFKB2   | TP53    |
| TLR4    | NOS2    |
| UBC     | HIF1AN  |
| PFAS    | PRKAG2  |
| UBC     | PYGM    |
| TH      | SLC6A3  |
| FARS2   | AARS2   |
| CHRNA5  | CHRNA4  |
| RPS6KA3 | ESR1    |
| NOS1    | PAPSS1  |
| NOS3    | PAPSS1  |
| NOS2    | PAPSS1  |
| ACY1    | ASPA    |
| PRKAA2  | PRKAB2  |
| SHMT2   | SHMT1   |
| YARS    | WARS    |
| SRC     | FURIN   |
| SHMT1   | PFAS    |
| FOS     | HTR2C   |
| PTGS2   | PGR     |
| EPRS    | GLUL    |
| FKBP1A  | UBC     |
| PRKAA2  | UBC     |
| SRC     | ITPR1   |
| ABL1    | RAC2    |
| ABL1    | ESR1    |
| CACNB1  | CACNA1B |
| SYK     | ITGB2   |
| HDAC9   | CTNNB1  |
| TPI1    | GAPDHS  |
| IARS2   | AARS    |
| LARS    | TARS2   |
| CAD     | SARS    |

|          |         |
|----------|---------|
| HSPA5    | TP53    |
| YARS     | LARS2   |
| IARS2    | FARSB   |
| SRC      | GRM1    |
| GMPS     | PPAT    |
| LARS2    | AARS2   |
| EPRS     | DARS2   |
| ATP6V1C1 | UBC     |
| TNF      | ATF2    |
| VDR      | PTH     |
| NOS3     | PTH     |
| SCN2A    | SCN2B   |
| HTR7     | SLC6A4  |
| CHRNA4   | FOS     |
| ATF6     | UBC     |
| GLS2     | TP53    |
| PGR      | CA2     |
| YARS     | CARS2   |
| CYBB     | RAC2    |
| CACNB4   | CACNA1B |
| TLR4     | PTGS2   |
| PGR      | NME1    |
| FARS2    | SARS    |
| OAT      | ASS1    |
| EPRS     | FARSB   |
| LCN2     | INS     |
| UBC      | SRR     |
| CAT      | GSS     |
| GARS     | KARS    |
| SRC      | P2RY12  |
| EARS2    | AARS2   |
| UBC      | CAD     |
| PRLR     | UBC     |
| ACTA1    | INS     |
| VDR      | CYP27B1 |
| SRC      | NR3C1   |
| UBC      | PPIF    |
| SLC7A8   | SLC3A1  |
| KCNJ1    | SRC     |
| HARS     | AARS    |
| SQLE     | PTGIS   |
| LARS     | YARS    |
| PPP2CA   | PRKCA   |
| NCOA2    | NR0B1   |
| PLD1     | ARF1    |
| ALDOA    | PYGM    |
| TARS2    | KARS    |
| HDAC2    | NFKBIA  |
| TNF      | CYP19A1 |
| GARS     | TARS    |
| SDHB     | ATP5B   |
| COX5A    | PROC    |
| CYP2B6   | PPIG    |
| HMGCR    | PRKAG3  |
| PAEP     | INS     |
| TP53     | ANXA1   |
| SHBG     | INS     |
| NOS1     | NFKB1   |
| DBI      | UBC     |
| CYP2C8   | PPIG    |
| LARS     | AARS2   |
| PRKAA1   | HMGCR   |
| TH       | NPY     |
| DARS2    | YARS2   |
| TRPV1    | FAAH    |
| LARS     | GARS    |
| HARS     | YARS    |
| PRKAA1   | NME1    |
| GLUD1    | ASS1    |
| PTK2B    | RAC2    |
| PTGS2    | TLR2    |
| UBC      | PTK2B   |
| EPRS     | TARS    |
| VKORC1   | GGCX    |
| PRKCA    | ADCY2   |

|         |         |
|---------|---------|
| FOS     | PRKCB   |
| PIM1    | PTGS2   |
| GPI     | CSNK2A1 |
| TOP2A   | PRKCA   |
| PTGS2   | NR3C1   |
| NR0B1   | PPARA   |
| UBC     | CAT     |
| CA9     | SRC     |
| SOAT1   | INS     |
| NR0B1   | INS     |
| TLR4    | TLR2    |
| CACNA1C | INS     |
| NR0B1   | NR1I3   |
| CACNA1B | INS     |
| ATF3    | INS     |
| GOT1    | UBC     |
| TLR4    | CFTR    |
| GMPS    | UCKL1   |
| TRPV1   | INS     |
| CACNA1D | INS     |
| ATF4    | PPP1CC  |
| PRKAA1  | NOS3    |
| JUN     | RAC2    |
| CTNNB1  | PLK1    |
| UBC     | RAC2    |
| UBC     | SLC1A3  |
| SCN8A   | SCN2B   |
| PTK2B   | NOS3    |
| UBC     | GNPDA1  |
| ANXA5   | S100B   |
| MAF     | IL2     |
| UBC     | GBA     |
| ADRB3   | PPARA   |
| TOP2A   | PRKCB   |
| UBC     | ODC1    |
| OPRM1   | UBC     |
| LCN2    | TLR2    |
| PPP2CA  | PRKCB   |
| SRC     | SCARB1  |
| CACNA1S | CACNG1  |
| SDHA    | ATP5B   |
| NR1I2   | TP53    |
| YARS2   | AARS    |
| TNF     | PPARA   |
| JUN     | NOS1    |
| UBC     | PGRMC1  |
| SCN8A   | SCN4B   |
| PRKAA1  | TP53    |
| CACNA1B | SRC     |
| LARS    | VAR5    |
| SCN3B   | SCN2A   |
| CTNNB1  | SMARCA5 |
| DPYD    | GLUD1   |
| TLR4    | SCARB1  |
| CALM1   | GRIN2B  |
| KARS    | FARS2   |
| PPP3CA  | BCL2    |
| ALOX5   | SRC     |
| GCLM    | GLUL    |
| CA3     | INS     |
| TLR4    | CRH     |
| WARS    | TARS    |
| PRKAG1  | CAD     |
| PRKAG2  | CAD     |
| HSD3B1  | SQLE    |
| FOS     | TRPA1   |
| EARS2   | GLUL    |
| ABCA1   | TLR2    |
| CACNA1B | CACNB2  |
| COX7B   | COX5B   |
| PPP3CA  | CACNA1C |
| FECH    | UBC     |
| UBC     | PLOD3   |
| PRKAA2  | PPARA   |
| PPP2CA  | INS     |



|         |         |
|---------|---------|
| CAD     | PRKAG3  |
| JUN     | NR0B2   |
| ATF5    | ATF7    |
| YARS    | EARS2   |
| PRKCA   | PRKACA  |
| UBC     | PAPSS1  |
| HARS    | EPRS    |
| ATP2A1  | UBC     |
| DPYD    | GLUD2   |
| AR      | GNMT    |
| PRKAA2  | BCL2    |
| NR1I2   | SCARB1  |
| GMPS    | KARS    |
| PPARG   | ATF2    |
| OAT     | NAGS    |
| CACNA1A | INS     |
| ADCY2   | PRKCB   |
| CSAD    | CAD     |
| HDC     | CAD     |
| DDC     | CAD     |
| PRKACA  | ATF2    |
| SRC     | S100B   |
| DPP4    | HNF1A   |
| PPP2CA  | SLC6A4  |
| PRODH   | TP53    |
| NR0B1   | CTNNB1  |
| PRKCA   | PPP2CB  |
| DRD1    | GRIN2B  |
| HNF4A   | SCARB1  |
| UBC     | LCMT2   |
| UBC     | NADSYN1 |
| SLC18A2 | SLC6A3  |
| FOS     | DRD4    |
| TP53    | JDP2    |
| ATF4    | PTH     |
| HARS    | FARS2   |
| F2      | P2RY12  |
| WARS    | FARSB   |
| AARS    | SARS    |
| MAF     | PPARG   |
| NOS1    | BCL2    |
| GARS    | YARS2   |
| PTGS2   | PPARD   |
| ITGB2   | PIK3CA  |
| IARS2   | TARS    |
| MAN1B1  | MAN2A1  |
| TOP2A   | CTNNB1  |
| ATF5    | BCL2    |
| TLR4    | UBC     |
| CTH     | GCLM    |
| PRKAA2  | NOS3    |
| COMT    | FOS     |
| AR      | ATF3    |
| RAC1    | PLD2    |
| OPRK1   | SLC6A4  |
| NOS1    | CACNA1C |
| UBC     | ACACB   |
| OAT     | ASL     |
| TNF     | JUN     |
| JUN     | GNAS    |
| TNF     | DPP4    |
| PRKCA   | CTNNB1  |
| AR      | TRPM8   |
| PIK3CG  | ITGB2   |
| INS     | GCLC    |
| ESR2    | CRH     |
| TP53    | NFKBIA  |
| CTH     | PPAT    |
| UBC     | SPTLC2  |
| ATF2    | CSNK2A1 |
| ALDOA   | TPI1    |
| UBC     | PPP3R1  |
| NOS3    | ATF2    |
| YARS    | DARS    |
| SRC     | ATP1A1  |

|          |          |
|----------|----------|
| PRKCA    | GRIN2A   |
| PRKAA2   | HMGCR    |
| PTGS2    | F2       |
| UBC      | PPIB     |
| PTGS2    | NOS1     |
| HK1      | AKR1B1   |
| PDPK1    | PPARD    |
| SCN10A   | SCN2B    |
| SYK      | PLD2     |
| PRKAA2   | TP53     |
| UBC      | CYBA     |
| SCN8A    | SCN3B    |
| FARSB    | WARS2    |
| NQO1     | TP53     |
| AKR1B1   | GCK      |
| GLUD2    | ASNS     |
| IGF2R    | CTSD     |
| KCNQ3    | SRC      |
| ATP5C1   | COX5B    |
| SRC      | NOS1     |
| COX5A    | ATP5B    |
| SYK      | CFTR     |
| CTH      | UBC      |
| UBC      | MGMT     |
| NR1I2    | ALAS1    |
| JUN      | MT-ND1   |
| RAC1     | RHO      |
| ABCA1    | PCTP     |
| PTK2B    | F2       |
| NOS3     | NFKB1    |
| HTR1A    | SLC6A4   |
| DARS2    | LARS2    |
| TARS2    | WARS2    |
| GRM1     | GRIN2B   |
| F2       | NCF1     |
| PIN1     | PPIF     |
| ADCY5    | PRKCB    |
| PIN1     | NME1     |
| HSPG2    | BCL2     |
| ACSL3    | PPARA    |
| NR5A1    | CTNNB1   |
| JUN      | NFKB1    |
| DRD1     | GRIA1    |
| TARS2    | EPRS     |
| TARS2    | LARS2    |
| GARS     | IARS2    |
| YARS2    | LARS2    |
| CALM1    | ADCY2    |
| NOS1     | TP53     |
| CYP17A1  | SRC      |
| NR1H4    | NCOA1    |
| BCL2     | S100B    |
| NAGS     | ASNS     |
| EPRS     | FARSA    |
| COX7B    | COX7C    |
| SERPINA1 | UBC      |
| CACNB4   | CACNA2D2 |
| SRC      | PPARD    |
| UBC      | PGR      |
| LARS     | CARS     |
| UBC      | ISYNA1   |
| NR1H4    | ESR1     |
| ACACB    | OXCT1    |
| NOS1     | ITPR1    |
| NR1H4    | CYP19A1  |
| OXCT2    | ACACB    |
| DPYD     | UBC      |
| HNF4A    | MTTP     |
| SLC25A12 | UBC      |
| PRKCA    | ITPR1    |
| SHMT2    | GSS      |
| SRC      | PPP2CB   |
| SOD2     | TP53     |
| ALDOA    | PYGL     |
| SHBG     | HNF4A    |

|         |         |
|---------|---------|
| ITPR1   | GRM1    |
| FTCD    | CAD     |
| TNF     | PPARD   |
| CACNA1G | CALM1   |
| SDHC    | ATP5C1  |
| SCN1B   | SCN1A   |
| PRKCB   | ATF2    |
| UBC     | PYCR2   |
| SRC     | DGKA    |
| RARB    | NCOA1   |
| SDHB    | COX5B   |
| SHMT1   | GSS     |
| CACNA1A | UBC     |
| ACACB   | PRKAB1  |
| ABL1    | YWHAE   |
| UBC     | NQO1    |
| NCOA1   | NFKB1   |
| SCN1B   | SCN9A   |
| NCOA2   | ESRRG   |
| GNAS    | SRC     |
| TLR4    | CDK6    |
| GATM    | ACY3    |
| HSPG2   | IL2     |
| GATM    | ASS1    |
| MT-ND1  | INS     |
| PIK3R1  | TLR2    |
| HMGCR   | PRKAB1  |
| PTGS1   | ESR1    |
| LGALS7  | BCL2    |
| ABCA1   | CTSD    |
| LARS2   | WARS2   |
| BCL2    | CRH     |
| PTGS2   | PTH     |
| MGMT    | MLH1    |
| AR      | SARS    |
| F2      | RAC2    |
| PRKCA   | PPARG   |
| CTH     | GCLC    |
| UBC     | PYCRL   |
| ALOX5   | PTGS1   |
| PLD1    | RAC2    |
| EXT1    | NOS1    |
| BCL2    | METAP2  |
| CACNA1B | UBC     |
| UBC     | CTSD    |
| FARSB   | LARS2   |
| TP53    | PLAT    |
| GPI     | SRC     |
| SRD5A1  | INS     |
| GATM    | ASPA    |
| SLC6A5  | GLRA1   |
| CA9     | ATF4    |
| TH      | SLC18A2 |
| NCF4    | PRKCB   |
| SYK     | CALM1   |
| DRD1    | FOS     |
| NCF2    | NOS2    |
| CDA     | DCTD    |
| OGDH    | ACO2    |
| ARAF    | PIK3R1  |
| CHRNA4  | ACHE    |
| NOS3    | CAT     |
| DARS2   | AARS    |
| TLR4    | EPOR    |
| SLC6A4  | DRD4    |
| TARS2   | AARS    |
| RAC1    | NFATC1  |
| UBC     | GRIN2D  |
| HTR2A   | CACNA1S |
| LSS     | PTGIS   |
| SCN1A   | SCN2B   |
| FTCD    | HAL     |
| GLUD2   | ASS1    |
| GRIN1   | PRKACA  |
| CARS    | TARS    |

|          |          |
|----------|----------|
| CALM1    | GRIN2A   |
| GOT1     | GLUD2    |
| ARAF     | PRKCB    |
| F2       | CYBA     |
| RUVBL1   | TP53     |
| NCF2     | PRKCB    |
| MT-CO3   | BCS1L    |
| YARS2    | AARS2    |
| GRIN2A   | GRM1     |
| GMPS     | IARS     |
| RPS6KA3  | PLD1     |
| SCN1B    | PRKACA   |
| ANXA1    | CFTR     |
| CDO1     | GCLC     |
| NCOA2    | RXRG     |
| TNF      | TRPV1    |
| PRKACA   | GRIN2B   |
| HSPA5    | CFTR     |
| JUN      | ALDH1A1  |
| TNF      | TLR2     |
| PPP2CA   | NFKB1    |
| PRKCA    | ARAF     |
| GMPS     | TOP2A    |
| SLC25A10 | UBC      |
| NOS2     | CYBA     |
| ABL1     | ACTA1    |
| AR       | CYP19A1  |
| GRIN2A   | GRIA1    |
| UBC      | RABGGTB  |
| CHRNE    | CHRNA1   |
| UBC      | RHO      |
| CARS     | FARS2    |
| MT-ND1   | TP53     |
| NOS1     | PTK2B    |
| BGLAP    | GGCX     |
| EARS2    | YARS2    |
| ITPR1    | PRKCB    |
| SERPINC1 | UBC      |
| BCL2     | NR0B2    |
| PRKACA   | ATP1A1   |
| GLUL     | ASPA     |
| OAT      | CAD      |
| HDAC9    | PTGS2    |
| HDAC9    | PTH      |
| GOT1     | GOT2     |
| SCN10A   | SCN3B    |
| HARS     | IARS     |
| OAT      | PYCR1    |
| MT-CO2   | SRC      |
| CACNA1B  | CACNA2D1 |
| GCLM     | CDO1     |
| PPP2CA   | TGFBR2   |
| TP53     | DRD4     |
| TARS2    | YARS2    |
| PRKAA1   | BCL2     |
| AGXT2    | DAO      |
| AR       | PIM1     |
| PPP3CA   | CACNA1D  |
| NR5A1    | SCARB1   |
| GRIN2B   | GRIA2    |
| CYP2A6   | PPIG     |
| SLAMF7   | MAF      |
| TNF      | ABCA1    |
| PROS1    | COX5A    |
| HNF1A    | GCK      |
| ESR2     | NOS2     |
| IARS     | SARS     |
| NR113    | CYP2B6   |
| GRIA1    | GRIN2B   |
| YARS2    | FARSB    |
| DBI      | CALM1    |
| CTSA     | UBC      |
| PTPN1    | ATF4     |
| NR5A1    | SULT2A1  |
| HAO1     | AGXT2    |

|         |         |
|---------|---------|
| F2      | ANXA5   |
| UBC     | ESR2    |
| NCF4    | NOS2    |
| PTGS2   | S100B   |
| ABCC8   | PLK1    |
| PGR     | CYP19A1 |
| GRIA2   | GRIK5   |
| IFNB1   | PTGS2   |
| PIK3CG  | PGR     |
| PPP1CC  | GRIN2B  |
| CYBA    | RAC2    |
| GRIN2A  | GRIA4   |
| NR0B2   | NR3C1   |
| HTR3A   | HTR1D   |
| BCL2    | PLD2    |
| PTGS2   | RAC1    |
| FXN     | EPOR    |
| ANXA5   | CFTR    |
| HTR1B   | SLC6A4  |
| GARS    | FARS2   |
| PRKCA   | CACNA1A |
| IL411   | NAGS    |
| GOT1    | CSAD    |
| PTK2B   | PPARA   |
| COMT    | DRD4    |
| EPRS    | NR1I2   |
| GAD1    | ASNS    |
| IL411   | GOT2    |
| GRIN2A  | PRKACA  |
| EGF     | INS     |
| COX6C   | COX6A2  |
| GRIK3   | GRIK5   |
| EPRS    | YARS2   |
| PRKAG1  | CFTR    |
| GRIN1   | PPP1CC  |
| PRODH   | PPARA   |
| OPRM1   | GNAS    |
| SFTPD   | LY96    |
| EPRS    | GLUD1   |
| EARS2   | GLUD2   |
| PRKAG3  | CFTR    |
| GLUD2   | GOT2    |
| NCOA2   | NR5A1   |
| PPP2CA  | CACNA1C |
| UBC     | ALAS1   |
| EPRS    | GLUD2   |
| UBC     | SLC6A3  |
| NR0B1   | CYP17A1 |
| TNF     | SOD2    |
| CAMP    | HDAC9   |
| EARS2   | GLUD1   |
| GAD2    | ASNS    |
| GLUD1   | GCLC    |
| PRKAG2  | CFTR    |
| HDAC9   | CYP2B6  |
| CAT     | GCLC    |
| PRKACA  | GRIN2C  |
| GRIN1   | GRIA1   |
| PSAP    | TP53    |
| PRKACA  | GRIN2D  |
| HSD3B1  | LSS     |
| DDC     | SLC18A2 |
| HARS    | SARS    |
| GMPS    | VARS    |
| GRIN2A  | GRIA2   |
| ATF3    | GCK     |
| CACNB4  | PPP2CB  |
| DARS    | SARS    |
| ADSS    | NAGS    |
| HBA1    | SCN2A   |
| DPP4    | INS     |
| PDPK1   | NPRL2   |
| CACNA1G | INS     |
| IKBKB   | JUN     |
| CBS     | MTRR    |

|          |          |
|----------|----------|
| GRIK2    | GRID2    |
| UBC      | NR1I2    |
| GCLM     | GLUD1    |
| GRM1     | CFTR     |
| HDAC9    | SLC1A2   |
| RAB9A    | PGRMC1   |
| TNF      | CYBA     |
| HTR2A    | CACNA1C  |
| CALM1    | CACNA1H  |
| CACNA1A  | PRKCB    |
| GOT1     | IL4I1    |
| SHMT1    | SPTLC1   |
| PPP1CC   | GRIN2A   |
| OAZ1     | UBC      |
| SHBG     | CYP19A1  |
| UBC      | GRIA1    |
| GAD1     | GOT2     |
| GRIA4    | GRIN2B   |
| GLUL     | SLC1A3   |
| NR5A1    | SERPINA1 |
| GOT1     | GAD1     |
| GCLM     | GAD1     |
| DRD2     | COMT     |
| HDAC9    | ESR1     |
| DBI      | BCL2     |
| GMPS     | IARS2    |
| PPP1CC   | GRIA1    |
| CACNA2D2 | CACNB1   |
| LGSN     | GLUL     |
| PPP1CC   | CACNB2   |
| ATF5     | LCN2     |
| TOP2A    | TP53     |
| PPP2CA   | CACNB3   |
| EPRS     | SARS     |
| GAD2     | GOT2     |
| RAC2     | NFKBIA   |
| DRD1     | GAD2     |
| GOT1     | NAGS     |
| GOT1     | GAD2     |
| CACNB4   | PPP2CA   |
| ALDH18A1 | ASPA     |
| SHBG     | AR       |
| NOS1     | CACNA1D  |
| CACNB3   | PPP2CB   |
| PRKCB    | TYR      |
| GRIK1    | NOS1     |
| HDAC9    | PAEP     |
| ACMSD    | KYNU     |
| GRID2    | GRIK5    |
| PGR      | TP53     |
| CACNA1G  | CACNA2D1 |
| PTH      | INS      |
| PPP1CC   | CACNA1C  |
| GRIA1    | GRID2    |
| LARS     | FARSB    |
| VDR      | PPP1CC   |
| CSAD     | GOT2     |
| GLS      | PCYT1A   |
| PTGS2    | ACSL4    |
| GLS      | GCLC     |
| HDAC9    | ARG2     |
| FARSA    | TARS     |
| EPRS     | GLS      |
| JUN      | MAF      |
| COMT     | SLC6A3   |
| PRKACA   | CACNA1D  |
| SRC      | ACP1     |
| TOP1     | ASNS     |
| ADSS     | PPAT     |
| GARS     | WARS2    |
| PPP1CC   | GRIA2    |
| CACNA1S  | PRKACA   |
| SCN1B    | SCN8A    |
| CA1      | ALDH1A2  |
| HTR2A    | CACNA1D  |

|          |         |
|----------|---------|
| EARS2    | FARS2   |
| BCL2     | FFAR1   |
| NOS1     | CFTR    |
| FXN      | SDHB    |
| ASPH     | UBC     |
| GCLM     | GAD2    |
| PPP1CC   | GRIN2D  |
| IFNB1    | EPOR    |
| IARS     | WARS    |
| TRPV1    | PTGS2   |
| GCLM     | GLS     |
| CACNA1G  | NOS1    |
| PSAP     | CTSD    |
| PPP1CC   | GRIN2C  |
| NAGS     | GOT2    |
| PIK3CG   | CHRM2   |
| GARS     | FARSB   |
| UBC      | NR3C2   |
| ATP5C1   | UBC     |
| GRIN1    | GRIA4   |
| CTNNB1   | TP53    |
| SRC      | TP53    |
| SDHB     | COX4I1  |
| PAH      | TH      |
| ADSSL1   | NAGS    |
| BCAT1    | IL4I1   |
| GOT1     | GCLM    |
| GCLM     | GOT2    |
| ABCC8    | GCK     |
| VAR5     | YARS    |
| GRID2    | GRIA2   |
| BCL2     | NOS3    |
| AR       | SLC25A4 |
| CTNNB1   | ESR1    |
| PLD2     | CSNK2A1 |
| SHMT2    | SPTLC1  |
| NCOA2    | PGR     |
| YARS2    | SARS    |
| ATF5     | ATF6    |
| GLS      | FTCD    |
| PTGS2    | EDNRA   |
| CTNNB1   | PRKACA  |
| PPP1CC   | GRIA4   |
| CBS      | SPTLC1  |
| ALDH18A1 | ADSS    |
| GLUD1    | ASPA    |
| IL4I1    | BCAT2   |
| SCN5A    | PRKACA  |
| PTGS2    | NME1    |
| ALDH18A1 | ADSSL1  |
| ADCY5    | CALM1   |
| P5CR2    | PRODH   |
| PPP1CC   | GRIA3   |
| GRIN2A   | GRIA3   |
| NOS3     | SLC6A7  |
| BCAT1    | BCAT2   |
| GRIN2B   | GRIA3   |
| HSD17B1  | HSD3B1  |
| DRD5     | SLC6A3  |
| MT-CO1   | BCS1L   |
| GLS      | ASPA    |
| GPI      | PYGM    |
| TNF      | CYBB    |
| UBC      | ATF3    |
| MAF      | HAS1    |
| PPP2CA   | CACNB2  |
| MT-CO1   | NOS1    |
| CACNB2   | PPP2CB  |
| SLC7A1   | GCK     |
| PPP2CA   | CACNB1  |
| MUTYH    | MLH1    |
| SUCLG1   | DPYD    |
| FTCD     | ASS1    |
| GARS     | VAR5    |
| CACNB1   | PPP2CB  |

|          |         |
|----------|---------|
| TNF      | NOS1    |
| TNF      | MT-ND1  |
| GRIN1    | GRIA2   |
| GRIK1    | GRID1   |
| PRKACA   | GRIA2   |
| ALDH18A1 | ACY3    |
| SCN7A    | PRKACA  |
| EPRS     | GAD1    |
| UBC      | SLC1A4  |
| PRKACA   | GRIA3   |
| TARS     | WARS2   |
| GRIK2    | GRIA2   |
| GNAS     | GRM1    |
| RXRG     | NCOA1   |
| XDH      | TLR4    |
| SLC25A13 | ASS1    |
| ALAS2    | ALAS1   |
| SDHD     | IL2     |
| CALM1    | GRIN2C  |
| NFKB1    | PPP2CB  |
| DPP4     | DNPEP   |
| ACACB    | ME2     |
| PPT1     | ACSL4   |
| PPT1     | ACSL3   |
| SHMT1    | SPTLC2  |
| CACNA1D  | HTR2B   |
| SHMT2    | SPTLC2  |
| CALM1    | NOS1    |
| UCKL1    | UBC     |
| ESR2     | PTGIS   |
| CALM1    | GRIN2D  |
| CACNA1B  | CACNA1G |
| GATM     | ADSSL1  |
| IL411    | GLUD1   |
| IL411    | GLUD2   |
| PRKAB1   | CFTR    |
| ADSS     | GAD2    |
| DPP4     | NPY     |
| GRIN3A   | PPP1CC  |
| PPP1CC   | GRIN3B  |
| PPP2CA   | JUN     |
| ESR2     | NFKBIA  |
| CALM1    | PPP1CC  |
| COX7B    | COX6A2  |
| GRIK4    | GRIK2   |
| EPRS     | GAD2    |
| CTSB     | PPARD   |
| SOAT2    | SULT2B1 |
| SLC6A9   | UBC     |
| LARS2    | SARS    |
| PTGS2    | RAC2    |
| CALM1    | PYGL    |
| UBC      | ATF1    |
| GAD1     | GCLC    |
| GATM     | ASNS    |
| CACNB1   | PRKACA  |
| CACNB1   | PPP1CC  |
| ADSS     | GAD1    |
| GAD2     | ASS1    |
| PPT1     | UBC     |
| BHMT     | NFKB1   |
| ABCA1    | S100B   |
| IKBKB    | PRKAA1  |
| ASPA     | GAD2    |
| NOS1     | CACNA1H |
| PRKAA1   | PRKACA  |
| CACNB4   | CACNG1  |
| GRIN1    | GRIA3   |
| MAOB     | GLO1    |
| UBC      | NQO2    |
| GRIN1    | GRM1    |
| SDHA     | ACO2    |
| GATM     | IL411   |
| UBC      | NR0B2   |
| UBC      | GGCX    |



|          |          |
|----------|----------|
| UBC      | GLUD2    |
| PPP1CC   | ATF2     |
| DARS2    | EARS2    |
| PRODH    | PYCR2    |
| GLUD2    | GLUD1    |
| CARS     | UBC      |
| PRKAA2   | CFTR     |
| PRKCA    | ATF4     |
| ACTA1    | PLD2     |
| CACNA1A  | CACNB3   |
| AKR1C3   | LCN2     |
| ATF4     | PRKCB    |
| GAD2     | GCLC     |
| DRD2     | S100B    |
| PPP2CA   | CACNA1D  |
| VDR      | FOS      |
| CACNA2D3 | PRKACA   |
| CACNA1C  | HTR2B    |
| UBC      | COX5B    |
| KARS     | SARS     |
| SRR      | SPTLC2   |
| SRR      | SPTLC1   |
| DRD2     | PPP2CB   |
| GAD1     | ASPA     |
| PRKACA   | SCN1A    |
| CACNA2D1 | PPP2CB   |
| GATM     | CAD      |
| AGXT     | SPTLC1   |
| CACNA2D3 | PPP2CB   |
| CACNA2D3 | PPP1CC   |
| PRKCA    | SLC6A3   |
| PPP1CC   | CACNG1   |
| CACNA2D2 | PPP1CC   |
| PPP2CA   | CACNA1S  |
| ALDH18A1 | IL4I1    |
| SOD2     | RAC2     |
| ADSSL1   | GLUD2    |
| SMPD4    | TP53     |
| PPP1CC   | CACNB3   |
| SDS      | SPTLC2   |
| PPP2CA   | CACNA2D2 |
| CACNB4   | PRKACA   |
| ATF4     | PRKACA   |
| GLUD2    | FTCD     |
| GAD1     | FTCD     |
| GLS      | ACY3     |
| SLC8A1   | PRKACA   |
| GLUL     | FTCD     |
| CACNA1S  | PPP2CB   |
| GATM     | GOT2     |
| IL4I1    | FTCD     |
| SCN4B    | PRKACA   |
| PRKACA   | GRIN3B   |
| AKR1B1   | SDS      |
| EARS2    | GLS      |
| GAD1     | ACY3     |
| GATM     | GOT1     |
| PPP2CA   | CACNG1   |
| CACNB4   | PPP1CC   |
| FTCD     | ASNS     |
| GAD1     | EARS2    |
| PPP1CC   | TRPM8    |
| CBS      | SPTLC2   |
| GAD1     | ASS1     |
| ADSS     | FTCD     |
| TAT      | IL4I1    |
| GOT2     | GCLC     |
| GLUD2    | ACY3     |
| NAGS     | ACY3     |
| FTCD     | ACY3     |
| PRKCB    | SLC6A3   |
| CACNA2D3 | PPP2CA   |
| FTCD     | GLUD1    |
| GLUD2    | GCLC     |
| PPP1CC   | CACNA1D  |

|          |          |
|----------|----------|
| GAD1     | IL4I1    |
| PPP2CA   | CACNA2D1 |
| HARS     | WARS     |
| CACNA2D2 | PRKACA   |
| ADSSL1   | GAD2     |
| GLUD1    | ACY3     |
| GLUD2    | ASPA     |
| GOT1     | GCLC     |
| FTCD     | ASPA     |
| HDAC9    | THBD     |
| GOT1     | FTCD     |
| GRIN3A   | PRKACA   |
| SOAT1    | SULT2B1  |
| ADSSL1   | GLUD1    |
| SLC8A1   | CKM      |
| AGXT     | SPTLC2   |
| KCNJ5    | PRKACA   |
| IL4I1    | GAD2     |
| CACNG1   | PPP2CB   |
| PRLR     | IFNB1    |
| FTCD     | GOT2     |
| CACNA1C  | PPP2CB   |
| ADSS     | GLUD1    |
| CACNA1D  | PPP2CB   |
| GATM     | ADSS     |
| TGFBR2   | PPP2CB   |
| UBC      | PITPNA   |
| GAD1     | ADSSL1   |
| CACNA2D2 | PPP2CB   |
| GAD2     | ACY3     |
| CACNA2D1 | PRKACA   |
| EARS2    | GAD2     |
| NAGS     | ASPA     |
| GLUL     | ACY3     |
| CACNA1S  | HTR2B    |
| HDAC2    | RXRG     |
| PRKACA   | CACNB3   |
| CACNA1S  | PPP1CC   |
| CACNA1I  | CALM1    |
| GLO1     | SDS      |
| CACNA1I  | NOS1     |
| SPTLC1   | SDS      |
| PRKACA   | CACNG1   |
| GCLM     | GLUD2    |
| ADSS     | GLUD2    |
| MAOB     | AKR1B1   |
| FTCD     | GAD2     |
| CACNA2D1 | PPP1CC   |
| PPP2CA   | DRD2     |
| ADSSL1   | FTCD     |
| PTPN1    | NOS1     |
| MT-CO2   | BCS1L    |
| CACNA1B  | CACNA1H  |
| GRIN3A   | GRIA1    |
| PAICS    | ADSS     |
| FABP6    | HNF4A    |
| PRKCA    | ACTA1    |
| ESR2     | CYP19A1  |
| RAB9A    | UBC      |
| SOD2     | RAC1     |
| HNF4A    | FABP2    |
| UBC      | RABGGTA  |
| HDAC9    | BCL2     |
| TAT      | SDS      |
| UBC      | CTSB     |
| RPS6KA3  | PIK3CA   |
| DBI      | CYBB     |
| CARS     | TARS2    |
| COX7A1   | COX6A2   |
| PPP2CA   | CAD      |
| UBC      | PCYT1A   |
| SRC      | PPARA    |
| CTPS1    | PFAS     |
| GRIN3A   | GRIA4    |
| AARS     | WARS2    |

|          |         |
|----------|---------|
| ISYNA1   | CDIPT   |
| GLO1     | UBC     |
| ALDH18A1 | PRODH   |
| GMPS     | TOP2B   |
| FXN      | SDHA    |
| UBC      | CCBL2   |
| UBC      | ALDH1A2 |
| ABL1     | PTPN1   |
| MB       | CAT     |
| HTR2A    | PTGS2   |
| GPI      | PYGL    |
| MT-ND1   | NR1I2   |
| COX7A1   | COX4I1  |
| WARS     | KARS    |
| TOP2A    | TYMS    |
| GLUL     | SLC1A2  |
| FOS      | PIK3CA  |
| LARS     | YARS2   |
| YARS     | ASL     |
| NOS1     | OPRK1   |
| ATF2     | ATF1    |
| PRKACA   | NCF1    |
| HARS     | LARS    |
| WARS     | SARS    |
| IARS     | WARS2   |
| MT-ND1   | CACNA1A |
| LARS     | WARS2   |
| NOS1     | GCLC    |
| BCL2     | PPP2CB  |
| GRIA1    | GRM1    |
| ATF5     | ATF3    |
| GMPS     | SARS    |
| IKBKB    | BCL2    |
| DBI      | NOS3    |
| CARS     | KARS    |
| KARS     | YARS2   |
| GRIA4    | GRIN3B  |
| BCAT1    | UBC     |
| B2M      | UBC     |
| GABRQ    | HPGDS   |
| HTR3A    | HTR2B   |
| LCMT1    | PPP2CB  |
| PRKAG1   | PRKACA  |
| PPP2CA   | PRKAA1  |
| FECH     | ALAS2   |
| EPRS     | SQLE    |
| GRIA1    | GRIN3B  |
| AGXT     | OGDH    |
| HARS     | GARS    |
| LARS     | WARS    |
| IARS     | YARS2   |
| IARS2    | CAD     |
| IARS     | CAD     |
| COX7B    | COX6B1  |
| SDHC     | COX5A   |
| ATP5B    | COX5B   |
| DDC      | HNF1A   |
| VARs     | CAD     |
| GRIN3A   | GRIA2   |
| TOP2B    | CAD     |
| CARS     | SARS    |
| ACACB    | ACOX1   |
| VDR      | JUN     |
| NCF1     | NFKB1   |
| ATF6     | NR0B2   |
| DBI      | PRKCA   |
| TOP2A    | CAD     |
| CHRNA2   | HSPA5   |
| TRPV1    | ABCA1   |
| CACNA2D1 | CACNA1H |
| HDAC9    | CSNK2A1 |
| TOP2B    | TP53    |
| TARS2    | WARS    |
| CACNB2   | CACNG1  |
| CTSB     | INS     |

|          |         |
|----------|---------|
| CACNA2D2 | CACNA1A |
| IKBKB    | PPP2CB  |
| GRIA3    | GRIN3B  |
| GRIN2B   | GRIN3B  |
| GRIN3A   | GRIA3   |
| UBC      | BCAT2   |
| YARS2    | TARS    |
| CACNA1B  | CACNA1C |
| GRIA2    | GRIN3B  |
| GMPS     | FARS2   |
| TOP2B    | CSNK2A1 |
| RPS6KA3  | PIK3CG  |
| DARS2    | AARS2   |
| HMGCR    | SQLE    |
| INS      | CTSD    |
| SDHC     | COX5B   |
| UBC      | PYCR1   |
| CACNA1F  | CACNA1G |
| SRR      | DAO     |
| ABL1     | PIK3CA  |
| GRIN1    | DRD1    |
| SHMT1    | MTRR    |
| HDAC2    | NR3C1   |
| COX6C    | ATP5E   |
| SDHB     | ATP5A1  |
| KCNJ5    | ADRB2   |
| SDHB     | UBC     |
| ABCA1    | NFATC1  |
| CAT      | DAO     |
| ALDH18A1 | ACACB   |
| KCNJ5    | DRD4    |
| AR       | CYP17A1 |
| PFAS     | DHODH   |
| HDAC9    | TOP1    |
| SCN10A   | TRPV1   |
| THNSL1   | ODC1    |
| TARS2    | FARSA   |
| CYTH2    | ITGB2   |
| HTR2C    | SLC6A4  |
| SHMT2    | CAD     |
| CARS     | YARS2   |
| MUTYH    | UBC     |
| AR       | RUVBL1  |
| HDAC2    | ESR1    |
| TARS2    | UBC     |
| S100B    | GUCA1A  |
| WARS2    | SARS    |
| HDAC9    | YWHAE   |
| FOS      | DRD5    |
| SDHB     | COX5A   |
| CARS     | WARS2   |
| GMPS     | ACACB   |
| CACNA1B  | CACNA1D |
| UBC      | CACNA1C |
| CARS2    | AARS2   |
| AARS     | CARS2   |
| CARS     | AARS2   |
| PRKACA   | PRKAG2  |
| WARS     | AARS    |
| ATF5     | ATF2    |
| TP53     | MIF     |
| SERPINC1 | COX5A   |
| PRODH    | PYCRL   |
| TNF      | HSD11B1 |
| ACACB    | ATP5A1  |
| UBC      | IARS2   |
| TARS     | DARS    |
| FARSB    | SARS    |
| CARS     | IARS2   |
| KCNJ11   | INS     |
| SLC6A5   | GLRB    |
| BCL2     | FOS     |
| ATP2A1   | ITPR1   |
| PIK3CG   | PRKCB   |
| TOP2A    | SARS    |

|         |          |
|---------|----------|
| DARS2   | UBC      |
| GLUL    | ASNS     |
| CACNA1B | CACNA1S  |
| PCCB    | ACACB    |
| UBC     | SH3RF1   |
| LARS2   | DARS     |
| CARS    | IARS     |
| SLC6A14 | SLC7A9   |
| GNMT    | BHMT     |
| COX7B   | COX5A    |
| GRIK2   | KARS     |
| JUN     | TOP1     |
| ACHE    | CHRNE    |
| ATF3    | NFKB1    |
| CHRNA3  | CHRNA5   |
| GRIK1   | KARS     |
| CAT     | NFKB1    |
| CACNA1F | CACNA1H  |
| HDAC2   | RARA     |
| SRC     | BCL2     |
| CACNB3  | CACNG1   |
| SCN1B   | SCN3B    |
| UBC     | ACP1     |
| CHRNA4  | CHRNA5   |
| WARS    | YARS2    |
| MT-CO2  | NOS3     |
| NR5A1   | NCOA1    |
| GMPS    | CARS     |
| UBC     | COX4I1   |
| GLYAT   | BAAT     |
| NR0B1   | PGR      |
| HDAC2   | AR       |
| ATF7    | FOS      |
| ATP5A1  | EFTUD1   |
| SCN1B   | SCN3A    |
| CHRNE   | CHRNA4   |
| CHRNA1  | CHRNA1   |
| HARS    | DARS     |
| OGDH    | DHODH    |
| COX8A   | PYGM     |
| HARS    | GMPS     |
| CACNA1A | CACNB2   |
| WARS    | DARS     |
| FARS2   | DARS     |
| GMPS    | MTAP     |
| ECI2    | ACOX1    |
| COX7A1  | COX6B1   |
| MB      | LYZ      |
| HBA1    | INS      |
| BCL2    | ESR1     |
| FABP6   | ABCB11   |
| F2      | INS      |
| GRIA1   | GRIA3    |
| CACNA1B | OLFM1    |
| SDHB    | ACO2     |
| TNF     | INS      |
| KCNJ11  | GCK      |
| SLC18A2 | HDC      |
| TP53    | INS      |
| SLC18A2 | SLC6A4   |
| SLC6A5  | GARS     |
| THNSL1  | CAD      |
| ACY1    | UBC      |
| PFAS    | CLPP     |
| TOP2B   | SARS     |
| VDR     | BGLAP    |
| PGRMC1  | M6PR     |
| PLD1    | ACTG2    |
| ACTG2   | PLD2     |
| GABRG2  | NUDT9    |
| KCNQ2   | SLC25A22 |
| GMPS    | CARS2    |
| FURIN   | ENPEP    |
| APRT    | NQO1     |
| PAPSS1  | CAD      |

|          |         |
|----------|---------|
| NR1I3    | MED1    |
| SHMT1    | CAD     |
| PITPNA   | YWHAE   |
| OAT      | AGXT    |
| GMPS     | FARSB   |
| CHRNA3   | CHRNA6  |
| CTRB1    | TAT     |
| UBC      | KYNU    |
| COX7C    | ATP5E   |
| CHRNA5   | CHRNA6  |
| ABL1     | PIK3CG  |
| GMPS     | JDP2    |
| PTGIR    | PTGIS   |
| GABRG2   | SCN1B   |
| GABRG2   | SCN9A   |
| TH       | SLC6A2  |
| DPP4     | FOLH1   |
| CHRNA3   | CHRNA3  |
| GABRG2   | SCN1A   |
| ESRRG    | SLC7A1  |
| DPYD     | PAPSS1  |
| CHRNA4   | CHRNA3  |
| PIM1     | CDIPT   |
| MB       | LALBA   |
| CHRNA2   | CHRNA5  |
| DRD2     | SLC6A4  |
| FPGS     | SHMT1   |
| SUCLA2   | UBC     |
| GMPS     | SHMT2   |
| LCT      | HNF1A   |
| SUCLG2   | UBC     |
| HSD17B1  | CYP17A1 |
| HSD17B11 | UBC     |
| HNF4G    | MTTP    |
| HSPA5    | ATP5A1  |
| TNF      | NOS2    |
| RNASE1   | GLUD1   |
| SDHA     | DHODH   |
| UBC      | CDIPT   |
| QPRT     | ACMSD   |
| NOS3     | HMGCR   |
| CARS     | WARS    |
| GARS     | LARS2   |
| CHRNA4   | CHRNA4  |
| GRIN1    | ITPR1   |
| DARS2    | PLK1    |
| CACNA1C  | CACNG1  |
| EPRS     | WARS2   |
| PFAS     | ASL     |
| PRLR     | SRR     |
| CHRNA2   | CHRNA3  |
| HDAC2    | HIF1AN  |
| CHRNA7   | CHRNA6  |
| APRT     | TAT     |
| SLC7A11  | SLC3A1  |
| VARS     | IARS    |
| CACNA1B  | CACNG1  |
| APRT     | GOT2    |
| ANXA5    | TP53    |
| CHRNA2   | CHRNA2  |
| GLUL     | OGDH    |
| CHRNA7   | CHRNA5  |
| GLDC     | DPYD    |
| SCN10A   | SCN2A   |
| ARAF     | FOS     |
| BCS1L    | UBC     |
| CHRNA1   | CHRNA2  |
| GARS     | CARS    |
| CHRNA7   | CHRNA1  |
| TH       | ACHE    |
| CHRNA7   | CHRNA4  |
| PTK2B    | GRIN2B  |
| IARS     | PFAS    |
| CHRNA2   | CHRNA4  |
| SLC6A4   | HTR2B   |

|          |         |
|----------|---------|
| SCN5A    | SCN2A   |
| ACADSB   | HIBCH   |
| CHRNA4   | CHRNA4  |
| HARS     | LARS2   |
| SLC25A12 | OGDH    |
| GRIK2    | GRIN1   |
| FURIN    | CTSD    |
| PRKCA    | GRIN1   |
| FKBP1A   | NME1    |
| CHRNA4   | CHRNE   |
| SUCLG1   | GNAS    |
| GLUD1    | ACO2    |
| YARS     | AARS2   |
| UBC      | IFT122  |
| SCN8A    | SCN2A   |
| SLC26A8  | CFTR    |
| SCN3A    | SCN2B   |
| GABRG2   | SCN2A   |
| VARA     | FARS2   |
| DNPEP    | ENPEP   |
| TH       | HTR7    |
| ARAF     | YWHAE   |
| ALDH18A1 | ASL     |
| LARS2    | CAD     |
| CHRNA4   | CHRND   |
| UBC      | HSD11B1 |
| CHRNA4   | CHRNA5  |
| TAT      | GLUL    |
| CHRNA7   | CHRNA3  |
| LARS     | CAD     |
| FKBP1A   | PIN1    |
| PRKCA    | TP53    |
| CACNA1H  | CACNG1  |
| GMPS     | YARS    |
| SLC6A5   | SLC32A1 |
| SCN10A   | SCN8A   |
| UBC      | PLOD1   |
| CACNA1F  | CACNA1B |
| VARA     | TARS    |
| ATP5A1   | SDHA    |
| PCCB     | CAD     |
| AKR1C3   | SRD5A1  |
| COX6C    | COX7A1  |
| CHRNA4   | CHRNA5  |
| VARA     | NOS3    |
| CHRNA2   | CHRNA3  |
| CHRNA2   | CHRNA6  |
| SRC      | NR1H2   |
| CHRNE    | CHRND   |
| JUN      | PPP2CB  |
| TH       | GAD1    |
| BCL2     | CAT     |
| CARS     | LARS2   |
| CACNA1F  | CACNG1  |
| CHRNA3   | CHRNA4  |
| FARS2    | CAD     |
| IARS2    | SARS    |
| PGM1     | GOT2    |
| SOD2     | ACO2    |
| SCN1B    | SCN10A  |
| CHRNA4   | CHRNA6  |
| CHRNA4   | CHRNA3  |
| CHRNA4   | CHRNA1  |
| CHRNA3   | CHRND   |
| GRIN2C   | GRM1    |
| TP53     | YWHAE   |
| HTR1D    | FOS     |
| MGMT     | ESR1    |
| YARS     | CAD     |
| CHRNA2   | CHRNA1  |
| SLC6A5   | GAD1    |
| CHRNA6   | CHRNA4  |
| GRIN3A   | GRIN3B  |
| APRT     | PFAS    |
| RXRA     | MED1    |

|          |          |
|----------|----------|
| CHRNA2   | CHRNA1   |
| CAD      | AARS2    |
| KARS     | LARS2    |
| SLC25A13 | UBC      |
| CHRNA5   | CHRNA    |
| CHRNA6   | CHRNA    |
| TNF      | PTGS1    |
| CAD      | AARS     |
| CHRNA3   | CHRNA    |
| CHRNA4   | CHRNA6   |
| CHRNA7   | CHRNA    |
| GMPS     | NADSYN1  |
| NOS3     | NCF1     |
| CHRNA2   | CHRNA    |
| XDH      | HSD17B6  |
| NAGA     | CTSA     |
| ACACB    | SHMT2    |
| DRD5     | GRIA1    |
| IKBKB    | TNF      |
| SOAT1    | HMGCR    |
| CHRNA3   | CHRNA1   |
| SUCLG2   | DPYD     |
| CHRNA1   | CHRNA4   |
| NR1H3    | NR0B2    |
| UBC      | GLTP     |
| SUCLA2   | DPYD     |
| PGM1     | ACP1     |
| CHRNA2   | CHRNA6   |
| SOD2     | ATP2A1   |
| ATF6     | ATF3     |
| TOP2A    | YARS     |
| CTSD     | M6PR     |
| CHRNA4   | CHRNA    |
| INS      | SULT2A1  |
| MAOB     | UBC      |
| IMMT     | SMARCA5  |
| CHRNA2   | CHRNA    |
| SOD2     | ALDH5A1  |
| HDAC2    | TOP2A    |
| GPI      | GOT1     |
| ATP5B    | COX4I1   |
| PTGS1    | F2       |
| AKR1C2   | SRD5A1   |
| SDHC     | UBC      |
| SCN8A    | SCN5A    |
| MED1     | NR3C1    |
| SCN10A   | SCN5A    |
| CHRNA    | CHRNA3   |
| CHRNA5   | CHRNA    |
| ATF3     | ATF1     |
| IARS     | GLUL     |
| CYP2B6   | HSD17B6  |
| SHBG     | ESR1     |
| CHRNA3   | CHRNA    |
| GLO1     | PGM1     |
| DRD3     | COMT     |
| CHRNA3   | CHRNA6   |
| CYP17A1  | SULT2A1  |
| CRH      | INS      |
| INS      | CAT      |
| HSD17B6  | SULT2A1  |
| CHRNA5   | CHRNA3   |
| HBB      | SCN2A    |
| CYP2B6   | NOS3     |
| WARS     | NOS1     |
| NOS3     | CYBA     |
| MGAM     | PTH      |
| COX5A    | F9       |
| AR       | HSD17B6  |
| GRIA4    | GRIA3    |
| GRIA4    | GRIA2    |
| HARS     | JUN      |
| CHRNA    | CHRNA6   |
| BCL2     | INS      |
| PROZ     | SERPINC1 |



|          |          |
|----------|----------|
| ALDH18A1 | GCLC     |
| HNF4A    | INS      |
| ARAF     | CSNK2A1  |
| BHMT     | MTRR     |
| SCN9A    | SCN2B    |
| NCOA2    | NR1I2    |
| TOP2A    | EPRS     |
| UBC      | ATOX1    |
| XDH      | NCF1     |
| GMPS     | SHMT1    |
| HIBCH    | UBC      |
| FPGS     | SHMT2    |
| PCCB     | OXCT1    |
| QPRT     | UBC      |
| UBC      | CHRNA5   |
| VKORC1L1 | UBC      |
| MT-CO2   | NOS1     |
| IKBKB    | PRKAG1   |
| KCNQ2    | SCN2A    |
| CACNA1G  | CACNG1   |
| BCS1L    | HBA1     |
| GSTM1    | PPIG     |
| IKBKB    | PRKAG2   |
| NCF1     | CAT      |
| SERPINA1 | LYZ      |
| THNSL1   | DPYD     |
| GMPS     | WARS     |
| HCK      | UBC      |
| HSD17B6  | INS      |
| ERVW-1   | FURIN    |
| FHIT     | TP53     |
| QPRT     | SDHA     |
| MAOB     | HTR7     |
| F10      | COX5A    |
| ATF4     | ATF7     |
| WARS     | NOS2     |
| CACNA2D2 | CACNG1   |
| CACNA2D3 | CACNB1   |
| PPP2CA   | PIM1     |
| VARS     | TARS2    |
| ALDH18A1 | OTC      |
| IFNB1    | PTGS1    |
| SERPINA1 | HNF4A    |
| ECI2     | ACADSB   |
| AMY1A    | LCT      |
| GRIK1    | GRIN1    |
| GLDC     | OGDH     |
| TYMS     | MTRR     |
| DPYD     | PFAS     |
| CACNA1A  | CACNA2D1 |
| SUCLA2   | ACO2     |
| TLR4     | JUN      |
| GRM1     | GRIN2D   |
| NR1I2    | PPIG     |
| SCN4B    | SCN1A    |
| NCOA2    | HNF4A    |
| FKBP1A   | PPIB     |
| ERVW-1   | SLC1A4   |
| MT-CO2   | SLC25A4  |
| IARS     | FARSA    |
| PCCB     | OXCT2    |
| PRKACA   | FOS      |
| PPP3CA   | JUN      |
| YARS     | SHMT2    |
| TOP2B    | EPRS     |
| KYNU     | ASNS     |
| HDAC2    | TOP2B    |
| GRM4     | GRIN2B   |
| GMPS     | AARS     |
| DRD5     | CALY     |
| DRD1     | SLC6A3   |
| F2       | GRM1     |
| DRD5     | SLC6A4   |
| HDAC2    | MAOB     |
| THNSL1   | ALDH18A1 |

|         |         |
|---------|---------|
| HARS    | DARS2   |
| COMT    | PRODH   |
| GRIN2A  | DRD1    |
| SLC18A2 | SLC6A2  |
| GMPS    | EARS2   |
| HNF4G   | FABP2   |
| PTPN1   | NOS3    |
| PRKAA2  | PPARG   |
| SRC     | CSNK2A1 |
| SCN3B   | SCN3A   |
| GRM4    | GRIN2A  |
| VAR5    | AARS    |
| TOP2B   | YARS    |
| YARS    | DARS2   |
| COX7A1  | COX5B   |
| GMPS    | GARS    |
| UBC     | PISD    |
| OAT     | GLUL    |
| YARS    | SHMT1   |
| DARS2   | KARS    |
| CYP1A2  | NR1I2   |
| UBC     | NPRL2   |
| CDA     | UNG     |
| VAR5    | ATP5A1  |
| PTGS1   | TLR2    |
| EARS2   | LARS2   |
| QPRT    | NADSYN1 |
| TLR4    | PTGS1   |
| SHBG    | CYP17A1 |
| ABL1    | TOP1    |
| TH      | CRH     |
| MAOB    | SLC6A3  |
| ISYNA1  | SMARCA5 |
| FABP6   | FABP2   |
| HTR2A   | COMT    |
| NOS2    | NFKB1   |
| SIGMAR1 | PTGIS   |
| INS     | NFKB1   |
| EARS2   | ACACB   |
| BCL2    | RAC2    |
| ECI2    | ACACB   |
| PRSS1   | CFTR    |
| DDC     | ABAT    |
| SRC     | EDNRA   |
| GARS    | CHRNA4  |
| DDC     | SLC6A3  |
| YARS    | OTC     |
| PPP2CA  | TP53    |
| KARS    | FAR5B   |
| UBC     | ALDH1A1 |
| CSNK2A1 | NME1    |
| GOT1    | CKM     |
| PROS1   | F10     |
| YARS    | PAR52   |
| LGSN    | CAD     |
| NR1I3   | ABCB11  |
| CTPS1   | EPRS    |
| TOP2B   | FARS2   |
| TOP2A   | FARS2   |
| CACNA1S | ATP2A1  |
| HSD17B6 | ESR1    |
| ACSL3   | ACACB   |
| TOP2A   | DPYD    |
| MGAM    | LYZ     |
| GRIN1   | PTK2B   |
| SUCLG1  | ATP5C1  |
| JUN     | SDHC    |
| FKBP1A  | RXRB    |
| HTR7    | NPY     |
| SUCLG2  | CAD     |
| RXRA    | FKBP1A  |
| CYBA    | CAT     |
| FKBP1A  | RXRG    |
| CYP19A1 | INS     |
| KCNJ11  | SCN11A  |

|          |         |
|----------|---------|
| SUCLA2   | CAD     |
| GRIN2C   | GRIA1   |
| UBC      | DNPEP   |
| PRKAA2   | NME1    |
| GRIA1    | GRIN2D  |
| PRKAA1   | PPARG   |
| TOP2A    | JUN     |
| GLO1     | ACP1    |
| GRIA4    | GRIN2D  |
| SRC      | PRKACA  |
| ATP5A1   | SLC1A4  |
| PGR      | CTSD    |
| HTR3A    | SLC6A4  |
| CYP2A6   | CHRNA6  |
| AR       | BCL2    |
| MGAM     | INS     |
| ABCA1    | HMGCR   |
| TOP2B    | PFAS    |
| CYP19A1  | SULT2A1 |
| LARS     | DARS2   |
| DRD3     | SLC6A3  |
| AR       | INS     |
| NOS1     | CYP2B6  |
| ACACB    | ACSL4   |
| ACSL3    | ACOX1   |
| SDHC     | TP53    |
| CYP17A1  | COMT    |
| LYZ      | CAT     |
| TH       | MAOB    |
| HSD17B6  | CAT     |
| JUN      | SARS    |
| TH       | COMT    |
| GLYAT    | GLS     |
| HNF4G    | PMP2    |
| HNF4G    | FABP6   |
| GRIK1    | GRIN2A  |
| GRIK1    | GRM1    |
| TOP2A    | PFAS    |
| HNF4A    | PMP2    |
| PAICS    | ADSSL1  |
| SCN9A    | SCN4B   |
| CTNNB1   | ATP5A1  |
| DPYD     | OTC     |
| ABAT     | CSAD    |
| COX5A    | COX7A1  |
| ACACB    | PFAS    |
| CTPS1    | DHODH   |
| GRIK1    | UBC     |
| GRM7     | GRIN2A  |
| NOS3     | CFTR    |
| ECI2     | ACOT13  |
| PISD     | CDIPT   |
| S100B    | DRD4    |
| PTGS2    | CSNK2A1 |
| PRKCA    | GRM7    |
| FECH     | ALAS1   |
| UBC      | CA2     |
| TOP2B    | DPYD    |
| GMPS     | CTNNB1  |
| PTPN1    | ESR1    |
| UBC      | CKM     |
| CACNA1B  | MT-ND1  |
| ACADSB   | ACACB   |
| ABL1     | CAT     |
| NR1I3    | NCOA1   |
| CACNA2D2 | CACNB2  |
| GMPS     | GAMT    |
| BCL2     | HSPA5   |
| TARS     | CAD     |
| DRD5     | GAD2    |
| TARS2    | CAD     |
| HTR1A    | FOS     |
| ACMSD    | AADAT   |
| CHRNA4   | HSPA5   |
| GPI      | GOT2    |

|          |         |
|----------|---------|
| BCL2     | ANXA5   |
| TPI1     | PYGM    |
| XDH      | CYBA    |
| GRIK2    | GRIN2A  |
| GRIN2C   | GRIA4   |
| SHMT2    | GLUD2   |
| MT-ND1   | CSNK2A1 |
| TOP2B    | ESR1    |
| RAC1     | PKN3    |
| TNF      | NFATC1  |
| PDPK1    | PRKACA  |
| JUN      | CAT     |
| ACOX1    | COX6B1  |
| KARS     | WARS2   |
| ATF4     | MAF     |
| GRIK2    | GRIN2D  |
| GRM4     | GRIN2D  |
| HARS     | YARS2   |
| MGAM     | CAT     |
| GRIK2    | GRIN2C  |
| GRIA2    | GRIN2D  |
| SCN1A    | SCN3B   |
| SHMT1    | BHMT    |
| GRIK1    | GRIN2D  |
| GRM7     | GRIN2B  |
| GRIN2C   | GRIA2   |
| SDHC     | MT-CO2  |
| CYBB     | OTC     |
| DARS2    | IARS2   |
| RNASE1   | GLUD2   |
| LARS     | CARS2   |
| ATF7     | ATF1    |
| PARS2    | LARS2   |
| GRIK1    | GRIN2B  |
| JUN      | AARS    |
| PTK2B    | ACP1    |
| SCN4B    | SCN3A   |
| GRIN2A   | DRD5    |
| WARS     | LARS2   |
| GCLM     | CAT     |
| SDHD     | COX5B   |
| UBC      | GABRB3  |
| GRIK2    | GRIN2B  |
| GRIK2    | GRM1    |
| HARS     | AARS2   |
| TOP2A    | MLH1    |
| SUCLG1   | ACO2    |
| THNSL1   | NAGS    |
| ABAT     | HDC     |
| SLC18A2  | SLC32A1 |
| MT-CO1   | COX7A1  |
| ACSL4    | ACOX1   |
| GRM1     | GRIA4   |
| RPS6KA3  | JUN     |
| GMPS     | AARS2   |
| DPYD     | GLUL    |
| NUDT9    | GABRA1  |
| MB       | CKM     |
| CARS2    | SARS    |
| GPT2     | GLUD1   |
| DDC      | HTR7    |
| UBC      | PKN3    |
| KARS     | GRIK5   |
| ALDH18A1 | EPRS    |
| ATF3     | FOS     |
| TNF      | SLC1A2  |
| RPS6KA3  | NFKBIA  |
| MT-CO1   | NOS3    |
| PARS2    | FARS2   |
| PFAS     | PAPSS1  |
| MT-CO3   | COX7A1  |
| GRIK1    | GRIN2C  |
| ATF5     | FOS     |
| HSD3B1   | SIGMAR1 |
| JUN      | PIN1    |

|          |         |
|----------|---------|
| GRIA3    | GRIN2D  |
| TOP1     | PPP1CC  |
| NCOA1    | HNF4A   |
| MT-CO2   | SDHA    |
| SCN4A    | SCN4B   |
| DRD5     | GRIN2B  |
| CAD      | ODC1    |
| SEC14L2  | OTC     |
| PRDX5    | CAT     |
| HIBCH    | ACACB   |
| OPRM1    | GSTM1   |
| TRPM8    | FOLH1   |
| GRIN2C   | GRIA3   |
| NUDT9    | GABRG1  |
| HSPA5    | CAD     |
| THBD     | PROCR   |
| HTR7     | SLC6A3  |
| CARS     | FARSB   |
| HPGDS    | GSS     |
| HTR1A    | SLC6A3  |
| BCL2     | CDK6    |
| CACNA2D2 | CACNA1D |
| TOP1     | CSNK2A1 |
| CBS      | PRKAG3  |
| QPRT     | KYNU    |
| HTR2A    | SLC6A3  |
| SLC25A15 | ASL     |
| UBC      | GCLC    |
| ACTA1    | RUVBL1  |
| TOP2B    | MLH1    |
| LARS     | ARG1    |
| HDC      | HNF1A   |
| NR1H2    | ALAS2   |
| UBC      | PRKAG2  |
| SHMT2    | GLUL    |
| GRIN2A   | NOS3    |
| PRKCA    | NFATC1  |
| OPRM1    | CALM1   |
| AKR1C1   | SRD5A1  |
| MT-CO2   | COX7A1  |
| RUVBL1   | ACTG2   |
| ALDH5A1  | GABRB2  |
| CARS     | ACACB   |
| TNF      | F2      |
| DRD2     | GRIA2   |
| CACNA2D2 | CACNB3  |
| GLUL     | SLC1A1  |
| SERPINA1 | PRSS1   |
| GRIK1    | GRIN3A  |
| HARS     | VARA    |
| EARS2    | CARS2   |
| NCOA1    | TP53    |
| SLC6A5   | GAD2    |
| CARS     | EARS2   |
| RORA     | NME1    |
| NOS3     | GRIN2B  |
| NOS3     | CYP19A1 |
| PTGS1    | EDNRA   |
| ACACB    | SHMT1   |
| SUCLG2   | KCNQ2   |
| TH       | MB      |
| GRM4     | GRIN2C  |
| LARS     | PARS2   |
| ATF7     | JDP2    |
| RXRA     | NCOA1   |
| PFAS     | IARS2   |
| PFAS     | TARS    |
| NCOA2    | PPARD   |
| NOS3     | GCLC    |
| SDHD     | ATP5C1  |
| SCN4A    | SCN2B   |
| CYTH2    | UBC     |
| ATF4     | JDP2    |
| RXRA     | NCOA2   |
| CACNA2D2 | CACNA1C |

|          |          |
|----------|----------|
| PPIA     | FKBP1A   |
| MGAM     | NADSYN1  |
| NAGS     | FARS2    |
| ADRB1    | ADRA2A   |
| JUN      | AARS2    |
| TARS2    | CARS2    |
| CARS     | VAR5     |
| PGR      | FOS      |
| DPYD     | ACACB    |
| TARS     | CARS2    |
| NFS1     | ACO2     |
| GRIK3    | GRIN2D   |
| HARS     | SHMT1    |
| NQO1     | GOT2     |
| PSAT1    | SHMT1    |
| ACHE     | CAT      |
| ACACB    | HMGCR    |
| YARS     | UCKL1    |
| ACTA1    | TP53     |
| YARS     | ALDH18A1 |
| ABL1     | BCL2     |
| PRKCA    | GRIA2    |
| HSPA5    | LCT      |
| CACNA1A  | CACNG1   |
| EARS2    | CAD      |
| CACNA2D2 | CACNA1G  |
| WARS     | FARSA    |
| HIBCH    | OXCT1    |
| SHMT2    | KARS     |
| NOS2     | OPRK1    |
| GRIK3    | GRIN3B   |
| ALDH18A1 | DPYD     |
| IARS2    | LARS2    |
| SLC6A14  | SLC7A8   |
| RXRA     | RARG     |
| YARS     | DPYD     |
| TNF      | RAC1     |
| UBC      | FURIN    |
| LARS     | ARG2     |
| TOP2B    | TYMS     |
| SRC      | ANXA1    |
| ESRRG    | NCOA1    |
| DRD4     | GABRA1   |
| UBC      | LALBA    |
| F7       | TP53     |
| SRC      | NR3C2    |
| PGM1     | ADH1B    |
| RXRA     | RARB     |
| GLDC     | GLUL     |
| PFAS     | GLUL     |
| GMPS     | EFTUD1   |
| IARS     | EARS2    |
| RAC1     | PRKACA   |
| PRKCA    | RHO      |
| CBS      | PAPSS1   |
| GSTP1    | MLH1     |
| PHGDH    | SMARCA5  |
| ABCB11   | NR0B2    |
| GRIK3    | GRIN2B   |
| LARS     | TH       |
| EPRS     | WARS     |
| CSAD     | AGXT2    |
| GRIK3    | GRIN2A   |
| UBC      | EARS2    |
| GRIK1    | GRIN3B   |
| PGM1     | GOT1     |
| GRIK2    | GRIN3A   |
| VAR5     | UBC      |
| ACACB    | ACCS     |
| SDHC     | COX6C    |
| CALM1    | YWHAE    |
| NR0B1    | NR3C1    |
| ABCA1    | SOAT1    |
| GRIK3    | GRIN3A   |
| EFTUD1   | CAD      |

|        |         |
|--------|---------|
| HARS   | TOP2A   |
| SRD5A1 | HSD11B1 |
| SYK    | EPOR    |
| NOS1   | CAT     |
| GOT2   | CKM     |
| SDHD   | COX5A   |
| MGAM   | MT-CO3  |
| NOS2   | GCLC    |
| TOP2A  | FARSA   |
| COX6C  | ALDH2   |
| GRIK3  | GRIN2C  |
| SDHC   | FOS     |
| PAH    | HAL     |
| JUN    | PTGS1   |
| LGSN   | DPYD    |
| TP53   | IL2     |
| GMPS   | GLUL    |
| GRIN3A | GRIN2D  |
| CHRNA4 | SRC     |
| TOP2B  | FARSA   |
| PHGDH  | SLC1A4  |
| TOP2A  | UNG     |
| RHO    | GUCA1A  |
| HDAC2  | BCL2    |
| HTR7   | SLC6A2  |
| GRIN3A | GRIN2C  |
| ERVW-1 | IL2     |
| HTR1A  | CRH     |
| NOS3   | PPARG   |
| GAD1   | GABRB2  |
| FABP6  | PMP2    |
| GLYAT  | PCYT1A  |
| F7     | COX5A   |
| NAGA   | M6PR    |

|  |  |  |
|--|--|--|
|  |  |  |
|--|--|--|



**Table S4 Detailed information of 66 QXHC candidate targets in the treatment of menstrual disorders**

| Herbs | Chemical components | Candidate targets |
|-------|---------------------|-------------------|
| CH    | caprylic_acid       | ABL1              |
| CH    | caprylic_acid       | CALM1             |
| CH    | caprylic_acid       | INS               |
| CH    | caprylic_acid       | PRKACA            |
| CH    | caprylic_acid       | TLR4              |
| CH    | cresol              | INS               |
| CH    | heptanoic_acid      | ABL1              |
| CH    | heptanoic_acid      | CALM1             |
| CH    | heptanoic_acid      | INS               |
| CH    | heptanoic_acid      | PRKACA            |
| CH    | heptanoic_acid      | TLR4              |
| CH    | hexadecanoic_acid   | ABL1              |
| CH    | hexadecanoic_acid   | CALM1             |
| CH    | hexadecanoic_acid   | INS               |
| CH    | hexadecanoic_acid   | PRKACA            |
| CH    | hexadecanoic_acid   | TLR4              |
| CH    | pelargonic_acid     | ABL1              |
| CH    | pelargonic_acid     | CALM1             |
| CH    | pelargonic_acid     | INS               |
| CH    | pelargonic_acid     | PRKACA            |
| CH    | pelargonic_acid     | TLR4              |
| CS    | salicylic_acid      | PTGS2             |
| CX    | Linoleic_acid       | PTGS2             |
| CX    | arachic_acid        | ABL1              |
| CX    | arachic_acid        | CALM1             |
| CX    | arachic_acid        | INS               |
| CX    | arachic_acid        | PRKACA            |
| CX    | arachic_acid        | TLR4              |
| DG    | arginine            | ASS1              |
| DG    | arginine            | NOS2              |
| DG    | arginine            | NOS3              |
| DG    | glutamic_acid       | ALDH18A1          |
| DG    | glutamic_acid       | ASNS              |
| DG    | glutamic_acid       | EARS2             |
| DG    | glutamic_acid       | EPRS              |
| DG    | glutamic_acid       | GLUD1             |
| DG    | glutamic_acid       | GLUD2             |
| DG    | glutamic_acid       | GLUL              |
| DG    | glutamic_acid       | GOT1              |
| DG    | glutamic_acid       | GOT2              |
| DG    | glutamic_acid       | GRIA1             |
| DG    | glutamic_acid       | GRIN2A            |
| DG    | glutamic_acid       | GRIN2B            |
| DG    | glutamic_acid       | GRIN2D            |
| DG    | glycine             | GARS              |
| DG    | glycine             | GRIN2A            |
| DG    | isoleucine          | IARS              |
| DG    | leucine             | LARS              |
| DG    | lysine              | KARS              |
| DG    | molalanine          | AARS              |
| DG    | p-cresol            | INS               |
| DG    | phenylalanine       | CRH               |
| DG    | phosphatidylserine  | PRKCA             |
| DG    | proline             | EPRS              |
| DG    | serine              | SARS              |
| DG    | tryptophane         | WARS              |
| DG    | tyrosine            | YARS              |
| GC    | Urea                | CTNNB1            |
| HH    | arachic_acid        | ABL1              |
| HH    | arachic_acid        | CALM1             |
| HH    | arachic_acid        | INS               |
| HH    | arachic_acid        | PRKACA            |
| HH    | arachic_acid        | TLR4              |
| HH    | linoleic_acid       | PTGS2             |
| HH    | lysine              | KARS              |
| NX    | arginine            | ASS1              |
| NX    | arginine            | NOS2              |
| NX    | arginine            | NOS3              |
| NX    | glutamic_acid       | ALDH18A1          |
| NX    | glutamic_acid       | ASNS              |
| NX    | glutamic_acid       | EARS2             |
| NX    | glutamic_acid       | EPRS              |
| NX    | glutamic_acid       | GLUD1             |
| NX    | glutamic_acid       | GLUD2             |

|    |                                      |         |
|----|--------------------------------------|---------|
| NX | glutamic_acid                        | GLUL    |
| NX | glutamic_acid                        | GOT1    |
| NX | glutamic_acid                        | GOT2    |
| NX | glutamic_acid                        | GRIA1   |
| NX | glutamic_acid                        | GRIN2A  |
| NX | glutamic_acid                        | GRIN2B  |
| NX | glutamic_acid                        | GRIN2D  |
| NX | glycine                              | GARS    |
| NX | glycine                              | GRIN2A  |
| NX | leucine                              | LARS    |
| NX | phenylalanine                        | CRH     |
| NX | proline                              | EPRS    |
| NX | serine                               | SARS    |
| NX | tryptophane                          | WARS    |
| NX | tyrosine                             | YARS    |
| TR | linoleic_acid                        | PTGS2   |
| TR | tryptophane                          | WARS    |
| ZQ | ephedrine                            | ATF2    |
| ZQ | ephedrine                            | ATF4    |
| ZQ | ephedrine                            | FOS     |
| ZQ | ephedrine                            | JUN     |
| ZQ | ephedrine                            | NFATC1  |
| ZQ | ephedrine                            | TNF     |
| ZQ | pseudoephedrine                      | ATF2    |
| ZQ | pseudoephedrine                      | ATF4    |
| ZQ | pseudoephedrine                      | FOS     |
| ZQ | pseudoephedrine                      | JUN     |
| ZQ | pseudoephedrine                      | NFATC1  |
| ZQ | pseudoephedrine                      | TNF     |
| CH | pregnenolone                         | GRIN2A  |
| CH | pregnenolone                         | GRIN2B  |
| CH | pregnenolone                         | GRIN2D  |
| CH | pregnenolone                         | PPARA   |
| CH | kaempferol                           | PTK2B   |
| GC | 2-Methyl-1,3,6-trity.....            | CSNK2A1 |
| CX | chrysoaphanol                        | CSNK2A1 |
| CX | chrysophanic_acid                    | CSNK2A1 |
| DS | 1,8-Dihydroxy-3-methyl-anthraquinone | CSNK2A1 |
| CH | caprylic_acid                        | PTGS2   |
| CH | heptanoic_acid                       | PTGS2   |
| CH | hexadecanoic_acid                    | PTGS2   |
| CH | pelargonic_acid                      | PTGS2   |
| CX | Linoleic_acid                        | ABL1    |
| CX | Linoleic_acid                        | CALM1   |
| CX | Linoleic_acid                        | INS     |
| CX | Linoleic_acid                        | PRKACA  |
| CX | Linoleic_acid                        | TLR4    |
| CX | arachic_acid                         | PTGS2   |
| HH | arachic_acid                         | PTGS2   |
| HH | linoleic_acid                        | ABL1    |
| HH | linoleic_acid                        | CALM1   |
| HH | linoleic_acid                        | INS     |
| HH | linoleic_acid                        | PRKACA  |
| HH | linoleic_acid                        | TLR4    |
| TR | linoleic_acid                        | ABL1    |
| TR | linoleic_acid                        | CALM1   |
| TR | linoleic_acid                        | INS     |
| TR | linoleic_acid                        | PRKACA  |
| TR | linoleic_acid                        | TLR4    |
| WY | linderaic_acid                       | PTGS2   |
| CH | caproic_acid                         | ABL1    |
| CH | caproic_acid                         | CALM1   |
| CH | caproic_acid                         | INS     |
| CH | caproic_acid                         | PRKACA  |
| CH | caproic_acid                         | TLR4    |
| DG | arginine                             | NOS3    |
| NX | arginine                             | NOS3    |
| DG | histidine                            | HARS    |
| CH | quercetol_                           | PTK2B   |
| CH | quercetol_                           | PTK2B   |
| CX | Quercetin                            | PTK2B   |
| ZQ | quercetin                            | PTK2B   |
| DG | adenine                              | ACACB   |
| CH | phenol                               | INS     |
| DG | phenol                               | INS     |
| DS | baicalin                             | CSNK2A1 |
| DS | baicalin                             | PRKACA  |

|    |                           |         |
|----|---------------------------|---------|
| DS | baicalin                  | PRKCA   |
| DS | baicalin                  | PRKCB   |
| DS | baicalin                  | SYK     |
| CH | caproic_acid              | PTGS2   |
| CX | Linoleic_acid             | PTGS2   |
| HH | linoleic_acid             | PTGS2   |
| TR | linoleic_acid             | PTGS2   |
| WY | linderaic_acid            | ABL1    |
| WY | linderaic_acid            | CALM1   |
| WY | linderaic_acid            | INS     |
| WY | linderaic_acid            | PRKACA  |
| WY | linderaic_acid            | TLR4    |
| DG | 2,4-dihydroxyacetophenone | PTGS2   |
| DG | valine                    | CRH     |
| NX | valine                    | CRH     |
| ZQ | naringenin                | PTK2B   |
| DS | przewalskin               | PPP2CA  |
| DS | przewalskin               | PPP2CB  |
| DS | przewalskin               | PRKCA   |
| DS | przewalskin               | PRKCB   |
| DG | anistic_acid              | PTGS2   |
| DG | valine                    | AARS    |
| NX | valine                    | AARS    |
| DG | phenylalanine             | YARS    |
| JG | platycodin_A              | PPP1CC  |
| JG | platycodin_B              | PPP1CC  |
| JG | platycodin_C              | PPP1CC  |
| JG | platycodin_D              | PPP1CC  |
| JG | platycodin_D-2            | PPP1CC  |
| JG | platycodin_D-3            | PPP1CC  |
| JG | polygalacin_D-2           | PPP1CC  |
| NX | phenylalanine             | YARS    |
| ZQ | (-)-synephrine            | TNF     |
| CX | isorhamnetin              | PTK2B   |
| GC | Hispidulin                | PTK2B   |
| CS | gallic_acid               | PTGS2   |
| DG | arginine                  | NOS1    |
| HH | cholesterol               | GRIN2A  |
| HH | cholesterol               | GRIN2B  |
| HH | cholesterol               | GRIN2D  |
| HH | cholesterol               | PPARA   |
| NX | arginine                  | NOS1    |
| TR | 7-dehydroavenasterol      | GRIN2A  |
| TR | 7-dehydroavenasterol      | GRIN2B  |
| TR | 7-dehydroavenasterol      | GRIN2D  |
| TR | 7-dehydroavenasterol      | PPARA   |
| TR | campesterol               | GRIN2A  |
| TR | campesterol               | GRIN2B  |
| TR | campesterol               | GRIN2D  |
| TR | campesterol               | PPARA   |
| CH | 2-nonenoic_acid           | PTGS2   |
| CH | caprylic_acid             | PTGS2   |
| CH | heptanoic_acid            | PTGS2   |
| CH | hexadecanoic_acid         | PTGS2   |
| CH | pelargonic_acid           | PTGS2   |
| CX | 2-tetradecenoic_acid      | PTGS2   |
| CX | arachic_acid              | PTGS2   |
| CX | hexadecenoic_acid         | PTGS2   |
| GC | Ruvoside                  | PPP1CC  |
| HH | arachic_acid              | PTGS2   |
| WY | linderaic_acid            | PTGS2   |
| CX | kaikasaponin_III          | PPP1CC  |
| DG | arginine                  | NOS2    |
| NX | arginine                  | NOS2    |
| GC | Licoricesaponine_D3       | GNAS    |
| CH | valeric_acid              | ABL1    |
| CH | valeric_acid              | CALM1   |
| CH | valeric_acid              | INS     |
| CH | valeric_acid              | PRKACA  |
| CH | valeric_acid              | TLR4    |
| JG | platycogenic_acid_A       | NOS2    |
| DG | o-cresol                  | INS     |
| DG | tyrosine                  | YARS    |
| GC | 2-Methyl-1,3,6-trity..... | CSNK2A1 |
| NX | tyrosine                  | YARS    |
| JG | methyl_platyconate-_A     | PPP1CC  |
| NX | inokosterone              | NOS2    |

|    |                                      |         |
|----|--------------------------------------|---------|
| CX | chryaophanol                         | CSNK2A1 |
| CX | chrysophanic_acid                    | CSNK2A1 |
| DG | phenylalanine                        | YARS    |
| DG | serine                               | GOT1    |
| DS | 1,8-Dihydroxy-3-methyl-anthraquinone | CSNK2A1 |
| GC | Glyyunnanprosapogenin_D              | GNAS    |
| NX | phenylalanine                        | YARS    |
| NX | serine                               | GOT1    |
| CX | soyasaponin_I                        | PPP1CC  |
| JG | deapioplatycodin_D                   | PPP1CC  |
| CH | quercetol_                           | CSNK2A1 |
| CH | quercetol_                           | PRKACA  |
| CH | quercetol_                           | PRKCA   |
| CH | quercetol_                           | PRKCB   |
| CH | quercetol_                           | SYK     |
| CH | quercetol_                           | CSNK2A1 |
| CH | quercetol_                           | PRKACA  |
| CH | quercetol_                           | PRKCA   |
| CH | quercetol_                           | PRKCB   |
| CH | quercetol_                           | SYK     |
| CX | Quercetin                            | CSNK2A1 |
| CX | Quercetin                            | PRKACA  |
| CX | Quercetin                            | PRKCA   |
| CX | Quercetin                            | PRKCB   |
| CX | Quercetin                            | SYK     |
| HH | dopa                                 | YARS    |
| ZQ | quercetin                            | CSNK2A1 |
| ZQ | quercetin                            | PRKACA  |
| ZQ | quercetin                            | PRKCA   |
| ZQ | quercetin                            | PRKCB   |
| ZQ | quercetin                            | SYK     |
| CS | $\beta$ -sitosterol                  | GRIN2A  |
| CS | $\beta$ -sitosterol                  | GRIN2B  |
| CS | $\beta$ -sitosterol                  | GRIN2D  |
| CS | $\beta$ -sitosterol                  | PPARA   |
| CX | sophoradiol                          | GRIN2A  |
| CX | sophoradiol                          | GRIN2B  |
| CX | sophoradiol                          | GRIN2D  |
| CX | sophoradiol                          | PPARA   |
| CX | $\beta$ -Sitosterol                  | GRIN2A  |
| CX | $\beta$ -Sitosterol                  | GRIN2B  |
| CX | $\beta$ -Sitosterol                  | GRIN2D  |
| CX | $\beta$ -Sitosterol                  | PPARA   |
| DG | arginine                             | NOS1    |
| DG | arginine                             | NOS2    |
| DG | $\beta$ -sitosterol                  | GRIN2A  |
| DG | $\beta$ -sitosterol                  | GRIN2B  |
| DG | $\beta$ -sitosterol                  | GRIN2D  |
| DG | $\beta$ -sitosterol                  | PPARA   |
| DS | stigmasterol                         | GRIN2A  |
| DS | stigmasterol                         | GRIN2B  |
| DS | stigmasterol                         | GRIN2D  |
| DS | stigmasterol                         | PPARA   |
| GC | Gamma-sitosterol                     | GRIN2A  |
| GC | Gamma-sitosterol                     | GRIN2B  |
| GC | Gamma-sitosterol                     | GRIN2D  |
| GC | Gamma-sitosterol                     | PPARA   |
| HH | stigmasterol                         | GRIN2A  |
| HH | stigmasterol                         | GRIN2B  |
| HH | stigmasterol                         | GRIN2D  |
| HH | stigmasterol                         | PPARA   |
| HH | $\beta$ -sitosterol                  | GRIN2A  |
| HH | $\beta$ -sitosterol                  | GRIN2B  |
| HH | $\beta$ -sitosterol                  | GRIN2D  |
| HH | $\beta$ -sitosterol                  | PPARA   |
| NX | arginine                             | NOS1    |
| NX | arginine                             | NOS2    |
| SM | $\beta$ -sitosterol                  | GRIN2A  |
| SM | $\beta$ -sitosterol                  | GRIN2B  |
| SM | $\beta$ -sitosterol                  | GRIN2D  |
| SM | $\beta$ -sitosterol                  | PPARA   |
| TR | citrostadienol                       | GRIN2A  |
| TR | citrostadienol                       | GRIN2B  |
| TR | citrostadienol                       | GRIN2D  |
| TR | citrostadienol                       | PPARA   |
| TR | $\beta$ -sitosterol                  | GRIN2A  |
| TR | $\beta$ -sitosterol                  | GRIN2B  |

|     |                          |         |
|-----|--------------------------|---------|
| TR  | β-sitosterol             | GRIN2D  |
| TR  | β-sitosterol             | PPARA   |
| XF  | cyperolone               | GRIN2A  |
| XF  | cyperolone               | GRIN2B  |
| XF  | cyperolone               | GRIN2D  |
| XF  | cyperolone               | PPARA   |
| YHS | β-sitosterol             | GRIN2A  |
| YHS | β-sitosterol             | GRIN2B  |
| YHS | β-sitosterol             | GRIN2D  |
| YHS | β-sitosterol             | PPARA   |
| GC  | Licoricesaponine_G2      | PPP1CC  |
| GC  | Licoricesaponine_J2      | PPP1CC  |
| GC  | Licoricesaponine_K2      | PPP1CC  |
| CS  | β-amyrin                 | GRIN2A  |
| CS  | β-amyrin                 | GRIN2B  |
| CS  | β-amyrin                 | GRIN2D  |
| CS  | β-amyrin                 | PPARA   |
| DS  | sugiol                   | PPP2CA  |
| DS  | sugiol                   | PPP2CB  |
| DS  | sugiol                   | PRKCA   |
| DS  | sugiol                   | PRKCB   |
| XF  | cyperol                  | GRIN2A  |
| XF  | cyperol                  | GRIN2B  |
| XF  | cyperol                  | GRIN2D  |
| XF  | cyperol                  | PPARA   |
| GC  | Methyl-24-hydro...       | NOS2    |
| DG  | arginine                 | NOS3    |
| NX  | arginine                 | NOS3    |
| XF  | isocyperol               | GRIN2A  |
| XF  | isocyperol               | GRIN2B  |
| XF  | isocyperol               | GRIN2D  |
| XF  | isocyperol               | PPARA   |
| DG  | glutamic_acid            | GLUL    |
| NX  | glutamic_acid            | GLUL    |
| SM  | methylcimicifugoside     | PPP1CC  |
| DG  | leucine                  | EGF     |
| NX  | leucine                  | EGF     |
| GC  | Isoramanine              | GRIN2A  |
| GC  | Isoramanine              | GRIN2B  |
| GC  | Isoramanine              | GRIN2D  |
| GC  | Isoramanine              | PPARA   |
| SM  | cimicifugoside           | PPP1CC  |
| CH  | kaempferitrin            | CSNK2A1 |
| CH  | kaempferitrin            | PRKACA  |
| CH  | kaempferitrin            | PRKCA   |
| CH  | kaempferitrin            | PRKCB   |
| CH  | kaempferitrin            | SYK     |
| CH  | 3-O-acetylsaikosaponin_d | PPP1CC  |
| CH  | saikosaponin_A           | PPP1CC  |
| CH  | saikosaponin_b1          | PPP1CC  |
| CH  | saikosaponin_b2          | PPP1CC  |
| CH  | saikosaponin_c           | PPP1CC  |
| CH  | saikosaponin_d           | PPP1CC  |
| CH  | saikosaponin_e           | PPP1CC  |
| DG  | adenine                  | PRKACA  |
| DG  | tyrosine                 | YARS    |
| GC  | Lincoricesaponine_A3     | PPP1CC  |
| NX  | tyrosine                 | YARS    |
| DS  | oleanolic_acid           | GRIN2A  |
| DS  | oleanolic_acid           | GRIN2B  |
| DS  | oleanolic_acid           | GRIN2D  |
| DS  | oleanolic_acid           | PPARA   |
| DS  | ursolic_acid             | GRIN2A  |
| DS  | ursolic_acid             | GRIN2B  |
| DS  | ursolic_acid             | GRIN2D  |
| DS  | ursolic_acid             | PPARA   |
| GC  | Glycyrrhizic_acid        | GNAS    |
| GC  | Licoricesaponine_C2      | GNAS    |
| GC  | Licoricesaponine_H2      | GNAS    |
| DG  | phosphatidylglycerol     | PRKCA   |
| JG  | chondrillasterol         | GRIN2A  |
| JG  | chondrillasterol         | GRIN2B  |
| JG  | chondrillasterol         | GRIN2D  |
| JG  | chondrillasterol         | PPARA   |
| DG  | glutamic_acid            | ADSS    |
| DG  | glutamic_acid            | ASNS    |
| DG  | glutamic_acid            | ASS1    |

|     |                                 |         |
|-----|---------------------------------|---------|
| DG  | glutamic_acid                   | CAD     |
| DG  | glutamic_acid                   | GOT1    |
| DG  | glutamic_acid                   | GOT2    |
| GC  | Neohancoside_A                  | PPP1CC  |
| JG  | platycodigenin                  | NOS2    |
| NX  | glutamic_acid                   | ADSS    |
| NX  | glutamic_acid                   | ASNS    |
| NX  | glutamic_acid                   | ASS1    |
| NX  | glutamic_acid                   | CAD     |
| NX  | glutamic_acid                   | GOT1    |
| NX  | glutamic_acid                   | GOT2    |
| ZQ  | epoxybergamottin                | PIK3CA  |
| ZQ  | epoxybergamottin                | PIK3R1  |
| CX  | senkyunolide_P                  | CACNA1B |
| CX  | senkyunolide_P                  | CACNA1C |
| DG  | tyrosine                        | PRKACA  |
| DS  | baicalin                        | PTK2B   |
| NX  | tyrosine                        | PRKACA  |
| ZQ  | hesperetin                      | PTK2B   |
| DS  | paramiltioic_acid               | PPP1CC  |
| DS  | salviol                         | PPP2CA  |
| DS  | salviol                         | PPP2CB  |
| DS  | salviol                         | PRKCA   |
| DS  | salviol                         | PRKCB   |
| CH  | 2-nonenoic_acid                 | ABL1    |
| CH  | 2-nonenoic_acid                 | CALM1   |
| CH  | 2-nonenoic_acid                 | INS     |
| CH  | 2-nonenoic_acid                 | PRKACA  |
| CH  | 2-nonenoic_acid                 | TLR4    |
| CH  | 2-octenoic_acid                 | PTGS2   |
| CH  | caproic_acid                    | PTGS2   |
| CH  | valeric_acid                    | PTGS2   |
| CS  | salicylic_acid                  | PTGS2   |
| CX  | 2-tetradecenoic_acid            | ABL1    |
| CX  | 2-tetradecenoic_acid            | CALM1   |
| CX  | 2-tetradecenoic_acid            | INS     |
| CX  | 2-tetradecenoic_acid            | PRKACA  |
| CX  | 2-tetradecenoic_acid            | TLR4    |
| CX  | hexadecenoic_acid               | ABL1    |
| CX  | hexadecenoic_acid               | CALM1   |
| CX  | hexadecenoic_acid               | INS     |
| CX  | hexadecenoic_acid               | PRKACA  |
| CX  | hexadecenoic_acid               | TLR4    |
| CX  | octadecatrienoic_acid           | PTGS2   |
| CX  | tetradecadienoic_acid           | PTGS2   |
| DG  | anistic_acid                    | PTGS2   |
| DG  | phenylalanine                   | YARS    |
| DG  | tyrosine                        | CRH     |
| NX  | inokosterone                    | PPP1CC  |
| NX  | phenylalanine                   | YARS    |
| NX  | tyrosine                        | CRH     |
| CH  | 3,6-O,O-diacetylsaikosaponin_b2 | PPP1CC  |
| CH  | saikosaponin_b3                 | PPP1CC  |
| CH  | saikosaponin_b4                 | PPP1CC  |
| GC  | Methyl3-O-beta-D-.....          | PPP1CC  |
| GC  | Uralsaponin_A                   | PPP1CC  |
| GC  | Uralsaponin_B                   | PPP1CC  |
| CH  | kaempferol                      | CSNK2A1 |
| CH  | kaempferol                      | PRKACA  |
| CH  | kaempferol                      | PRKCA   |
| CH  | kaempferol                      | PRKCB   |
| CH  | kaempferol                      | SYK     |
| DS  | miltipolone                     | PPP2CA  |
| DS  | miltipolone                     | PPP2CB  |
| DS  | miltipolone                     | PRKCA   |
| DS  | miltipolone                     | PRKCB   |
| NX  | rubrosterone                    | GRIN2A  |
| NX  | rubrosterone                    | GRIN2B  |
| NX  | rubrosterone                    | GRIN2D  |
| NX  | rubrosterone                    | PPARA   |
| YHS | glaucine                        | RAC1    |
| YHS | glaucine                        | RAC2    |
| GC  | Glyeursaponin                   | GNAS    |
| DG  | alexandrin                      | PPP1CC  |
| DG  | eleutheroside_A                 | PPP1CC  |
| DS  | alexandrin                      | PPP1CC  |
| DS  | daucosterol                     | PPP1CC  |

|    |                         |        |
|----|-------------------------|--------|
| DS | eleutheroside_A         | PPP1CC |
| HH | alexandrin              | PPP1CC |
| HH | eleutheroside_A         | PPP1CC |
| TR | alexandrin              | PPP1CC |
| TR | eleutheroside_A         | PPP1CC |
| CH | caprylic_acid           | TLR4   |
| CH | heptanoic_acid          | TLR4   |
| CH | hexadecanoic_acid       | TLR4   |
| CH | p-isopropylbenzoic_acid | BCL2   |
| CH | p-isopropylbenzoic_acid | PTGS2  |
| CH | pelargonic_acid         | TLR4   |
| CX | arachic_acid            | TLR4   |
| DG | galacturonic_acid       | SRC    |
| DG | glucuronic_acid         | SRC    |
| DS | ferruginol              | PPP2CA |
| DS | ferruginol              | PPP2CB |
| DS | ferruginol              | PRKCA  |
| DS | ferruginol              | PRKCB  |
| DS | tanshinaldehyde         | PIK3CA |
| DS | tanshinaldehyde         | PIK3R1 |
| GC | Glyyunnanprosapogenin_D | PPP1CC |
| GC | Isoramanine             | NOS2   |
| GC | Methyl_2-hydroxy-3,4..  | IKBKB  |
| GC | Methyl_2-hydroxy-3,4..  | NFKB1  |
| GC | Methyl_2-hydroxy-3,4..  | PRKAA1 |
| GC | Methyl_2-hydroxy-3,4..  | PTGS2  |
| GC | Methyl_2-hydroxy-3,4..  | TP53   |
| HH | arachic_acid            | TLR4   |
| HH | dopa                    | PRKACA |
| NX | galacturonic_acid       | SRC    |
| NX | glucuronic_acid         | SRC    |

**Table S5 A total of 41 pairs of QXHC candidate targets and the corresponding chemical components delivered into docking**

| <b>Chemical_components</b> | <b>Major_targets</b> |
|----------------------------|----------------------|
| caprylic_acid              | ABL1                 |
| caprylic_acid              | PRKACA               |
| caprylic_acid              | TLR4                 |
| heptanoic_acid             | ABL1                 |
| heptanoic_acid             | PRKACA               |
| heptanoic_acid             | TLR4                 |
| hexadecanoic_acid          | ABL1                 |
| hexadecanoic_acid          | PRKACA               |
| hexadecanoic_acid          | TLR4                 |
| pelargonic_acid            | ABL1                 |
| pelargonic_acid            | PRKACA               |
| pelargonic_acid            | TLR4                 |
| salicylic_acid             | PTGS2                |
| Linoleic_acid              | PTGS2                |
| arachic_acid               | ABL1                 |
| arachic_acid               | PRKACA               |
| arachic_acid               | TLR4                 |
| arginine                   | ASS1                 |
| arginine                   | NOS2                 |
| arginine                   | NOS3                 |
| glutamic_acid              | EPRS                 |
| glutamic_acid              | GLUD1                |
| glutamic_acid              | GLUD2                |
| glutamic_acid              | GLUL                 |
| glutamic_acid              | GOT1                 |
| glutamic_acid              | GRIA1                |
| glutamic_acid              | GRIN2A               |
| glutamic_acid              | GRIN2B               |
| glycine                    | GARS                 |
| glycine                    | GRIN2A               |
| lysine                     | KARS                 |
| molalanine                 | AARS                 |



|                    |       |
|--------------------|-------|
| phenylalanine      | CRH   |
| phosphatidylserine | PRKCA |
| proline            | EPRS  |
| serine             | SARS  |
| tryptophane        | WARS  |
| tyrosine           | YARS  |
| ephedrine          | TNF   |
| pseudoephedrine    | TNF   |
